# Supplementary material for: A cohort study of mortality predictors and characteristics of patients with combined pulmonary fibrosis and emphysema
Source: PubMed Central journal article supplement — BMJ Open. 2012 May 15;2(3):e000988. doi: 10.1136/bmjopen-2012-000988 (PMC3358615; doi:10.1136/bmjopen-2012-000988), 2012-05-15
Supplement: bmjopen-2012-000988-s1.pdf [file bmjopen-2012-000988-s1.pdf]

**A Cohort Study of mortality predictors and characteristics of patients with combined pulmonary fibrosis and emphysema**

**Tomoo Kishaba<sup>1</sup>, Yousuke Shimaoka<sup>1</sup>, Hajime Fukuyama<sup>1</sup>, Kyoko Yoshida<sup>2</sup>, Maki Noyama<sup>3</sup>, Shin Yamashiro<sup>1</sup>, Hitoshi Tamaki<sup>1</sup>**

**<sup>1</sup>Department of Respiratory Medicine, Okinawa Chubu Hospital, Okinawa, Japan**

**<sup>2</sup> Department of home care, Nakamura Clinic**

**<sup>3</sup> Department of Respiratory Medicine, Kurashiki Central Hospital**

**Corresponding author and request for reprints:**

**Tomoo Kishaba**

**Department of Respiratory Medicine, Okinawa Chubu Hospital**

**Miyazato 281, Uruma City, Okinawa 904-2293, Japan**

**Telephone: +81 98 973 4111**

**Fax: +81 98 974 5165**

**E-mail: kishabatomoo@gmail.com**

**Total Word Count: 2448**

**Author Contributions:**

**T Kishaba, H Tamaki: Study concept and design, acquisition and interpretation of data, and drafting and finalization of the manuscript.**

**Y Shimaoka, H Fukuyama, K Yoshida, M Tanaka, S Yamashiro: Study design, and acquisition and interpretation of data.**

**Subject Heading: Mortality predictors in CPFE**

**Article Focus:** Combined pulmonary fibrosis and emphysema (CPFE) has recently been recognized as a new entity. Prognosis is often poor, and pulmonary hypertension is common. There is little information on clinical parameters and predictors of mortality.

**What is the most useful clinical predictor of mortality in CPFE?**

**What is the most informative physiologic predictor of mortality in CPFE?**

**What is the most sensitive clinical predictor of acute exacerbation in CPFE?**

**The study aim was to investigate non-invasive predictors of mortality in CPFE.**

**Key Messages:** From a clinical point of view, finger clubbing is useful predictor of mortality in CPFE. In addition, ratio of percent predicted forced expiratory volume in 1 second (%FEV<sub>1</sub>) and percent predicted forced vital capacity (%FVC) more than 1.2% were independent predictors of mortality in patients with CPFE too. Prediction of prognosis of these patients by minimally invasive methods may be quite useful.

**Strengths and Limitations:** This study's strength was the definition of noninvasive, easily obtainable clinical and physiological measures of prognosis in CPFE. The major limitation of the study is the single-center retrospective design.

#### **Abstract**

**Objectives:** Our purpose was to assess the clinical data, predictors of mortality, acute exacerbation in CPFE patients.

**Design:** Single centre retrospective cohort study.

**Setting:** Teaching hospital in Japan.

**Participants:** We identified 93 CPFE patients with high-resolution computed tomographic (HRCT) through multidisciplinary discussion. Patients who had connective tissue disease (CTD), drug-associated ILD, and occupationally related ILD, such as asbestosis and silicosis were excluded.

**Interventions:** There were no interventions.

**Methods:** Medical records and HRCT scans from January 2002 through December 2007 were reviewed retrospectively at our hospital. Ninety-three patients had CPFE.

**Results:** The mean age of CPFE patients was 74 years. IPF and nonspecific

interstitial pneumonia (NSIP) were observed as distinct HRCT patterns. **Forty two** patients showed finger clubbing. Mean serum Krebs von den Lungen-6 (KL-6) and percent predicted forced vital capacity (%FVC) were 1089 IU/L, 63.86% respectively. Twenty-two patients developed acute exacerbation during observation period. Baseline KL-6 was a strong predictor of acute exacerbation. ( Odds Ratio = 1.0016, P = 0.009 ). Finger clubbing ( Hazards Ratio = 2.2620, P = 0.015 ) and percent predicted forced expiratory volume in 1 second (%FEV<sub>1</sub> ) / % FVC more than 1.2 ( Hazards Ratio = 1.9259, P = 0.048) were independent predictors of mortality in CPFE. Conclusions: Baseline serum KL-6 was a useful predictor of acute exacerbation (cutoff = 1050, ROC: 0.7720), which occurred in 24% (22/93) of the CPFE patients. Finger clubbing and %FEV<sub>1</sub> / %FVC more than 1.2 were independent predictors of mortality.

**Key words:** mortality; acute exacerbation; finger clubbing; KL-6 ; %FEV<sub>1</sub>/%FVC

There is no additional data available

**Key words:** mortality; acute exacerbation; finger clubbing; KL-6 ; %FEV<sub>1</sub>/%FVC

**Total Abstract Count: 243**

Combined pulmonary fibrosis and emphysema (CPFE) has been recognized as a unique entity that is characterized by upper lobe emphysema and lower lobe fibrosis (1). Emphysema is sometimes associated with idiopathic pulmonary fibrosis (IPF) and usually occurs with elevated lung volume." should be "**Emphysema is sometimes recognized in the setting of idiopathic pulmonary fibrosis (IPF), (2-3) and patients with both emphysema and fibrosis (CPFE) usually have elevated lung volumes compared to patients with IPF alone.** In CPFE, lung volume is preserved in many patients, even in those at advanced stages, because supervening fibrosis offsets the effect of emphysema (3–5). CPFE patients also more often have pulmonary arterial hypertension (PAH) (6). PAH has been shown to be a significant prognostic indicator for both IPF (7,8) and

chronic obstructive pulmonary disease (COPD) (9). In patients with lung cancer, CPFE is more prevalent than fibrosis (10). Recently, CPFE syndrome has been individualized, partly on the basis of distinct characteristics observed by high-resolution computed tomography (HRCT) of the chest (11).

There is very little information on predictors of mortality for CPFE (1,12). Patients with CPFE often have severe dyspnea and poor cardiopulmonary reserve (13,14), and many patients cannot tolerate invasive procedures such as video-assisted thoracic surgery (VATS).

Thus, the objective of the present study was to determine the predictors of acute exacerbation and mortality in CPFE patients using **noninvasive methods**.

## Methods

### Study Population and HRCT Assessment

We retrospectively investigated our medical records and high-resolution computed tomographic (HRCT) scans from Okinawa Chubu Hospital, Okinawa, Japan from January 1, 2002 through December 31, 2007. During this period we had 319 interstitial lung disease (ILD) patients. Eligible patients were men and women aged 18 years or older with a proven diagnosis of IPF or nonspecific interstitial pneumonia (NSIP) according to the American Thoracic Society/ European Respiratory Society (ATS/ERS) statement (15). Among all ILD patients, we identified 93 CPFE patients through multidisciplinary discussion including our pulmonologists and radiologists. We excluded patients if; 1) they were without HRCT imaging, 2) had connective tissue disease (CTD), 3) had drug-associated ILD, and 4) had occupationally related ILD, such as asbestosis and silicosis. Demographic and clinical data were obtained, including age, gender, smoking history, dyspnea duration, comorbidity, crackles, clubbing, Krebs von den Lungen-6 (KL-6) levels and Ultrasound Cardiography (UCG) findings. In terms of pulmonary arterial hypertension (

PAH ), we estimated with UCG .We also checked physiological data including forced expiratory volume in 1 second (FEV<sub>1</sub>), %FEV<sub>1</sub>, forced vital capacity (FVC), and %FVC. We only included pulmonary function data determined within six months of the date of HRCT.

The HRCT scan imaging patterns were evaluated according to the ATS/ERS criteria (15). We diagnosed IPF patients using the new ATS/ERS and Japanese Respiratory Society /Latin America Thoracic Association criteria (16). Patients who met the following criteria, as described by Cottin et al. (1 ), were diagnosed as having CPFE: (1) the presence of emphysema on CT, defined as well-demarcated areas of decreased attenuation compared with contiguous normal lung, marginated by a very thin (<1 mm) wall or no wall, and/or multiple bullae (>1 cm) with upper-zone predominance, and (2) the presence of significant pulmonary fibrosis on CT, defined as reticular opacities with peripheral and basal predominance, with or without traction bronchiectasis that occurs with or without honeycombing. Regarding acute exacerbation, we defined by the following criteria (18):(1) sudden deterioration of dyspnea within 30 days (2) new bilateral infiltration on chest radiograph (3)pulmonary infection or other known causes were excluded by bronchoalveolar lavage(BAL). Survival time was defined from the date of HRCT to death or last observation date. The Ethics Committee of Okinawa Chubu Hospital approved this study protocol.

### **Statistical Methods**

Clinical data are presented as means  $\pm$  SDs or medians (range), depending on distribution. Group comparisons were made using unpaired t-tests, the Wilcoxon rank sum test, Chi-squared statistics, and Fisher's exact test, as appropriate. Logistic regression analysis was performed to determine the relationship between clinical parameters and acute exacerbation. A Cox proportional hazards model analysis was performed to determine the relationships between clinical parameters, physiological indices, HRCT imaging patterns and survival. Clinical data analyses were

performed using STATA software Version 11.0 (Stata Corp, College Station, TX, USA). Statistical significance was defined as a P value less than 0.05.

## Results

### Patient Characteristics, Acute Exacerbation ( AE ), and Clinical Parameters

The flow diagram in Figure 1 shows how the patients were identified. **Ninety-three CPFE patients (76 men , 17 women) were identified between 2002 and 2007.** The mean age was 73 years, and 82 % of the patients were males. The mean time from symptoms to diagnosis was 12.68 months (0–96 months). The mean follow-up period was 30.7 months (0–74.6 months). All patients had histories of smoking ( mean: 62 pack-years ). The mean modified Medical Research Council (mMRC) breathlessness score was 2.5. Bibasilar fine crackles were auscultated in all patients and forty-two ( 45 % ) had finger clubbing. The baseline percent predicted forced expiratory volume in 1 second ( $FEV_1$ ) (  $FEV_1$ /average % $FEV_1$  for similar age, sex and body composition) was 70.95%, and the baseline percent predicted forced vital capacity (FVC) was 63.86%. During observation period, sixty-seven patients ( 72 % ) died. The clinical characteristics of both survivors and non-survivors are summarized in Table 1.

The mean partial pressures of oxygen ( $PaO_2$ ) and carbon dioxide ( $PaCO_2$ ) were 63 mmHg and 43 mmHg, respectively. Thirty-two patients (34%) received home oxygen therapy and 36 ( 39% ) had pulmonary arterial hypertension. The mean systolic pulmonary arterial pressure was 62 mmHg. CPFE patients frequently have been reported to have lung cancer, especially squamous cell carcinoma (10,17). However, in our cohort, only twelve (13 %) patients developed lung cancer.

Among the 93 patients, twenty-two ( 24% ) developed AE, which met the ATS/ERS criteria (15). We performed univariate analysis to determine

**predictors of AE. Age, mMRC score, ctpattern, and baseline serum KL-6 were identified as possible predictors of AE. Logistic regression analysis was performed for these four factors, baseline serum KL-6 was found to be the strongest predictor of AE in the CPFE patients [Odds Ratio = 1.0016, P = 0.009] . ( Table 2 ) Using receiver operator characteristic curve (ROC) analysis, the useful KL-6 threshold was determined to be 1050 (ROC: 0.7720).**

### **HRCT Imaging and Predictors of Mortality**

**According to the ATS/ERS criteria (15,16 ), the patients were divided into those with UIP patterns and those with NSIP patterns. There were 68 patients in the IPF–pattern group and 25 patients in the NSIP–pattern group. The HRCT images also showed patterns indicating that 51 patients had para septal emphysema, 28 had centrilobular emphysema, and 14 had panlobular emphysema. Detailed results are presented in (Table 3).**

**The mean survival of CPFE patients was 30.7 months( 0.10–75.63 months). ( Figure 1 ). Patients with finger clubbing or increased ratio of %FEV<sub>1</sub> to %FVC showed poor survival in CPFE patients ( Figure 2) (Figure 3). Regarding ratio of %FEV<sub>1</sub> to %FVC, we chose 1.2 which was most useful threshold for predictor of mortality with using ROC analysis( ROC: 0.7671). Initially, we performed univariate analysis with a cutoff value of 0.1, which showed that baseline KL-6, finger clubbing, PaO<sub>2</sub>, and %FEV<sub>1</sub> / % FVC > 1.2 were independent predictors of mortality. Cox proportional hazards regression analysis showed that finger clubbing ( HR = 2.2620, P = 0.015 ) and ratio of %FEV<sub>1</sub> to % FVC more than 1.2 ( HR = 1.9259, P = 0.048 ) were the strongest independent predictors of mortality in CPFE patients at our hospital (Table 4).**

### **Discussion**

**Previous studies have reported a high prevalence of PAH and lung cancer in CPFE patients (1,10). These comorbidities were associated with poor**

prognosis; the 1-year survival rate for CPFE patients with PAH was only 60% (6,11). Among these patients, high mean pulmonary arterial pressure, high pulmonary vascular resistance, high heart rate, and low diffusing capacity for carbon monoxide (DLco) were significantly associated with poor outcome. In one study, CPFE patients had a five fold higher mortality risk (adjusted HR: 5.10, 95%CI:1.75–14.9) in non-malignant situations (19). In the present study, only twelve of 93 patients had lung cancer in contrast to the number reported in a previous study (10). Our institution is a teaching and community hospital, and the patient population may be different from that of a university hospital.

The pulmonary function indices of the CPFE patients included in the present study were rather different from those in previous reports (1, 20). The CPFE patients in those studies had greater preserved lung volume despite reduced DLco, reduced transfer coefficient for carbon monoxide (Kco), and hypoxemia. Jankowich, et al. reported that CPFE altered physiology but had a mortality rate similar to that of IPF (21). In addition, Peng M, et al. reported similar physiology results for CPFE (22). In our study, the mean percent predicted FVC was 63.86% and that of FEV<sub>1</sub> was 70.95%, which showed more restrictive impairment compared with previous cases. This finding can be explained by the greater volume loss of the lower lung field due to severe fibrosis rather than by the offset effect of emphysema (23). This finding might also be because our cohort had less emphysema area compared with the previously reported cases. Another possibility is that the patients might have been in a different phase of CPFE. Recently, Rogliani, et al. reported the pathology of IPF and emphysema (24). They evaluated 17 biopsy-proven usual interstitial pneumonia (UIP) patients and found fibroblasts in areas of parenchymal destruction from emphysema/UIP-expressed matrix metalloproteinase (MMP)–2, MMP–9, MMP–7 and membrane type 1 (MT1)–MMP at significantly higher levels when compared with emphysema subjects. On the basis of this result, similar to the findings of the study by Rogliani et al. cited above, interstitial fibroblast activation could be stimulated to a



greater degree in the areas of lung destruction in CPFE compared with emphysema alone, as in exaggerated tissue remodeling. Therefore, some of the CPFE patients may have had more intense fibrosis, which contributed to reduced FVC.

In the analysis of the HRCT images, the patients were divided into two groups by UIP (usual interstitial pneumonia ) pattern and NSIP pattern according to the ATS/ERS criteria (15,16). All of the UIP-pattern patients had honeycombing, and the NSIP-pattern patients more often had consolidation ( 60% vs. 29% ) and ground-glass opacity ( 100% vs. 34% ). These findings were very similar to those from a recent report on HRCT for NSIP (25). In addition, Sumikawa et al. reported that traction bronchiectasis and fibrosis scores were associated with poor prognosis in pathological UIP patients (26). In the present study, HRCT pattern was not an independent prognostic predictor. CPFE patients usually have more severe PAH, low cardiac index (6) and are disabled (27), which we observed in our cohort. Thus, most CPFE patients cannot tolerate invasive procedures such as VATS. Therefore, we cannot compare biopsy-proven UIP with CPFE equally.

Acute exacerbation ( AE ) is a relentlessly progressive status and is associated with poor outcome (28). Thus, we evaluated AE of CPFE. During the observation period ( mean: 30.7 months ), twenty-two patients (24 %) developed AE. The annual incidence of AE is 9.4%. This finding is similar to that reported in IPF recently (29). Kondoh, et al. reported that high modified MRC score, high body mass index (BMI), and decline in FVC at six months were significant independent risk factors for AE-IPF (30). KL-6 levels in ILD patients reflect the overall extent of interstitial lesions. Among the many clinical parameters, baseline serum KL-6 was the most powerful predictor of AE in our CPFE patients. ROC analysis showed that the useful threshold was 1050 ( ROC = 0.7720 ).

Finally, we investigated the prognostic predictors of CPFE in our cohort. FVC has been reported robust powerful predictor of mortality in IPF patients (31). DLco often show variable value, so reproducibility is rather poor. In addition when FVC is reduced, DLco cannot be obtained with single breath method. Therefore, we chose %FEV<sub>1</sub>, % FVC and ratio of these value as important indices out of pulmonary function parameters. Univariate analysis revealed that KL-6, finger clubbing, PaO<sub>2</sub>, and ratio of %FEV<sub>1</sub> to % FVC were independent predictors. Regression analysis using a Cox proportional hazards model showed that finger clubbing and ratio of %FEV<sub>1</sub> to % FVC more than 1.2 were the strongest independent predictors of mortality in CPFE at our hospital. In CPFE patients, lung volume is usually preserved. Therefore, absolute value of FVC or %FVC itself has been reported to be not robust predictor of critical event. However, ratio of %FEV<sub>1</sub> to % FVC may be useful parameter in subgroup of CPFE patients. In terms of different cut-off value of this ratio, CPFE patients tend to have more mild restrictive impairment compared with that of IPF patients. Another interesting finding was that finger clubbing which is associated with poor survival in CPFE patients. Finger clubbing usually shows chronicity in ILD patients. However, it predicted clinical course in CPFE patients at our cohort. So, we insist on the importance of initial careful evaluation of physical findings in CPFE.

This time, we did not evaluate the treatment in CPFE patients. Currently, there is no consensus on treatment of CPFE with PAH (32,33). This is a vital topic for future study.

There were several limitations in our study. First, this was a single center, uncontrolled design, retrospective study, which means that it is possible that important data was not collected. Second, we did not measure the exact areas of emphysema and fibrosis. Therefore, our cohort may have been at a different stage compared with previous CPFE patients. Third, most of our patients could not undergo surgical biopsy because of disability and reduced lung function. Thus, we could not evaluate the

detailed pathology of our CPFE patients. Fourth, we did not evaluate serial pulmonary function. Recently, Du Bois et al. reported that percent predicted FVC and the 24 week change in FVC were useful predictors of mortality in IPF (34). Therefore, it might be helpful to measure serial FVC as a prognostic predictor in CPFE. Lastly, in keeping with previous reports, our study patients were all heavy smokers. Therefore, we could not distinguish CPFE from smoking-related NSIP (35). However, even considering these limitations, prediction of prognosis using minimally invasive methods in these patients may be quite useful.

In conclusion, **CPFE patients showed poor survival in our cohort**. CPFE patients often develop AE, for which baseline serum KL-6 was a useful predictor. Finger clubbing and %FEV1 / % FVC more than 1.2 were independent prognostic predictors of mortality in patients with CPFE. A multicenter study of this new entity is warranted for further research.

## **ACKNOWLEDGEMENTS**

We would like to thank all residents for their time and efforts with the collection of medical records at Okinawa Chubu Hospital. In addition, we thank Dr. Yasutani for interpretation for radiological findings.

## **References**

- 1 Cottin V, Nuns H, Billet PY, et al; Group d'Etude et de Recherche sur les maladies Orphelines Pulmonaries ( GERM O P ). Combined pulmonary fibrosis and emphysema: a distinct underrecognised entity. *Eur Respir J* 2005; 26: 586–593.
2. Wiggins J, Strickland B, Turner-Warwick M. Combined cryptogenic fibrosing alveolitis and emphysema: the value of high resolution computed tomography in assessment. *Respir Med* 1990; 84: 365–369.
3. Mura M, Zompatori M, Pacilli AMG, et al. The presence of emphysema further impairs physiologic function in patients with idiopathic pulmonary fibrosis. *Respir Care* 2006; 51: 257–265.

4. Strickland NH, Hughes JM, Hart DA, et al. Cause of regional ventilation-perfusion mismatching in patients with idiopathic pulmonary fibrosis: a combined CT and scintigraphic study. *AJR Am J Roentgenol*, 1993; 161: 719–725.
5. Doherty MJ, Pearson MG, O'Grady EA, et al. Cryptogenic fibrosing alveolitis with preserved lung volumes. *Thorax* 1997; 52: 998–1002.
6. Cottin V, Le Pavec J, Prevot G, et al (GERM O P). Pulmonary hypertension in patients with combined pulmonary fibrosis and emphysema syndrome, *Eur. Respir J* 2010; 35 (1): 105–111.
7. Lettieri CJ, Nathan SD, Barnett SD, et al. Prevalence and outcomes of pulmonary arterial hypertension in advanced idiopathic pulmonary fibrosis. *Chest* 2006; 129: 746–752.
8. Hamada K, Nagai S, Tanaka S, et al. Significance of pulmonary arterial pressure and diffusion capacity of the lung as prognosticator in patients with idiopathic pulmonary fibrosis. *Chest* 2007; 131: 650–656.
9. Oswald-Mammosser M, Weitzenblum E, Quoix E, et al. Prognostic factors in COPD patients receiving long-term oxygen therapy. Importance of pulmonary artery pressure. *Chest* 1995; 107: 1193–1198.
10. Usui K, Tanai C, Tanaka Y, et al. The prevalence of pulmonary fibrosis combined with emphysema in patients with lung cancer. *Respirology* 2011; 16: 326–331.
11. Cottin V, Cordier JF. The syndrome of combined pulmonary fibrosis and emphysema. *Chest* 2009; 136: 1–2.
12. Mejia M, Carrillo G, Rojas-Serrano J, et al. Idiopathic pulmonary fibrosis and emphysema: decreased survival associated with severe pulmonary arterial hypertension. *Chest* 2009; 136: 10–15.
13. Thabut G, Dauriat G, Stern JB, et al. Pulmonary hemodynamics in advanced COPD candidates for lung volume reduction surgery or lung transplantation. *Chest* 2005; 127: 1531–1536.
14. Chauat A, Naeije R, Weitzenblum E. Pulmonary hypertension in COPD. *Eur Respir J* 2008; 32: 1371–1385.

15. American Thoracic Society. American Thoracic Society/European Respiratory Society International Multidisciplinary Consensus Classification of the Idiopathic Interstitial Pneumonias. *Am J Respir Crit Care Med* 2002; 165: 277–304.
16. Raghu G, Collard H, Egan J, et al; ATS/ERS/JRS/ALAT Committee on Idiopathic Pulmonary Fibrosis. An Official ATS/ERS/JRS/ALAT Statement: Idiopathic Pulmonary Fibrosis: Evidence-based Guidelines for Diagnosis and Management. *Am J Respir Crit Care Med* 2011;183: 788–824.
17. Kitaguchi Y, Fujimoto K, Hanaoka M, et al. Clinical characteristics of combined pulmonary fibrosis and emphysema. *Respirology* 2010;156:265–271.
18. Collard HR, Moore BB, Flaherty KR, et al. Idiopathic Pulmonary Fibrosis Clinical Research Network Investigators. Acute exacerbations of idiopathic pulmonary fibrosis. *Am J Respir Crit Care Med* 2007;176:636–643.
19. Lee CH, Kim HJ, Park CM, et al. The impact of combined pulmonary fibrosis and emphysema on mortality. *Int J Tuberc Lung Dis* 2011; 15(8):1111–1116.
20. Akagi T, Matsumoto T, Harada T, et al. Coexistent emphysema delays the decrease of vital capacity in idiopathic pulmonary fibrosis. *Respir Med*. 2009; 103(8):1209–1215.
21. Jankowich MD, Rounds S. Combined pulmonary fibrosis and emphysema alters physiology but has similar mortality to pulmonary fibrosis without emphysema. *Lung* 2010; 188(5): 365–373.
22. Peng M, Cai F, Tian XL, et al. Combined pulmonary fibrosis and emphysema syndrome. *Zhonghua Jie He He Hu Xi Za Zhi* 2010; 33(7): 515–518.
23. Wells A, Desai S, Rubens M, et al. Idiopathic Pulmonary Fibrosis: A Composite Physiologic Index Derived from Disease Extent Observed by Computed Tomography. *Am J Respir Crit Care Med* 2003; 167: 962–969.
24. Rogliani P, Mura M, Mattia P, et al. HRCT and histopathological evaluation of fibrosis and tissue destruction in IPF associated with pulmonary emphysema. *Respir Med* 2008;102(12):1753–1761.
25. Hozumi H, Nakamura Y, Johkoh T, et al. Nonspecific Interstitial Pneumonia: Prognostic Significance of High-Resolution Computed Tomography in 59 Patients. *J Comput Assist Tomogr* 2011; 35: 583–589.

26. Sumikawa H, Johkoh T, Colby T, et al. Computed Tomography Findings in Pathological Usual Interstitial Pneumonia □ Relationship to Survival. *Am J Respir Crit Care Med* 2008;177:433–439.
27. Nathan SD, Shlobin OA, Barnett SD, et al. Right ventricular systolic pressure by echocardiography as a predictor of pulmonary hypertension in idiopathic pulmonary fibrosis. *Respir Med* 2008; 102: 1305–1310.
28. Ley B, Collard H, King T. Clinical Course and Prediction of Survival in Idiopathic Pulmonary Fibrosis. *Am J Respir Crit Care Med* 2011;183:431–440.
29. Song JW, Hong SB, Lim CM, et al. Acute exacerbation of idiopathic pulmonary fibrosis: incidence, risk factors and outcome. *Eur Respir J* 2011; 37: 356–363.
30. Kondoh Y, Taniguchi H, Katsuta T, et al. Risk factors of acute exacerbation of idiopathic pulmonary fibrosis. *Sarcoidosis Vasc Diffuse Lung Dis* 2010 July; 27(2):103–110.
31. Roland M. du Bois, Derek Weycker, Carlo Albera, et al. Forced Vital Capacity in Patients with Idiopathic Pulmonary Fibrosis. Test Properties and Minimal Clinically Important Difference. *Am J Respir Crit Care Med* 2011;184:1382-1389.
32. Cushley MJ, Davison AG, du Bois RM, et al. The diagnosis, assessment and treatment of diffuse parenchymal lung disease in adults. *Thorax* 1999; 54: S1–S30.
33. Portillo Carroz K, Roldan Sanchez J, Morera Prat J. Combined pulmonary fibrosis and emphysema. *Arch Bronchoneumol* 2010; 46(12):646–51.
34. du Bois R, Weycker D, Albera C, et al. Ascertainment of Individual Risk of Mortality for Patients with Idiopathic Pulmonary Fibrosis. *Am J Respir Crit Care Med* 2011;184:459–466.
35. Marten K, Milne D, Antoniou K, et al. Non-specific interstitial pneumonia in cigarette smokers: a CT study. *Eur Radiol* 2009; 19: 1679–1685.

## **Figure Legends:**

### **Figure 1; Flow diagram in CPFE patients**

Figure 2; Survival curve in CPFE patients

Figure 3; CPFE patients with clubbing show poor survival compared with that of without clubbing

Figure 4; Ratio of %FEV1 and %FVC more than 1.2 show poor survival rather than that of less than 1.2 in CPFE patients

TABLE 1. Patient clinical characteristics in CPFE

|                            | Survivors<br>( n= 26 )         | Non-survivors<br>( n= 67 )     | p-value  |
|----------------------------|--------------------------------|--------------------------------|----------|
| Age, year (mean)           | 73.19 ± 1.18<br>(57-84)        | 73.83 ± 7.07<br>(56-91)        | 0.5815   |
| Male sex, %                | 85                             | 81                             | 0.6570   |
| Pack-year                  | 60 ± 22.0( 5-110 )             | 64 ± 31.4 ( 0-180 )            | 0.5754   |
| mMRC scale                 | 2.6 ± 0.88 ( 1-4 )             | 2.5 ± 0.93 ( 1-4 )             | 0.5091   |
| Dyspnea duration<br>months | 11.04 ± 5.73<br>( 0-18 )       | 13.07 ± 14.20<br>( 0-96 )      | 0.4821   |
| Clubbing, %                | 12                             | 55                             | < 0.0001 |
| KL-6, IU/L                 | 852 ± 278<br>( 505-1200 )      | 1174 ± 725<br>( 201-4250 )     | 0.0413   |
| Systolic PAP,<br>mmHg      | 45                             | 75                             | < 0.0001 |
| Baseline FEV1,%            | 71.14 ± 8.72<br>( 59.6-103.9 ) | 70.88 ± 9.25<br>( 31.4-106.3 ) | 0.9128   |

|                                           |                                            |                                             |                    |
|-------------------------------------------|--------------------------------------------|---------------------------------------------|--------------------|
| <b>Baseline FVC, %</b>                    | <b>68.52 ± 9.09</b><br><b>( 57-99.7 )</b>  | <b>61.89 ± 9.48</b><br><b>( 24.9-82.3 )</b> | <b>0.0058</b>      |
| <b>HOT , %</b>                            | <b>12</b>                                  | <b>43</b>                                   | <b>0.0035</b>      |
| <b>Paraseptal emphysema, %</b>            | <b>19</b>                                  | <b>69</b>                                   | <b>&lt; 0.0001</b> |
| <b>Acute exacerbation, n(%)</b>           | <b>0 (0)</b>                               | <b>22 (32)</b>                              | <b>0.0007</b>      |
| <b>%FEV<sub>1</sub> / %FVC &gt;1.2, %</b> | <b>19</b>                                  | <b>79</b>                                   | <b>&lt; 0.0001</b> |
| <b>Cancer, %</b>                          | <b>0</b>                                   | <b>18</b>                                   | <b>0.1068</b>      |
| <b>Cardiovascular, %</b>                  | <b>27</b>                                  | <b>40</b>                                   | <b>0.2339</b>      |
| <b>Ejection fraction. %</b>               | <b>58.2 ± 3.90</b>                         | <b>56.9 ± 5.19</b>                          | <b>0.2337</b>      |
| <b>Survival time , months</b>             | <b>50.16 ± 17.79</b><br><b>( 26 – 96 )</b> | <b>25.68 ± 21.54</b><br><b>( 1 – 98 )</b>   | <b>&lt; 0.0001</b> |

Data are presented as mean ± SD and mean %predicted ± SD

Definitions of abbreviations: IPF = Idiopathic Pulmonary Fibrosis; NSIP = Non Specific Interstitial Pneumonia; mMRC = modified Medical Research Council; FEV<sub>1</sub>= forced expired volume in one second; FVC = forced vital capacity; **HOT = Home Oxygen Therapy**

**Table 2. Predictor of acute exacerbation in CPFE patients**



|                         | <b>Odds Ratio</b> | <b>95% CI</b>        | <b>p-value</b> |
|-------------------------|-------------------|----------------------|----------------|
| <b>Age</b>              | <b>0.9691</b>     | <b>0.8985-1.0453</b> | <b>0.417</b>   |
| <b>mMRC scale</b>       | <b>0.6681</b>     | <b>0.3538-1.2616</b> | <b>0.214</b>   |
| <b>Dyspnea duration</b> | <b>0.8967</b>     | <b>0.8169-0.9844</b> | <b>0.022</b>   |
| <b>Baseline KL-6</b>    | <b>1.0016</b>     | <b>1.0003-1.0027</b> | <b>0.009</b>   |
| <b>CT pattern</b>       | <b>0.7612</b>     | <b>0.2247-2.5779</b> | <b>0.661</b>   |

**Definitions of abbreviations: CI= confidence interval, mMRC = modified Medical Research Council**

**Table 3. HRCT Imaging in CPFE patients**

|                                   | <b>UIP<br/>pattern<br/>( n=68 )</b> | <b>NSIP<br/>Pattern<br/>( n= 25 )</b> | <b>All<br/>( n= 93 )</b> |
|-----------------------------------|-------------------------------------|---------------------------------------|--------------------------|
| <b>Emphysema<br/>pattern</b>      |                                     |                                       |                          |
| <b>Paraseptal,%</b>               | <b>57</b>                           | <b>48</b>                             | <b>55</b>                |
| <b>Centrilobular,%</b>            | <b>29</b>                           | <b>32</b>                             | <b>30</b>                |
| <b>Panlobular,%</b>               | <b>14</b>                           | <b>20</b>                             | <b>15</b>                |
| <b>Fibrosis pattern</b>           |                                     |                                       |                          |
| <b>Traction bronchiectasis, %</b> | <b>96</b>                           | <b>88</b>                             | <b>94</b>                |
| <b>Reticulation, %</b>            | <b>91</b>                           | <b>88</b>                             | <b>90</b>                |
| <b>Honeycombing, %</b>            | <b>100</b>                          | <b>0</b>                              | <b>73</b>                |
| <b>Ground glass opacity , %</b>   | <b>34</b>                           | <b>100</b>                            | <b>52</b>                |
| <b>Consolidation, %</b>           | <b>29</b>                           | <b>60</b>                             | <b>38</b>                |

**Definitions of abbreviations: HRCT = High resolution computed tomography ; IPF = Idiopathic pulmonary fibrosis ; NSIP = Non specific interstitial pneumonia.**

**Table 4. Results of the Cox proportional hazards regression analysis of mortality in CPFE patients**

|                                               | <b>Hazards ratio</b> | <b>95% CI</b>        | <b>P-value</b> |
|-----------------------------------------------|----------------------|----------------------|----------------|
| <b>Finger clubbing</b>                        | <b>2.2620</b>        | <b>1.1746-4.3560</b> | <b>0.015</b>   |
| <b>%FEV<sub>1</sub>/%FVC<br/>( &gt; 1.2 )</b> | <b>1.9259</b>        | <b>1.0057-3.6883</b> | <b>0.048</b>   |

**Definitions of abbreviations: CI = confidence interval ; FVC = forced vital capacity.**
