# Supplementary material for: A cohort study of mortality predictors and characteristics of patients with combined pulmonary fibrosis and emphysema
Source: PubMed Central journal article supplement — BMJ Open. 2012 May 15;2(3):e000988. doi: 10.1136/bmjopen-2012-000988 (PMC3358615; doi:10.1136/bmjopen-2012-000988), 2012-05-15
Supplement: bmjopen-2012-000988.draft_revisions.pdf [file bmjopen-2012-000988.draft_revisions.pdf]

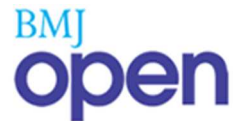

**A Cohort Study of mortality predictors and characteristics of patients with combined pulmonary fibrosis and emphysema**

|                                 |                                                                                                                                                                                                                                                                                                                                                                                                                                                     |
|---------------------------------|-----------------------------------------------------------------------------------------------------------------------------------------------------------------------------------------------------------------------------------------------------------------------------------------------------------------------------------------------------------------------------------------------------------------------------------------------------|
| Journal:                        | <i>BMJ Open</i>                                                                                                                                                                                                                                                                                                                                                                                                                                     |
| Manuscript ID:                  | bmjopen-2012-000988                                                                                                                                                                                                                                                                                                                                                                                                                                 |
| Article Type:                   | Research                                                                                                                                                                                                                                                                                                                                                                                                                                            |
| Date Submitted by the Author:   | 06-Feb-2012                                                                                                                                                                                                                                                                                                                                                                                                                                         |
| Complete List of Authors:       | Kishaba, Tomoo; Okinawa Chubu Hospital, Respiratory Medicine<br>Shimaoka, Yousuke; Okinawa Chubu Hospital, Respiratory medicine<br>Fukuyama, Hajime; Okinawa Chubu Hospital, Respiratory medicine<br>Yoshida, Kyoko; Nakamura Clinic, Home care<br>Tanaka, Maki; Kurashiki Central Hospital, Respiratory medicine<br>Yamashiro, Shin; Okinawa Chubu Hospital, Respiratory medicine<br>Tamaki, Hitoshi; Okinawa Chubu Hospital, Respiratory medicine |
| <b>Primary Subject Heading</b>: | Respiratory medicine                                                                                                                                                                                                                                                                                                                                                                                                                                |
| Secondary Subject Heading:      | Respiratory medicine                                                                                                                                                                                                                                                                                                                                                                                                                                |
| Keywords:                       | THORACIC MEDICINE, Interstitial lung disease < THORACIC MEDICINE,<br>Respiratory physiology < THORACIC MEDICINE                                                                                                                                                                                                                                                                                                                                     |
|                                 |                                                                                                                                                                                                                                                                                                                                                                                                                                                     |

SCHOLARONE™  
Manuscripts

Peer review only

1  
2  
3  
4  
5  
6 **Mortality predictors and characteristics of patients with combined**  
7 **pulmonary fibrosis and emphysema**  
8

9  
10 **Tomoo Kishaba<sup>1</sup>, Yousuke Shimaoka<sup>1</sup>, Hajime Fukuyama<sup>1</sup>, Kyoko Yoshida<sup>2</sup>,**  
11 **Maki Noyama<sup>3</sup>, Shin Yamashiro<sup>1</sup>, Hitoshi Tamaki<sup>1</sup>**  
12

13  
14 **<sup>1</sup>Department of Respiratory Medicine, Okinawa Chubu Hospital, Okinawa,**  
15  
16  
17 **Japan**  
18

19 **<sup>2</sup> Department of home care, Nakamura Clinic**  
20

21  
22 **<sup>3</sup> Department of Respiratory Medicine, Kurashiki Central Hospital**  
23  
24

25 **Corresponding author and request for reprints:**  
26

27  
28 **Tomoo Kishaba**  
29

30 **Department of Respiratory Medicine, Okinawa Chubu Hospital**  
31

32  
33 **Miyazato 281, Uruma City, Okinawa 904-2293, Japan**  
34

35  
36 **Telephone: +81 98 973 4111**  
37

38  
39 **Fax: +81 98 974 5165**  
40

41 **E-mail: kishabatomoo@gmail.com**  
42  
43

44 **Total Word Count: 2763**  
45

46  
47 **Author Contributions:**  
48

49 **T Kishaba, H Tamaki: Study concept and design, acquisition and**  
50 **interpretation of data, and drafting and finalization of the manuscript.**  
51  
52

53  
54 **Y Shimaoka, H Fukuyama, K Yoshida, M Tanaka, S Yamashiro: Study**  
55 **design, and acquisition and interpretation of data.**  
56  
57  
58  
59  
60

1  
2  
3  
4  
5  
6  
7  
8 **Subject Heading: Mortality predictors in CPFE**  
9

10  
11 **Article Focus:** Combined pulmonary fibrosis and emphysema (CPFE) has  
12 recently been recognized as a new entity. Prognosis is often poor, and  
13 pulmonary hypertension is common. There is little information on clinical  
14 parameters and predictors of mortality.  
15

16  
17 **What is the most useful clinical predictor of mortality in CPFE?**

18 **What is the most informative physiologic predictor of mortality in CPFE?**

19 **The aim of the study is to investigate predictor of mortality in CPFE with**  
20 **less invasive way.**  
21  
22

23  
24  
25 **Key Messages:** Clinical point of view, finger clubbing is useful predictor of  
26 mortality in CPFE. In addition, ratio of percent predicted forced expiratory  
27 volume in 1 second (%FEV<sub>1</sub>) and percent forced vital capacity (%FVC)  
28 more than 1.2% were independent predictors of mortality in patients with  
29 CPFE too. Prediction of prognosis of these patients by minimally invasive  
30 methods may be quite useful.  
31  
32  
33

34  
35  
36 **Strengths and Limitations:**We investigated all available clinical and  
37 physiological data with minimally invasive way. Therefore, most hospitals  
38 can refer our result easily. And we compared CPFE with IPF patients.  
39 Therefore, our result may be more robust. However, this is single center  
40 study. So, our result cannot be generalizable to other hospital's patients.  
41 We will require multi-centre study for confirmation.  
42  
43  
44

45  
46 **Abstract**  
47

48 **Objectives:** Our purpose was to assess the clinical data, predictors of  
49 mortality, acute exacerbation of CPFE patients and compared that of  
50 idiopathic pulmonary fibrosis (IPF) patients.  
51

52 **Design:**Single centre retrospective cohort study.  
53

54 **Setting:**Teaching hospital in Japan.  
55  
56  
57  
58  
59  
60

1  
2  
3  
4  
5  
6  
7  
8  
9  
10  
11  
12  
13  
14  
15  
16  
17  
18  
19  
20  
21  
22  
23  
24  
25  
26  
27  
28  
29  
30  
31  
32  
33  
34  
35  
36  
37  
38  
39  
40  
41  
42  
43  
44  
45  
46  
47  
48  
49  
50  
51  
52  
53  
54  
55  
56  
57  
58  
59  
60

**Participants:** Ninety-three patients had CPFE and one hundred and fifty-two IPF patients were identified. We identified 93 CPFE patients with high-resolution computed tomographic (HRCT) through multidisciplinary discussion. Patients who had connective tissue disease (CTD), drug-associated ILD, and occupationally related ILD, such as asbestosis and silicosis were excluded.

**Interventions:** There were no interventions.

**Methods:** Medical records and HRCT scans from January 2002 through December 2007 were reviewed retrospectively at our hospital. Ninety-three patients had CPFE and one hundred and fifty-two IPF patients were identified during same period.

**Results:** The mean age of CPFE patients was 74 years. IPF and nonspecific interstitial pneumonia (NSIP) were observed as distinct HRCT patterns. Forty-two patients showed finger clubbing. Mean serum Krebs von den Lungen-6 (KL-6) and percent predicted forced vital capacity (%FVC) were 1089 IU/L, 63.86% respectively. Twenty-two patients developed acute exacerbation during observation period. Baseline KL-6 was a strong predictor of acute exacerbation. ( Odds Ratio = 1.0009, P = 0.027 ). Finger clubbing ( Hazards Ratio = 2.2620, P = 0.015 ) and percent predicted forced expiratory volume in 1 second (%FEV<sub>1</sub>) / %FVC more than 1.2 ( Hazards Ratio = 1.9259, P = 0.048) were independent predictors of mortality in CPFE.

**Conclusions:** Serum KL-6 was a useful predictor of acute exacerbation (cutoff = 1050, ROC: 0.7720), which occurred in 24% (22/93) of the CPFE patients. Finger clubbing and %FEV<sub>1</sub>/ %FVC more than 1.2 were independent predictors of mortality.

**Key words:** mortality; acute exacerbation; finger clubbing; KL-6 ; %FEV<sub>1</sub>/ %FVC

There is no additional data available.

**Total Abstract Count: 276**

1  
2  
3  
4  
5  
6  
7  
8  
9  
10  
11  
12  
13  
14  
15  
16  
17  
18  
19  
20  
21  
22  
23  
24  
25  
26  
27  
28  
29  
30  
31  
32  
33  
34  
35  
36  
37  
38  
39  
40  
41  
42  
43  
44  
45  
46  
47  
48  
49  
50  
51  
52  
53  
54  
55  
56  
57  
58  
59  
60

Combined pulmonary fibrosis and emphysema (CPFE) has been recognized as a unique entity that is characterized by upper lobe emphysema and lower lobe fibrosis (1). Emphysema has been associated with heavy smoker's idiopathic pulmonary fibrosis (IPF)(2–3) and usually occurs with elevated lung volume. On the other hand, IPF is associated with a progressive decline in lung volume. In CPFE, lung volume is preserved in many patients, even in those at advanced stages, because supervening fibrosis offsets the effect of emphysema (3–5). CPFE patients also more often have pulmonary arterial hypertension (PAH) (6). PAH has been shown to be a significant prognostic indicator for both IPF (7,8) and chronic obstructive pulmonary disease (COPD) (9). In patients with lung cancer, CPFE is more prevalent than fibrosis (10). Recently, CPFE syndrome has been individualized, partly on the basis of distinct characteristics observed by high-resolution computed tomography (HRCT) of the chest (11).

There is very little information on predictors of mortality for CPFE (1,12). Patients with CPFE often have severe dyspnea and poor cardiopulmonary reserve (13,14), and many patients cannot tolerate invasive procedures such as video-assisted thoracic surgery (VATS).

Thus, the objective of the present study was to determine the predictors of acute exacerbation and mortality in CPFE patients using minimally invasive methods.

## Methods

### Study Population and HRCT Assessment

This study is retrospective cohort study. We retrospectively investigated our medical records and high-resolution computed tomographic (HRCT) scans from Okinawa Chubu Hospital, Okinawa, Japan from January 1, 2002 through December 31, 2007. During this period we had 319 interstitial lung disease(ILD) patients, among them we had 152 IPF patients. Eligible patients were men and women aged 18 years or older with a proven

1  
2  
3  
4  
5  
6  
7  
8  
9  
10  
11  
12  
13  
14  
15  
16  
17  
18  
19  
20  
21  
22  
23  
24  
25  
26  
27  
28  
29  
30  
31  
32  
33  
34  
35  
36  
37  
38  
39  
40  
41  
42  
43  
44  
45  
46  
47  
48  
49  
50  
51  
52  
53  
54  
55  
56  
57  
58  
59  
60

diagnosis of IPF or nonspecific interstitial pneumonia (NSIP) according to the American Thoracic Society/ European Respiratory Society (ATS/ERS) statement (15). Among all ILD patients, we identified 93 CPFE patients through multidisciplinary discussion. We excluded patients if; 1) they were without HRCT imaging, 2) had connective tissue disease (CTD), 3) had drug-associated ILD, and 4) had occupationally related ILD, such as asbestosis and silicosis. Demographic and clinical data were obtained, including age, gender, smoking history, dyspnea duration, crackles, clubbing, and Krebs von den Lungen-6 (KL-6) levels. We also checked physiological data including forced expiratory volume in 1 second (FEV<sub>1</sub>), %FEV<sub>1</sub>, forced vital capacity (FVC), and %FVC. We only included pulmonary function data determined within six months of the date of HRCT.

The HRCT scan imaging patterns were evaluated according to the ATS/ERS criteria (15). We diagnosed IPF patients using the new ATS/ERS and Japanese Respiratory Society /Latin America Thoracic Association criteria (16). Patients who met the following criteria, as described by Cottin et al. (1), were diagnosed as having CPFE: (1) the presence of emphysema on CT, defined as well-demarcated areas of decreased attenuation compared with contiguous normal lung, margined by a very thin (<1 mm) wall or no wall, and/or multiple bullae (>1 cm) with upper-zone predominance, and (2) the presence of significant pulmonary fibrosis on CT, defined as reticular opacities with peripheral and basal predominance, with or without traction bronchiectasis that occurs with or without honeycombing. The Ethics Committee of Okinawa Chubu Hospital approved this study protocol.

### Statistical Methods

Clinical data are presented as means  $\pm$  SDs or medians (range), depending on distribution. Group comparisons were made using unpaired t-tests, the Wilcoxon rank sum test, Chi-squared statistics, and Fisher's exact test, as appropriate. A Cox proportional hazards model analysis was performed to

1  
2  
3  
4  
5  
6  
7  
8  
9  
10  
11  
12  
13  
14  
15  
16  
17  
18  
19  
20  
21  
22  
23  
24  
25  
26  
27  
28  
29  
30  
31  
32  
33  
34  
35  
36  
37  
38  
39  
40  
41  
42  
43  
44  
45  
46  
47  
48  
49  
50  
51  
52  
53  
54  
55  
56  
57  
58  
59  
60

determine the relationships between clinical parameters, physiological indices, HRCT imaging patterns and survival. Clinical data analyses were performed using STATA software Version 11.0 (Stata Corp, College Station, TX, USA). Statistical significance was defined as a P value less than 0.05.

## Results

### Patient Characteristics, Acute Exacerbation ( AE ), and Clinical Parameters

Ninety-three CPFE patients were (76 men , 17 women) were identified between 2002 and 2007. The mean age was 73 years, and 82 % of the patients were males. The mean time from symptoms to diagnosis was 12.68 months (0–96 months). The mean follow-up period was 30.7 months (0–74.6 months). All patients had histories of smoking ( mean: 62 pack-years ). The mean modified Medical Research Council (mMRC) breathlessness score was 2.5. During same period we had three hundred nineteen ILD patients, among them we had one hundred and fifty-two IPF patients. Therefore, we compared CPFE clinical parameters with that of IPF patients. Modified MRC scores was similar. ( 2.6 vs. 2.5 , P = 0.1002). IPF patients showed more longer dyspnea durations compared with those of CPFE patients. ( 17.04 vs. 12.98 months; P = 0.0002) Bibasilar fine crackles were auscultated in all patients and forty-two ( 45 % ) had finger clubbing. The baseline percent predicted forced expiratory volume in 1 second (FEV<sub>1</sub>) ( FEV<sub>1</sub>/average %FEV<sub>1</sub> for similar age, sex and body composition) was 70.95%, and the baseline percent predicted forced vital capacity (FVC) was 63.86%. The clinical characteristics of the patients are summarized in Table 1.

The mean partial pressures of oxygen (PaO<sub>2</sub>) and carbon dioxide (PaCO<sub>2</sub>) were 63 mmHg and 43 mmHg, respectively. Forty-two patients (30%) received home oxygen therapy and 36 ( 39% ) had pulmonary arterial hypertension. The mean systolic pulmonary arterial pressure was 62.76 mmHg. CPFE patients frequently have been reported to have lung cancer,

1  
2  
3  
4  
5 especially squamous cell carcinoma (10,17). However, in our cohort, only  
6 twelve (13 %) patients developed lung cancer.  
7  
8

9  
10 Among the 93 patients, twenty-two ( 24% ) developed AE, which met the  
11 ATS/ERS criteria (15). We performed univariate analysis to determine  
12 predictors of AE. Age, mMRC score, dyspnea duration, and serum KL-6  
13 were identified as possible predictors of AE. Multivariate regression  
14 analysis was performed for these four factors, serum KL-6 was found to be  
15 the strongest predictor of AE in the CPFE patients [Odds Ratio = 1.0009, P  
16 = 0.027] . Using receiver operator characteristic curve (ROC) analysis, the  
17 useful KL-6 threshold was determined to be 1050 (ROC: 0.7720).  
18  
19  
20  
21  
22

### 23 24 HRCT Imaging and Predictors of Mortality

25  
26 According to the ATS/ERS criteria (15,16 ), the patients were divided into  
27 those with IPF patterns and those with NSIP patterns. There were 68  
28 patients in the IPF–pattern group and 25 patients in the NSIP–pattern  
29 group. The HRCT images also showed patterns indicating that 51 patients  
30 had para septal emphysema, 28 had centrilobular emphysema, and 14 had  
31 panlobular emphysema. Detailed results are presented in Table 2.  
32  
33  
34  
35

36  
37 The mean survival of CPFE patients was 30.7 months( 0.10–75.63 months).  
38 On the other hand, mean survival of IPF patients was 34.5 months  
39 ( 6.79-72.95 months) which was statistically significant( p = 0.0411 )  
40 ( Figure 1 ). Patients with finger clubbing or increased ratio of %FEV<sub>1</sub>  
41 to %FVC showed poor survival in CPFE patients ( Figure 2) (Figure 3).  
42 Regarding ratio of %FEV<sub>1</sub> to %FVC, we chose 1.2 which was most useful  
43 threshold for predictor of mortality with using ROC analysis( ROC: 0.7671).  
44 In IPF patients in our cohort, useful cut off value of ratio of %FEV<sub>1</sub> to %FVC  
45 was 1.5 ( Figure 4 )(ROC: 0.8622). Initially, we performed univariate  
46 analysis with a cutoff value of 0.1, which showed that KL-6, finger clubbing,  
47 PaO<sub>2</sub>, and %FEV<sub>1</sub> / % FVC > 1.2 were independent predictors of mortality  
48 (Table 3). Cox proportional hazards regression analysis showed that finger  
49 clubbing ( HR = 2.2620, P = 0.015 ) and ratio of %FEV<sub>1</sub> to % FVC more than  
50  
51  
52  
53  
54  
55  
56  
57  
58  
59  
60



1  
2  
3  
4  
5 1.2 ( HR = 1.9259, P = 0.048 ) were the strongest independent predictors of  
6 mortality in CPFE patients at our hospital (Table 4).  
7  
8

## 9 Discussion

10  
11  
12 Previous studies have reported a high prevalence of PAH and lung cancer  
13 in CPFE patients (1,10). These comorbidities were associated with poor  
14 prognosis; the 1-year survival rate for CPFE patients with PAH was only  
15 60% (6,11). Among these patients, high mean pulmonary arterial pressure,  
16 high pulmonary vascular resistance, high heart rate, and low diffusing  
17 capacity for carbon monoxide (DLco) were significantly associated with  
18 poor outcome. In one study, CPFE patients had a five fold higher mortality  
19 risk (adjusted HR: 5.10, 95%CI:1.75–14.9) in non-malignant situations (19).  
20 In the present study, only twelve of 93 patients had lung cancer in contrast  
21 to the number reported in a previous study (10). Our institution is a  
22 teaching and community hospital, and the patient population may be  
23 different from that of a university hospital.  
24  
25  
26  
27  
28  
29  
30  
31  
32

33 The pulmonary function indices of the CPFE patients included in the  
34 present study were rather different from those in previous reports (1, 20).  
35 The CPFE patients in those studies had greater preserved lung volume  
36 despite reduced DLco, reduced transfer coefficient for carbon monoxide  
37 (Kco), and hypoxemia. Jankowich, et al. reported that CPFE altered  
38 physiology but had a mortality rate similar to that of IPF (21). In addition,  
39 Peng M, et al. reported similar physiology results for CPFE (22). In our  
40 study, the mean percent predicted FVC was 63.86% and that of FEV<sub>1</sub> was  
41 70.95%, which showed more restrictive impairment compared with  
42 previous cases. This finding can be explained by the greater volume loss  
43 of the lower lung field due to severe fibrosis rather than by the offset effect  
44 of emphysema (23). This finding might also be because our cohort had  
45 less emphysema area compared with the previously reported cases.  
46 Another possibility is that the patients might have been in a different  
47 phase of CPFE. Recently, Rogliani, et al. reported the pathology of IPF and  
48  
49  
50  
51  
52  
53  
54  
55  
56  
57  
58  
59  
60

1  
2  
3  
4  
5  
6  
7  
8  
9  
10  
11  
12  
13  
14  
15  
16  
17  
18  
19  
20  
21  
22  
23  
24  
25  
26  
27  
28  
29  
30  
31  
32  
33  
34  
35  
36  
37  
38  
39  
40  
41  
42  
43  
44  
45  
46  
47  
48  
49  
50  
51  
52  
53  
54  
55  
56  
57  
58  
59  
60

emphysema (24). They evaluated 17 biopsy-proven usual interstitial pneumonia (UIP) patients and found fibroblasts in areas of parenchymal destruction from emphysema/UIP-expressed matrix metalloproteinase (MMP)–2, MMP–9, MMP–7 and membrane type 1 (MT1)–MMP at significantly higher levels when compared with emphysema subjects. On the basis of this result, similar to the findings of the study by Rogliani et al. cited above, interstitial fibroblast activation could be stimulated to a greater degree in the areas of lung destruction in CPFE compared with emphysema alone, as in exaggerated tissue remodeling. Therefore, some of the CPFE patients may have had more intense fibrosis, which contributed to reduced FVC.

In the analysis of the HRCT images, the patients were divided into two groups by IPF pattern and NSIP pattern according to the ATS/ERS criteria (15,16). All of the IPF-pattern patients had honeycombing, and the NSIP-pattern patients more often had consolidation ( 60% vs. 29% ) and ground-glass opacity ( 34% vs. 100% ). These findings were very similar to those from a recent report on HRCT for NSIP (25). In addition, Sumikawa et al. reported that traction bronchiectasis and fibrosis scores were associated with poor prognosis in pathological UIP patients (26). In the present study, HRCT pattern was not an independent prognostic predictor. CPFE patients usually have more severe PAH, low cardiac index (6) and are disabled (27), which we observed in our cohort. Thus, most CPFE patients cannot tolerate invasive procedures such as VATS. Therefore, we cannot compare biopsy-proven UIP with CPFE equally.

Acute exacerbation ( AE ) is a relentlessly progressive status and is associated with poor outcome (28). Thus, we investigated AE of CPFE. During the observation period ( mean: 30.7 months ), twenty-two patients (24 %) developed AE. The annual incidence of AE is 9.4%. This finding is similar to that reported in IPF recently (29). Kondoh, et al. reported that high modified MRC score, high body mass index (BMI), and decline in FVC at six months were significant independent risk factors for AE-IPF (30).

1  
2  
3  
4  
5  
6  
7  
8  
9  
10  
11  
12  
13  
14  
15  
16  
17  
18  
19  
20  
21  
22  
23  
24  
25  
26  
27  
28  
29  
30  
31  
32  
33  
34  
35  
36  
37  
38  
39  
40  
41  
42  
43  
44  
45  
46  
47  
48  
49  
50  
51  
52  
53  
54  
55  
56  
57  
58  
59  
60

**KL-6 levels in ILD patients reflect the overall extent of interstitial lesions. Among the many clinical parameters, serum KL-6 was the most powerful predictor of AE in our CPFE patients. ROC analysis showed that the useful threshold was 1050 ( ROC = 0.7720 ).**

**Finally, we investigated the prognostic predictors of CPFE in our cohort. FVC has been reported robust powerful predictor of mortality in IPF patients (31). DLco often show variable value, so reproducibility is rather poor. In addition when FVC is reduced, DLco cannot be obtained with single breath method. Therefore, we chose %FEV<sub>1</sub> ,% FVC and ratio of these value as important indices out of pulmonary function parameters. Univariate analysis revealed that KL-6, finger clubbing, PaO<sub>2</sub>, and ratio of %FEV<sub>1</sub> to % FVC were independent predictors. Regression analysis using a Cox proportional hazards model showed that finger clubbing and ratio of %FEV<sub>1</sub> to % FVC more than 1.2 were the strongest independent predictors of mortality in CPFE at our hospital. On the other hand, ratio of %FEV<sub>1</sub> to % FVC more than 1.5 was useful threshold for mortality in IPF patients. In CPFE patients, lung volume is usually preserved. Therefore, absolute value of FVC or %FVC itself has been reported to be not robust predictor of critical event. However, ratio of %FEV<sub>1</sub> to % FVC may be useful parameter in subgroup of CPFE patients. In terms of different cut-off value of this ratio, CPFE patients tend to have more mild restrictive impairment compared with that of IPF patients. Another interesting finding was that finger clubbing which is associated with poor survival in CPFE patients. Finger clubbing usually shows chronicity in ILD patients. However, it predicted clinical course in CPFE patients at our cohort. So, we insisist on the importance of initial careful evaluation of physical findings in CPFE.**

**Regarding prognosis, CPFE patients showed poor survival compared to that of IPF patients in our cohort. Therefore, even if lung volume is seemingly preserved, we should follow-up these patients carefully with multi-dimentionns.**

1  
2  
3  
4  
5  
6  
7  
8  
9  
10  
11  
12  
13  
14  
15  
16  
17  
18  
19  
20  
21  
22  
23  
24  
25  
26  
27  
28  
29  
30  
31  
32  
33  
34  
35  
36  
37  
38  
39  
40  
41  
42  
43  
44  
45  
46  
47  
48  
49  
50  
51  
52  
53  
54  
55  
56  
57  
58  
59  
60

This time, we did not evaluate the treatment in CPFE patients. Currently, there is no consensus on treatment of CPFE with PAH (32,33). This is a vital topic for future study.

There were several limitations in our study. First, this was a single center, uncontrolled design, retrospective study, which means that it is possible that important data was not collected. In addition, the results cannot be generalized to all CPFE patients. Second, we did not measure the exact areas of emphysema and fibrosis. Therefore, our cohort may have been at a different stage compared with previous CPFE patients. Third, most of our patients could not undergo surgical biopsy because of disability and reduced lung function. Thus, we could not evaluate the detailed pathology of our CPFE patients. Fourth, we did not evaluate serial pulmonary function. Recently, Du Bois et al. reported that percent predicted FVC and the 24 week change in FVC were useful predictors of mortality in IPF (34). Therefore, it might be helpful to measure serial FVC as a prognostic predictor in CPFE. Lastly, in keeping with previous reports, our study patients were all heavy smokers. Therefore, we could not distinguish CPFE from smoking-related NSIP (35). However, even considering these limitations, prediction of prognosis using minimally invasive methods in these patients may be quite useful.

In conclusion, our CPFE patients showed poor survival compared to that of IPF patients. CPFE patients often develop AE, for which serum KL-6 was a useful predictor. Finger clubbing and %FEV1 / % FVC more than 1.2 were independent prognostic predictors of mortality in patients with CPFE. A multicenter study of this new entity is warranted for further research.

#### ACKNOWLEDGEMENTS

We would like to thank all residents for their time and efforts with the collection of medical records at Okinawa Chubu Hospital.

## Data Sharing

There is no additional data available.

## Funding

No specific funding.

## References

- 1 Cottin V, Nuns H, Billet PY, Delaval P, Devouassoux G, Tillie-Leblond I, Israel-Biet D, Court-Fortune I, Valeyre D, Cordier JF; Group d'Etude et de Recherche sur les maladies Orphelines Pulmonaries ( GERM O P ). Combined pulmonary fibrosis and emphysema: a distinct underrecognised entity. *Eur Respir J* 2005; 26: 586–593.
2. Wiggins J, Strickland B, Turner-Warwick M. Combined cryptogenic fibrosing alveolitis and emphysema: the value of high resolution computed tomography in assessment. *Respir Med* 1990; 84: 365–369.
3. Mura M, Zompatori M, Pacilli AMG, Fasano L, Schiavina M, Fabbri M. The presence of emphysema further impairs physiologic function in patients with idiopathic pulmonary fibrosis. *Respir Care* 2006; 51: 257–265.
- 4.Strickland NH, Hughes JM, Hart DA, Myers MJ, Lavender JP. Cause of regional ventilation-perfusion mismatching in patients with idiopathic pulmonary fibrosis: a combined CT and scintigraphic study. *AJR Am J Roentgenol*,1993; 161: 719–725.
5. Doherty MJ, Pearson MG, O'Grady EA, Pellegrini V, Calverley PM. Cryptogenic fibrosing alveolitis with preserved lung volumes. *Thorax* 1997; 52: 998–1002.
6. Cottin, V.,Le PavecJ.,Prevot G,Mal H, Humbert M, Simonneau G, Cordier JF(GERM O P). Pulmonary hypertension in patients with combined pulmonary fibrosis and emphysema syndrome, *Eur.Respir J* 2010;35 (1):105–111.

- 1  
2  
3  
4  
5  
6  
7  
8  
9  
10  
11  
12  
13  
14  
15  
16  
17  
18  
19  
20  
21  
22  
23  
24  
25  
26  
27  
28  
29  
30  
31  
32  
33  
34  
35  
36  
37  
38  
39  
40  
41  
42  
43  
44  
45  
46  
47  
48  
49  
50  
51  
52  
53  
54  
55  
56  
57  
58  
59  
60
7. Lettieri CJ, Nathan SD, Barnett SD, Ahmad S, Shorr AF. Prevalence and outcomes of pulmonary arterial hypertension in advanced idiopathic □pulmonary fibrosis. *Chest* 2006; 129: 746–752.
  8. Hamada K, Nagai S, Tanaka S, Handa T, Shigematsu M, Nagao T, Mishima M, Kitaichi M, Izumi T. Significance of pulmonary □arterial pressure and diffusion capacity of the lung as prognos- ticator in patients with idiopathic pulmonary fibrosis. *Chest* 2007; 131: 650–656.
  9. Oswald-Mammosser M, Weitzenblum E, Quoix E, Moser G, Chaouat A, Charpentier C, Kessler R. Prognostic factors in COPD patients receiving long-term oxygen therapy. Importance of pulmonary artery pressure. *Chest* 1995; 107: 1193–1198.
  10. Usui K, Tanai C, Tanaka Y, Noda H, Ishihara T. The prevalence of pulmonary fibrosis combined with emphysema in patients with lung cancer. *Respirology* 2011; 16:326–331.
  11. Cottin V, Cordier JF. The syndrome of combined pulmonary □fibrosis and emphysema. *Chest* 2009; 136: 1–2.
  12. Mejia M, Carrillo G, Rojas-Serrano J, Estrada A, Suárez T, Alonso D, Barrientos E, Gaxiola M, Navarro C, Selman M. Idiopathic pulmonary fibrosis and emphysema: decreased survival associated with severe pulmonary arterial hypertension. *Chest* 2009; 136: 10–15.
  13. Thabut G, Dauriat G, Stern JB, Logeart D, Lévy A, Marrash-Chahla R, Mal H. Pulmonary hemodynamics in □advanced COPD candidates for lung volume reduction surgery or □lung transplantation. *Chest* 2005; 127: 1531–1536.
  14. Chaouat A, Naeije R, Weitzenblum E. Pulmonary hypertension in □COPD. *Eur Respir J* 2008; 32: 1371–1385.
  15. American Thoracic Society. American Thoracic Society/European Re- spiratory Society International Multidisciplinary Consensus Classifica- tion of the Idiopathic Interstitial Pneumonias. *Am J Respir Crit Care Med* 2002; 165: 277–304.
  16. Raghu G, Collard H, Egan J, Martinez FJ, Behr J, Brown KK, Colby TV, Cordier JF, Flaherty KR, Lasky JA, Lynch DA, Ryu JH, Swigris JJ, Wells AU, Ancochea J, Bouros D, Carvalho C, Costabel U, Ebina M, Hansell DM, Johkoh T, Kim DS, King TE Jr, Kondoh Y, Myers J, Müller NL, Nicholson AG, Richeldi L, Selman M, Dudden RF, Griss BS, Protzko SL, Schönemann HJ; ATS/ERS/JRS/ALAT

1  
2  
3  
4  
5  
6  
7  
8  
9  
10  
11  
12  
13  
14  
15  
16  
17  
18  
19  
20  
21  
22  
23  
24  
25  
26  
27  
28  
29  
30  
31  
32  
33  
34  
35  
36  
37  
38  
39  
40  
41  
42  
43  
44  
45  
46  
47  
48  
49  
50  
51  
52  
53  
54  
55  
56  
57  
58  
59  
60

Committee on Idiopathic Pulmonary Fibrosis. An Official ATS/ERS/JRS/ALAT Statement: Idiopathic Pulmonary Fibrosis: Evidence-based Guidelines for Diagnosis and Management . *Am J Respir Crit Care Med* 2011;183: 788–824.

17. Kitaguchi Y, Fujimoto K, Hanaoka M, Kawakami S, Honda T, Kubo K. Clinical characteristics of combined pulmonary fibrosis and emphysema. *Respirology* 2010;156:265–271.

18. Collard HR, Moore BB, Flaherty KR, Brown KK, Kaner RJ, King TE Jr, Lasky JA, Loyd JE, Noth I, Olman MA, Raghu G, Roman J, Ryu J, Zisman D. Idiopathic Pulmonary Fibrosis Clinical Research Network Investigators. Acute exacerbations of idiopathic pulmonary fibrosis. *Am J Respir Crit Care Med* 2007;176:636–643.

19. Lee CH, Kim HJ, Park CM, Lim KY, Lee JY, Kim DJ, Yeon JH, Hwang SS, Kim DK, Lee SM, Yim JJ, Yang SC, Yoo CG, Chung HS, Kim YW, Han SK, Shim YS. The impact of combined pulmonary fibrosis and emphysema on mortality *Int J Tuberc Lung Dis* 2011; 15(8):1111–1116.

20. Akagi T, Matsumoto T, Harada T, Tanaka M, Kuraki T, Fujita M, Watanabe K. Coexistent emphysema delays the decrease of vital capacity in idiopathic pulmonary fibrosis. *Respir Med*. 2009; 103(8):1209–1215.

21. Jankowich MD, Rounds S. Combined pulmonary fibrosis and emphysema alters physiology but has similar mortality to pulmonary fibrosis without emphysema. *Lung* 2010; 188(5): 365–373.

22. Peng M, Cai F, Tian XL, Liu T, Cai BQ, Gao JM. Combined pulmonary fibrosis and emphysema syndrome. *Zhonghua Jie He He Hu Xi Za Zhi* 2010; 33(7): 515–518.

23. Wells A, Desai S, Rubens M, Goh NS, Cramer D, Nicholson AG, Colby TV, du Bois RM, Hansell DM. Idiopathic Pulmonary Fibrosis: A Composite Physiologic Index Derived from Disease Extent Observed by Computed Tomography. *Am J Respir Crit Care Med* 2003; 167: 962–969.

24. Rogliani P, Mura M, Mattia P, Ferlosio A, Farinelli G, Mariotta S, Graziano P, Pezzuto G, Ricci A, Saltini C, Orlandi A. HRCT and histopathological evaluation of fibrosis and tissue destruction in IPF associated with pulmonary emphysema. *Respir Med* 2008;102(12):1753–1761.

25. Hozumi H, Nakamura Y, Johkoh T, Sumikawa H, Colby TV, Karayama M, Hayakawa H, Yokomura K, Imokawa S, Yasuda K, Toyoshima M, Suganuma H, Shirai T, Inui N, Suda T, Nakamura H, Chida K. Nonspecific Interstitial Pneumonia: Prognostic Significance of High-Resolution Computed Tomography in 59 Patients. *J Comput Assist Tomogr* 2011; 35: 583–589.



- 1  
2  
3  
4  
5  
6  
7  
8  
9  
10  
11  
12  
13  
14  
15  
16  
17  
18  
19  
20  
21  
22  
23  
24  
25  
26  
27  
28  
29  
30  
31  
32  
33  
34  
35  
36  
37  
38  
39  
40  
41  
42  
43  
44  
45  
46  
47  
48  
49  
50  
51  
52  
53  
54  
55  
56  
57  
58  
59  
60
26. Sumikawa H, Johkoh T, Colby T, Ichikado K, Suga M, Taniguchi H, Kondoh Y, Ogura T, Arakawa H, Fujimoto K, Inoue A, Mihara N, Honda O, Tomiyama N, Nakamura H, Müller NL. Computed Tomography Findings in Pathological Usual Interstitial Pneumonia—Relationship to Survival. *Am J Respir Crit Care Med* 2008;177:433–439.
27. Nathan SD, Shlobin OA, Barnett SD, Saggar R, Belperio JA, Ross DJ, Ahmad S, Saggar R, Libre E, Lynch JP 3rd, Zisman DA. Right ventricular systolic pressure by echocardiography as a predictor of pulmonary hypertension in idiopathic pulmonary fibrosis. *Respir Med* 2008; 102: 1305–1310.
28. Ley B, Collard H, King T. Clinical Course and Prediction of Survival in Idiopathic Pulmonary Fibrosis. *Am J Respir Crit Care Med* 2011;183:431–440.
29. Song JW, Hong SB, Lim CM, Koh Y, Kim DS. Acute exacerbation of idiopathic pulmonary fibrosis: incidence, risk factors and outcome. *Eur Respir J* 2011; 37: 356–363.
30. Kondoh Y, Taniguchi H, Katsuta T, et al. Risk factors of acute exacerbation of idiopathic pulmonary fibrosis. *Sarcoidosis Vasc Diffuse Lung Dis* 2010 July; 27(2):103–110.
31. Roland M, du Bois, Derek Weycker, Carlo Albera, et al. Forced Vital Capacity in Patients with Idiopathic Pulmonary Fibrosis. Test Properties and Minimal Clinically Important Difference. *Am J Respir Crit Care Med* 2011;184:1382-1389.
32. Cushley MJ, Davison AG, du Bois RM, et al. The diagnosis, assessment and treatment of diffuse parenchymal lung disease in adults. *Thorax* 1999; 54: S1–S30.
33. Portillo Carroz K, Roldan Sanchez J, Morera Prat J. Combined pulmonary fibrosis and emphysema. *Arch Bronchoneumol* 2010; 46(12):646–51.
34. du Bois R, Weycker D, Albera C, Bradford WZ, Costabel U, Kartashov A, Lancaster L, Noble PW, Raghu G, Sahn SA, Swarcberg J, Thomeer M, Valeyre D, King TE Jr. Ascertainment of Individual Risk of Mortality for Patients with Idiopathic Pulmonary Fibrosis. *Am J Respir Crit Care Med* 2011;184:459–466.
35. Marten K, Milne D, Antoniou K, Nicholson AG, Tennant RC, Hansel TT, Wells AU, Hansell DM. Non-specific interstitial pneumonia in cigarette smokers: a CT study. *Eur Radiol* 2009; 19: 1679–1685.



1  
2  
3  
4  
5  
6  
7  
8  
9  
10  
11  
12  
13  
14  
15  
16  
17  
18 **Figure Legends:**  
19

20  
21 **Figure 1; CPFE patients show poor survival compared with that of IPF**  
22 **patients**  
23

24  
25  
26 **Figure 2; CPFE patients with clubbing show poor survival compared with**  
27 **that of without clubbing**  
28

29  
30  
31 **Figure 3; Ratio of %FEV<sub>1</sub> and %FVC more than 1.2 show poor survival**  
32 **rather than that of less than 1.2 in CPFE patients**  
33

34  
35  
36 **Figure 4; Ratio of %FEV<sub>1</sub> and %FVC more than 1.5 show poor survival**  
37 **rather than that of less than 1.5 in IPF patients**  
38  
39  
40  
41  
42  
43  
44  
45  
46  
47  
48  
49  
50  
51  
52  
53  
54  
55  
56  
57  
58  
59  
60

**TABLE 1. Patient clinical characteristics**

|                                | <b>IPF</b><br>( n= 152 )             | <b>CPFE</b><br>( n= 93 )             | <b>p-value</b>     |
|--------------------------------|--------------------------------------|--------------------------------------|--------------------|
| <b>Age, year (mean)</b>        | <b>73.01 ± 3.80</b><br>(60-91)       | <b>73.83 ± 7.07</b><br>(57-90)       | <b>0.2361</b>      |
| <b>Male sex, %</b>             | <b>83</b>                            | <b>82</b>                            | <b>0.8155</b>      |
| <b>Pack-year</b>               | <b>49 ± 0.6(15-180)</b>              | <b>62 ± 3.1(3-160)</b>               | <b>&lt; 0.0001</b> |
| <b>mMRC scale</b>              | <b>2.6 ± 0.04 ( 1-4 )</b>            | <b>2.5 ± 0.09 ( 1-4 )</b>            | <b>0.1002</b>      |
| <b>Dyspnea duration months</b> | <b>17.04 ± 0.28</b><br>(0-56)        | <b>12.98 ± 1.30</b><br>(0-60)        | <b>0.0002</b>      |
| <b>Clubbing, %</b>             | <b>53</b>                            | <b>45</b>                            | <b>&lt; 0.0001</b> |
| <b>KL-6, IU/L</b>              | <b>1058 ± 12.44</b><br>( 212-3250 )  | <b>1089 ± 75.04</b><br>( 201-4480 )  | <b>0.5914</b>      |
| <b>Baseline FEV1,%</b>         | <b>78.63 ± 0.32</b><br>(41.4-109.3 ) | <b>70.95 ± 0.89</b><br>( 37.4-96.7 ) | <b>&lt; 0.0001</b> |

|                       |                                             |                                           |                    |
|-----------------------|---------------------------------------------|-------------------------------------------|--------------------|
| <b>Baseline FVC,%</b> | <b>57.41 ± 0.27</b><br><b>( 24.9-82.7 )</b> | <b>63.86 ± 0.96</b><br><b>(37.4-99.5)</b> | <b>&lt; 0.0001</b> |
|-----------------------|---------------------------------------------|-------------------------------------------|--------------------|

Data are presented as mean± SD and mean %predicted ± SD

Definitions of abbreviations: IPF = Idiopathic Pulmonary Fibrosis; NSIP = Non Specific Interstitial Pneumonia; MRC = Medical Research Council; FEV<sub>1</sub>= forced expired volume in one second; FVC = forced vital capacity.

Table 2. HRCT Imaging in CPFE patients

|                                   | <b>IPF<br/>pattern<br/>( n=68 )</b> | <b>NSIP<br/>Pattern<br/>( n= 25 )</b> | <b>All<br/>( n= 93 )</b> |
|-----------------------------------|-------------------------------------|---------------------------------------|--------------------------|
| <b>Emphysema<br/>pattern</b>      |                                     |                                       |                          |
| <b>Paraseptal,%</b>               | <b>57</b>                           | <b>48</b>                             | <b>55</b>                |
| <b>Centrilobular,%</b>            | <b>29</b>                           | <b>32</b>                             | <b>30</b>                |
| <b>Panlobular,%</b>               | <b>14</b>                           | <b>20</b>                             | <b>15</b>                |
| <b>Fibrosis pattern</b>           |                                     |                                       |                          |
| <b>Traction bronchiectasis, %</b> | <b>96</b>                           | <b>88</b>                             | <b>94</b>                |
| <b>Reticulation, %</b>            | <b>91</b>                           | <b>88</b>                             | <b>90</b>                |
| <b>Honeycombing, %</b>            | <b>100</b>                          | <b>0</b>                              | <b>73</b>                |
| <b>Ground glass opacity , %</b>   | <b>34</b>                           | <b>100</b>                            | <b>52</b>                |
| <b>Consolidation, %</b>           | <b>29</b>                           | <b>60</b>                             | <b>38</b>                |

1  
2  
3  
4  
5  
6  
7  
8 **Definitions of abbreviations: HRCT = High resolution computed**  
9 **tomography ; IPF = Idiopathic pulmonary fibrosis ; NSIP = Non specific**  
10 **interstitial pneumonia.**  
11  
12  
13  
14  
15  
16  
17  
18  
19  
20  
21

22 **Table 3. Results of univariate analysis showing predictors of mortality**  
23

|                                                    | <b>Hazards ratio</b> | <b>95% CI</b>          | <b>P-value</b> |
|----------------------------------------------------|----------------------|------------------------|----------------|
| <b>KL-6</b>                                        | <b>1.0003</b>        | <b>1.00003-1.00063</b> | <b>0.029</b>   |
| <b>Finger clubbing</b>                             | <b>2.3711</b>        | <b>1.2394-4.5362</b>   | <b>0.009</b>   |
| <b>PaO<sub>2</sub></b>                             | <b>0.9477</b>        | <b>0.9013-0.9965</b>   | <b>0.036</b>   |
| <b>%FEV<sub>1</sub>/%FVC</b><br><b>(&gt; 1.2 )</b> | <b>2.6326</b>        | <b>1.4855-4.6655</b>   | <b>0.001</b>   |

24  
25  
26  
27  
28  
29  
30  
31  
32  
33  
34  
35  
36  
37  
38  
39  
40  
41  
42  
43 **Definitions of abbreviations: CI = confidence interval ; MRC = Medical**  
44 **research council; FVC = forced vital capacity.**  
45  
46  
47  
48  
49  
50  
51  
52  
53  
54  
55  
56  
57  
58  
59  
60

**Table 4. Results of the Cox proportional hazards regression analysis**

|                                               | <b>Hazards ratio</b> | <b>95% CI</b>        | <b>P-value</b> |
|-----------------------------------------------|----------------------|----------------------|----------------|
| <b>Finger clubbing</b>                        | <b>2.2620</b>        | <b>1.1746-4.3560</b> | <b>0.015</b>   |
| <b>%FEV<sub>1</sub>/%FVC<br/>( &gt; 1.2 )</b> | <b>1.9259</b>        | <b>1.0057-3.6883</b> | <b>0.048</b>   |

**Definitions of abbreviations: CI = confidence interval ; FVC = forced vital capacity.**

1  
2  
3  
4  
5  
6  
7  
8  
9  
10  
11  
12  
13  
14  
15  
16  
17  
18  
19  
20  
21  
22  
23  
24  
25  
26  
27  
28  
29  
30  
31  
32  
33  
34  
35  
36  
37  
38  
39  
40  
41  
42  
43  
44  
45  
46  
47  
48  
49  
50  
51  
52  
53  
54  
55  
56  
57  
58  
59  
60

For peer review only

## ICMJE Form for Disclosure of Potential Conflicts of Interest

### Identifying Information

#### Section 1.

1. Given Name (First Name)    2. Surname (Last Name)    3. Effective Date

**Tomoo**                              **Kishaba**                              **December 1, 2011**

4. Are you the corresponding author?    Yes

5. Manuscript Title

### **Mortality predictors and characteristics of patients in combined pulmonary fibrosis and emphysema**

#### The Work Under Consideration for Publication

##### Section 2.

Did you or your institution at any time receive payment or services from a third party for any aspect of the submitted work (including but not limited to grants, data monitoring board, study design, manuscript preparation, statistical analysis, etc...)?

Complete each row by checking "No" or providing the requested information. If you have more than one relationship click the

"Add" button to add a row. Excess rows can be removed by clicking the "X" button.

#### The Work Under Consideration for Publication

1. Grant                      No

2. Consulting fee or honorarium              No

3. **Support for travel to meetings for the study or other purposes**              **No**

4. **Fees for participation in review activities such as data monitoring boards, statistical analysis, endpoint committees, and the like**              **No**

5. **Payment for writing or reviewing the manuscript**                              **No**

6. **Provision of writing assistance, medicines, equipment, or administrative support**                              **No**

Section 3. Relevant financial activities outside the submitted work.

Place a check in the appropriate boxes in the table to indicate whether you have financial relationships (regardless of amount of compensation) with entities as described in the instructions. Use one line for each entity; add as many lines as you need by clicking the "Add +" box. You should report relationships that were present during the 36 months prior to submission.

Complete each row by checking "No" or providing the requested information. If you have more than one relationship click the

"Add" button to add a row. Excess rows can be removed by clicking the "X" button.

Relevant financial activities outside the submitted work.

**Type of Relationship (in alphabetical order)**

- |                                           |           |
|-------------------------------------------|-----------|
| 1. Board membership                       | No        |
| 2. Consultancy                            | No        |
| 3. Employment                             | No        |
| 4. Expert testimony                       | No        |
| 5. Grants/grants pending                  | No        |
| <b>6. Payment for lectures including</b>  | <b>No</b> |
| <b>7. Payment for manuscript</b>          | <b>No</b> |
| preparation                               |           |
| <b>8. Patents (planned, pending or</b>    |           |
| <b>issued)</b>                            | No        |
| 9. Royalties                              | No        |
| <b>10. Payment for development of</b>     |           |
| <b>educational presentations</b>          | No        |
| <b>11. Stock/stock options</b>            | No        |
| <b>12. Travel/accommodations/</b>         |           |
| <b>meeting expenses unrelated to</b>      |           |
| <b>activities listed**</b>                | No        |
| <b>13. Other (err on the side of full</b> |           |
| <b>disclosure)</b>                        | No        |



1  
2  
3  
4  
5  
6 **Section 4** Other relationships

7 **Are there other relationships or activities that readers could perceive to have influenced, or that**  
8 **give the appearance of potentially influencing, what you wrote in the submitted work?**  
9

10 No other relationships/conditions/circumstances that present a potential conflict of interest  
11  
12  
13  
14  
15  
16  
17  
18  
19  
20  
21  
22  
23  
24  
25  
26  
27  
28  
29  
30  
31  
32  
33  
34  
35  
36  
37  
38  
39  
40  
41  
42  
43  
44  
45  
46  
47  
48  
49  
50  
51  
52  
53  
54  
55  
56  
57  
58  
59  
60

## ICMJE Form for Disclosure of Potential Conflicts of Interest

### Identifying Information

#### Section 1.

1. Given Name (First Name)    2. Surname (Last Name)    3. Effective Date

**Yosuke**                      **Shimaoka**                      **December 1, 2011**

4. Are you the corresponding author?    No

5. Manuscript Title

### **Mortality predictors and characteristics of patients in combined pulmonary fibrosis and emphysema**

#### The Work Under Consideration for Publication

##### Section 2.

Did you or your institution at any time receive payment or services from a third party for any aspect of the submitted work

(including but not limited to grants, data monitoring board, study design, manuscript preparation, statistical analysis, etc...)?

Complete each row by checking "No" or providing the requested information. If you have more than one relationship click the

"Add" button to add a row. Excess rows can be removed by clicking the "X" button.

#### The Work Under Consideration for Publication

1. Grant                      No

2. Consulting fee or honorarium                      No

3. **Support for travel to meetings for the study or other purposes**                      **No**

4. **Fees for participation in review activities such as data monitoring boards, statistical analysis, endpoint committees, and the like**                      **No**

5. **Payment for writing or reviewing the manuscript**                      **No**

6. **Provision of writing assistance, medicines, equipment, or administrative support**                      **No**

Section 3. Relevant financial activities outside the submitted work.

Place a check in the appropriate boxes in the table to indicate whether you have financial relationships (regardless of amount of compensation) with entities as described in the instructions. Use one line for each entity; add as many lines as you need by clicking the "Add +" box. You should report relationships that were present during the 36 months prior to submission.

Complete each row by checking "No" or providing the requested information. If you have more than one relationship click the

"Add" button to add a row. Excess rows can be removed by clicking the "X" button.

Relevant financial activities outside the submitted work.

**Type of Relationship (in alphabetical order)**

- |                                           |           |
|-------------------------------------------|-----------|
| 1. Board membership                       | No        |
| 2. Consultancy                            | No        |
| 3. Employment                             | No        |
| 4. Expert testimony                       | No        |
| 5. Grants/grants pending                  | No        |
| <b>6. Payment for lectures including</b>  | <b>No</b> |
| <b>7. Payment for manuscript</b>          | <b>No</b> |
| preparation                               |           |
| <b>8. Patents (planned, pending or</b>    |           |
| <b>issued)</b>                            | No        |
| 9. Royalties                              | No        |
| <b>10. Payment for development of</b>     |           |
| <b>educational presentations</b>          | No        |
| <b>11. Stock/stock options</b>            | No        |
| <b>12. Travel/accommodations/</b>         |           |
| <b>meeting expenses unrelated to</b>      |           |
| <b>activities listed**</b>                | No        |
| <b>13. Other (err on the side of full</b> |           |
| <b>disclosure)</b>                        | No        |

1  
2  
3  
4  
5  
6  
7  
8  
9  
10  
11  
12  
13  
14  
15  
16  
17  
18  
19  
20  
21  
22  
23  
24  
25  
26  
27  
28  
29  
30  
31  
32  
33  
34  
35  
36  
37  
38  
39  
40  
41  
42  
43  
44  
45  
46  
47  
48  
49  
50  
51  
52  
53  
54  
55  
56  
57  
58  
59  
60

**Section 4** Other relationships

**Are there other relationships or activities that readers could perceive to have influenced, or that give the appearance of potentially influencing, what you wrote in the submitted work?**

No other relationships/conditions/circumstances that present a potential conflict of interest

For peer review only

## ICMJE Form for Disclosure of Potential Conflicts of Interest

### Identifying Information

#### Section 1.

1. Given Name (First Name)    2. Surname (Last Name)    3. Effective Date  
**Hajime**                            **Fukuyama**                            **December 1, 2011**

4. Are you the corresponding author?    No

5. Manuscript Title

### **Mortality predictors and characteristics of patients in combined pulmonary fibrosis and emphysema**

#### The Work Under Consideration for Publication

#### Section 2.

Did you or your institution at any time receive payment or services from a third party for any aspect of the submitted work (including but not limited to grants, data monitoring board, study design, manuscript preparation, statistical analysis, etc...)?

Complete each row by checking "No" or providing the requested information. If you have more than one relationship click the

"Add" button to add a row. Excess rows can be removed by clicking the "X" button.

#### The Work Under Consideration for Publication

1. Grant                    No
2. Consulting fee or honorarium                    No
3. **Support for travel to meetings for the study or other purposes**                    **No**
4. **Fees for participation in review activities such as data monitoring boards, statistical analysis, endpoint committees, and the like**                    **No**
5. **Payment for writing or reviewing the manuscript**                    **No**
6. **Provision of writing assistance, medicines, equipment, or administrative support**                    **No**

Section 3. Relevant financial activities outside the submitted work.

Place a check in the appropriate boxes in the table to indicate whether you have financial relationships (regardless of amount of compensation) with entities as described in the instructions. Use one line for each entity; add as many lines as you need by clicking the "Add +" box. You should report relationships that were present during the 36 months prior to submission.

Complete each row by checking "No" or providing the requested information. If you have more than one relationship click the

"Add" button to add a row. Excess rows can be removed by clicking the "X" button.

Relevant financial activities outside the submitted work.

**Type of Relationship (in alphabetical order)**

- |                                           |           |
|-------------------------------------------|-----------|
| 1. Board membership                       | No        |
| 2. Consultancy                            | No        |
| 3. Employment                             | No        |
| 4. Expert testimony                       | No        |
| 5. Grants/grants pending                  | No        |
| <b>6. Payment for lectures including</b>  | <b>No</b> |
| <b>7. Payment for manuscript</b>          | <b>No</b> |
| preparation                               |           |
| <b>8. Patents (planned, pending or</b>    |           |
| <b>issued)</b>                            | No        |
| 9. Royalties                              | No        |
| <b>10. Payment for development of</b>     |           |
| <b>educational presentations</b>          | No        |
| <b>11. Stock/stock options</b>            | No        |
| <b>12. Travel/accommodations/</b>         |           |
| <b>meeting expenses unrelated to</b>      |           |
| <b>activities listed**</b>                | No        |
| <b>13. Other (err on the side of full</b> |           |
| <b>disclosure)</b>                        | No        |

1  
2  
3  
4  
5 **Section 4** Other relationships  
6

7 **Are there other relationships or activities that readers could perceive to have influenced, or that**  
8 **give the appearance of potentially influencing, what you wrote in the submitted work?**  
9

10 No other relationships/conditions/circumstances that present a potential conflict of interest  
11  
12  
13  
14  
15  
16  
17  
18  
19  
20  
21  
22  
23  
24  
25  
26  
27  
28  
29  
30  
31  
32  
33  
34  
35  
36  
37  
38  
39  
40  
41  
42  
43  
44  
45  
46  
47  
48  
49  
50  
51  
52  
53  
54  
55  
56  
57  
58  
59  
60

## ICMJE Form for Disclosure of Potential Conflicts of Interest

### Identifying Information

#### Section 1.

1. Given Name (First Name)    2. Surname (Last Name)    3. Effective Date  
**Kyoko                                  Yoshida                                  December 1, 2011**

4. Are you the corresponding author?    No

5. Manuscript Title

### **Mortality predictors and characteristics of patients in combined pulmonary fibrosis and emphysema**

#### The Work Under Consideration for Publication

##### Section 2.

Did you or your institution at any time receive payment or services from a third party for any aspect of the submitted work (including but not limited to grants, data monitoring board, study design, manuscript preparation, statistical analysis, etc...)?

Complete each row by checking "No" or providing the requested information. If you have more than one relationship click the

"Add" button to add a row. Excess rows can be removed by clicking the "X" button.

#### The Work Under Consideration for Publication

1. Grant                                  No
2. Consulting fee or honorarium                  No
3. **Support for travel to meetings for the study or other purposes**                  **No**
4. **Fees for participation in review activities such as data monitoring boards, statistical analysis, endpoint committees, and the like**                  **No**
5. **Payment for writing or reviewing the manuscript**                                  **No**
6. **Provision of writing assistance, medicines, equipment, or administrative support**                                  **No**



Section 3. Relevant financial activities outside the submitted work.

Place a check in the appropriate boxes in the table to indicate whether you have financial relationships (regardless of amount of compensation) with entities as described in the instructions. Use one line for each entity; add as many lines as you need by clicking the "Add +" box. You should report relationships that were present during the 36 months prior to submission.

Complete each row by checking "No" or providing the requested information. If you have more than one relationship click the

"Add" button to add a row. Excess rows can be removed by clicking the "X" button.

Relevant financial activities outside the submitted work.

**Type of Relationship (in alphabetical order)**

- |                                           |           |
|-------------------------------------------|-----------|
| 1. Board membership                       | No        |
| 2. Consultancy                            | No        |
| 3. Employment                             | No        |
| 4. Expert testimony                       | No        |
| 5. Grants/grants pending                  | No        |
| <b>6. Payment for lectures including</b>  | <b>No</b> |
| <b>7. Payment for manuscript</b>          | <b>No</b> |
| preparation                               |           |
| <b>8. Patents (planned, pending or</b>    |           |
| <b>issued)</b>                            | No        |
| 9. Royalties                              | No        |
| <b>10. Payment for development of</b>     |           |
| <b>educational presentations</b>          | No        |
| <b>11. Stock/stock options</b>            | No        |
| <b>12. Travel/accommodations/</b>         |           |
| <b>meeting expenses unrelated to</b>      |           |
| <b>activities listed**</b>                | No        |
| <b>13. Other (err on the side of full</b> |           |
| <b>disclosure)</b>                        | No        |

1  
2  
3  
4  
5  
6  
7  
8  
9  
10  
11  
12  
13  
14  
15  
16  
17  
18  
19  
20  
21  
22  
23  
24  
25  
26  
27  
28  
29  
30  
31  
32  
33  
34  
35  
36  
37  
38  
39  
40  
41  
42  
43  
44  
45  
46  
47  
48  
49  
50  
51  
52  
53  
54  
55  
56  
57  
58  
59  
60

**Section 4** Other relationships

**Are there other relationships or activities that readers could perceive to have influenced, or that give the appearance of potentially influencing, what you wrote in the submitted work?**

No other relationships/conditions/circumstances that present a potential conflict of interest

For peer review only

# ICMJE Form for Disclosure of Potential Conflicts of Interest

## Identifying Information

### Section 1.

1. Given Name (First Name)    2. Surname (Last Name)    3. Effective Date  
**Maki**                                **Noyama**                                **December 1, 2011**

4. Are you the corresponding author?    No

5. Manuscript Title

## **Mortality predictors and characteristics of patients in combined pulmonary fibrosis and emphysema**

### The Work Under Consideration for Publication

#### Section 2.

Did you or your institution at any time receive payment or services from a third party for any aspect of the submitted work (including but not limited to grants, data monitoring board, study design, manuscript preparation, statistical analysis, etc...)?

Complete each row by checking "No" or providing the requested information. If you have more than one relationship click the

"Add" button to add a row. Excess rows can be removed by clicking the "X" button.

### The Work Under Consideration for Publication

1. Grant                                No
2. Consulting fee or honorarium                                No
3. **Support for travel to meetings for the study or other purposes**                                **No**
4. **Fees for participation in review activities such as data monitoring boards, statistical analysis, endpoint committees, and the like**                                **No**
5. **Payment for writing or reviewing the manuscript**                                **No**
6. **Provision of writing assistance, medicines, equipment, or administrative support**                                **No**

Section 3. Relevant financial activities outside the submitted work.

Place a check in the appropriate boxes in the table to indicate whether you have financial relationships (regardless of amount of compensation) with entities as described in the instructions. Use one line for each entity; add as many lines as you need by clicking the "Add +" box. You should report relationships that were present during the 36 months prior to submission.

Complete each row by checking "No" or providing the requested information. If you have more than one relationship click the

"Add" button to add a row. Excess rows can be removed by clicking the "X" button.

Relevant financial activities outside the submitted work.

**Type of Relationship (in alphabetical order)**

- |                                           |           |
|-------------------------------------------|-----------|
| 1. Board membership                       | No        |
| 2. Consultancy                            | No        |
| 3. Employment                             | No        |
| 4. Expert testimony                       | No        |
| 5. Grants/grants pending                  | No        |
| <b>6. Payment for lectures including</b>  | <b>No</b> |
| <b>7. Payment for manuscript</b>          | <b>No</b> |
| preparation                               |           |
| <b>8. Patents (planned, pending or</b>    |           |
| <b>issued)</b>                            | No        |
| 9. Royalties                              | No        |
| <b>10. Payment for development of</b>     |           |
| <b>educational presentations</b>          | No        |
| <b>11. Stock/stock options</b>            | No        |
| <b>12. Travel/accommodations/</b>         |           |
| <b>meeting expenses unrelated to</b>      |           |
| <b>activities listed**</b>                | No        |
| <b>13. Other (err on the side of full</b> |           |
| <b>disclosure)</b>                        | No        |

1  
2  
3  
4  
5  
6 **Section 4** Other relationships

7 **Are there other relationships or activities that readers could perceive to have influenced, or that**  
8 **give the appearance of potentially influencing, what you wrote in the submitted work?**  
9

10 No other relationships/conditions/circumstances that present a potential conflict of interest  
11  
12  
13  
14  
15  
16  
17  
18  
19  
20  
21  
22  
23  
24  
25  
26  
27  
28  
29  
30  
31  
32  
33  
34  
35  
36  
37  
38  
39  
40  
41  
42  
43  
44  
45  
46  
47  
48  
49  
50  
51  
52  
53  
54  
55  
56  
57  
58  
59  
60

## ICMJE Form for Disclosure of Potential Conflicts of Interest

### Identifying Information

#### Section 1.

1. Given Name (First Name)    2. Surname (Last Name)    3. Effective Date  
**Shin**                                    **Yamashiro**                                    **December 1, 2011**

4. Are you the corresponding author?    No

5. Manuscript Title

### **Mortality predictors and characteristics of patients in combined pulmonary fibrosis and emphysema**

#### The Work Under Consideration for Publication

#### Section 2.

Did you or your institution at any time receive payment or services from a third party for any aspect of the submitted work (including but not limited to grants, data monitoring board, study design, manuscript preparation, statistical analysis, etc...)?

Complete each row by checking "No" or providing the requested information. If you have more than one relationship click the

"Add" button to add a row. Excess rows can be removed by clicking the "X" button.

#### The Work Under Consideration for Publication

1. Grant                    No
2. Consulting fee or honorarium                    No
3. **Support for travel to meetings for the study or other purposes**                    **No**
4. **Fees for participation in review activities such as data monitoring boards, statistical analysis, endpoint committees, and the like**                    **No**
5. **Payment for writing or reviewing the manuscript**                    **No**
6. **Provision of writing assistance, medicines, equipment, or administrative support**                    **No**

Section 3. Relevant financial activities outside the submitted work.

Place a check in the appropriate boxes in the table to indicate whether you have financial relationships (regardless of amount of compensation) with entities as described in the instructions. Use one line for each entity; add as many lines as you need by clicking the "Add +" box. You should report relationships that were present during the 36 months prior to submission.

Complete each row by checking "No" or providing the requested information. If you have more than one relationship click the

"Add" button to add a row. Excess rows can be removed by clicking the "X" button.

Relevant financial activities outside the submitted work.

**Type of Relationship (in alphabetical order)**

- |                                           |           |
|-------------------------------------------|-----------|
| 1. Board membership                       | No        |
| 2. Consultancy                            | No        |
| 3. Employment                             | No        |
| 4. Expert testimony                       | No        |
| 5. Grants/grants pending                  | No        |
| <b>6. Payment for lectures including</b>  | <b>No</b> |
| <b>7. Payment for manuscript</b>          | <b>No</b> |
| preparation                               |           |
| <b>8. Patents (planned, pending or</b>    |           |
| <b>issued)</b>                            | No        |
| 9. Royalties                              | No        |
| <b>10. Payment for development of</b>     |           |
| <b>educational presentations</b>          | No        |
| <b>11. Stock/stock options</b>            | No        |
| <b>12. Travel/accommodations/</b>         |           |
| <b>meeting expenses unrelated to</b>      |           |
| <b>activities listed**</b>                | No        |
| <b>13. Other (err on the side of full</b> |           |
| <b>disclosure)</b>                        | No        |

1  
2  
3  
4  
5  
6  
7  
8  
9  
10  
11  
12  
13  
14  
15  
16  
17  
18  
19  
20  
21  
22  
23  
24  
25  
26  
27  
28  
29  
30  
31  
32  
33  
34  
35  
36  
37  
38  
39  
40  
41  
42  
43  
44  
45  
46  
47  
48  
49  
50  
51  
52  
53  
54  
55  
56  
57  
58  
59  
60

**Section 4** Other relationships

**Are there other relationships or activities that readers could perceive to have influenced, or that give the appearance of potentially influencing, what you wrote in the submitted work?**

No other relationships/conditions/circumstances that present a potential conflict of interest

For peer review only



## ICMJE Form for Disclosure of Potential Conflicts of Interest

### Identifying Information

#### Section 1.

1. Given Name (First Name)    2. Surname (Last Name)    3. Effective Date  
**Hitoshi**                            **Tamaki**                            **December 1, 2011**

4. Are you the corresponding author?    No

5. Manuscript Title

### **Mortality predictors and characteristics of patients in combined pulmonary fibrosis and emphysema**

#### The Work Under Consideration for Publication

#### Section 2.

Did you or your institution at any time receive payment or services from a third party for any aspect of the submitted work (including but not limited to grants, data monitoring board, study design, manuscript preparation, statistical analysis, etc...)?

Complete each row by checking "No" or providing the requested information. If you have more than one relationship click the

"Add" button to add a row. Excess rows can be removed by clicking the "X" button.

#### The Work Under Consideration for Publication

1. Grant                    No
2. Consulting fee or honorarium                    No
3. **Support for travel to meetings for the study or other purposes**                    **No**
4. **Fees for participation in review activities such as data monitoring boards, statistical analysis, end point committees, and the like**                    **No**
5. **Payment for writing or reviewing the manuscript**                    **No**
6. **Provision of writing assistance, medicines, equipment, or administrative support**                    **No**

Section 3. Relevant financial activities outside the submitted work.

Place a check in the appropriate boxes in the table to indicate whether you have financial relationships (regardless of amount of compensation) with entities as described in the instructions. Use one line for each entity; add as many lines as you need by clicking the "Add +" box. You should report relationships that were present during the 36 months prior to submission.

Complete each row by checking "No" or providing the requested information. If you have more than one relationship click the

"Add" button to add a row. Excess rows can be removed by clicking the "X" button.

Relevant financial activities outside the submitted work.

**Type of Relationship (in alphabetical order)**

- |                                           |           |
|-------------------------------------------|-----------|
| 1. Board membership                       | No        |
| 2. Consultancy                            | No        |
| 3. Employment                             | No        |
| 4. Expert testimony                       | No        |
| 5. Grants/grants pending                  | No        |
| <b>6. Payment for lectures including</b>  | <b>No</b> |
| <b>7. Payment for manuscript</b>          | <b>No</b> |
| preparation                               |           |
| <b>8. Patents (planned, pending or</b>    |           |
| <b>issued)</b>                            | No        |
| 9. Royalties                              | No        |
| <b>10. Payment for development of</b>     |           |
| <b>educational presentations</b>          | No        |
| <b>11. Stock/stock options</b>            | No        |
| <b>12. Travel/accommodations/</b>         |           |
| <b>meeting expenses unrelated to</b>      |           |
| <b>activities listed**</b>                | No        |
| <b>13. Other (err on the side of full</b> |           |
| <b>disclosure)</b>                        | No        |

1  
2  
3  
4  
5  
6 **Section 4** Other relationships

7 **Are there other relationships or activities that readers could perceive to have influenced, or that**  
8 **give the appearance of potentially influencing, what you wrote in the submitted work?**  
9

10 No other relationships/conditions/circumstances that present a potential conflict of interest  
11  
12  
13  
14  
15  
16  
17  
18  
19  
20  
21  
22  
23  
24  
25  
26  
27  
28  
29  
30  
31  
32  
33  
34  
35  
36  
37  
38  
39  
40  
41  
42  
43  
44  
45  
46  
47  
48  
49  
50  
51  
52  
53  
54  
55  
56  
57  
58  
59  
60

1  
2  
3  
4  
5  
6  
7  
8  
9  
10  
11  
12  
13  
14  
15  
16  
17  
18  
19  
20  
21  
22  
23  
24  
25  
26  
27  
28  
29  
30  
31  
32  
33  
34  
35  
36  
37  
38  
39  
40  
41  
42  
43  
44  
45  
46  
47  
48  
49  
50  
51  
52  
53  
54  
55  
56  
57  
58  
59  
60

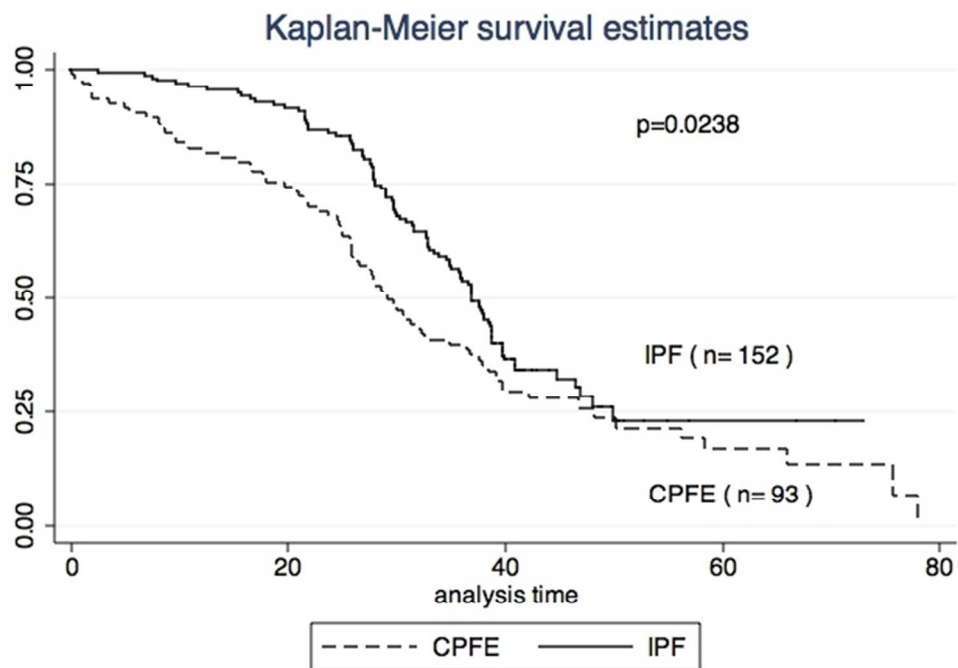

227x164mm (72 x 72 DPI)

View only

1  
2  
3  
4  
5  
6  
7  
8  
9  
10  
11  
12  
13  
14  
15  
16  
17  
18  
19  
20  
21  
22  
23  
24  
25  
26  
27  
28  
29  
30  
31  
32  
33  
34  
35  
36  
37  
38  
39  
40  
41  
42  
43  
44  
45  
46  
47  
48  
49  
50  
51  
52  
53  
54  
55  
56  
57  
58  
59  
60

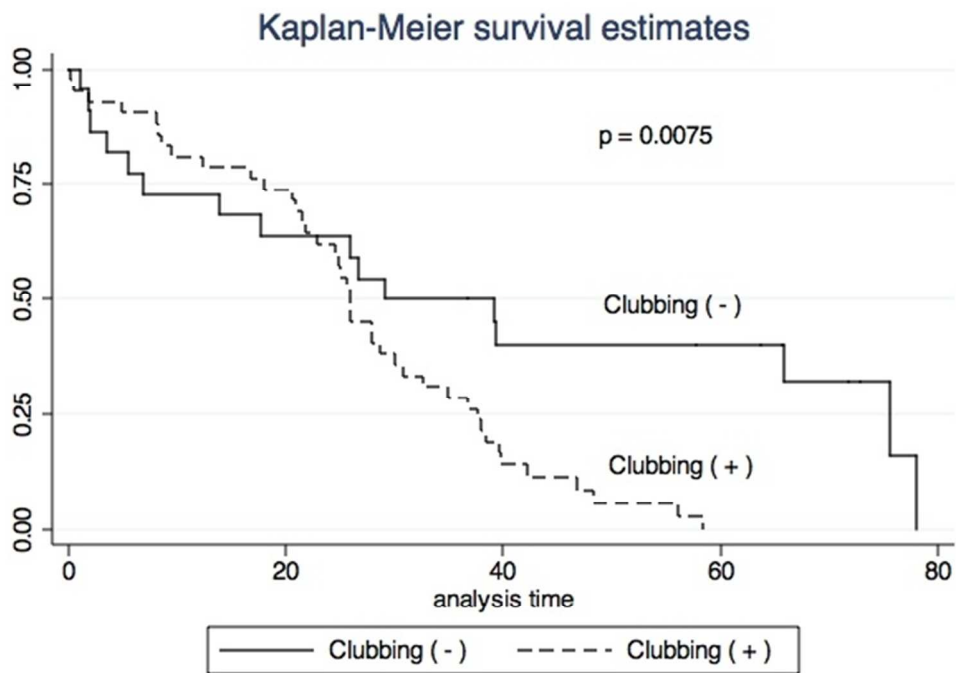

213x155mm (72 x 72 DPI)

view only

1  
2  
3  
4  
5  
6  
7  
8  
9  
10  
11  
12  
13  
14  
15  
16  
17  
18  
19  
20  
21  
22  
23  
24  
25  
26  
27  
28  
29  
30  
31  
32  
33  
34  
35  
36  
37  
38  
39  
40  
41  
42  
43  
44  
45  
46  
47  
48  
49  
50  
51  
52  
53  
54  
55  
56  
57  
58  
59  
60

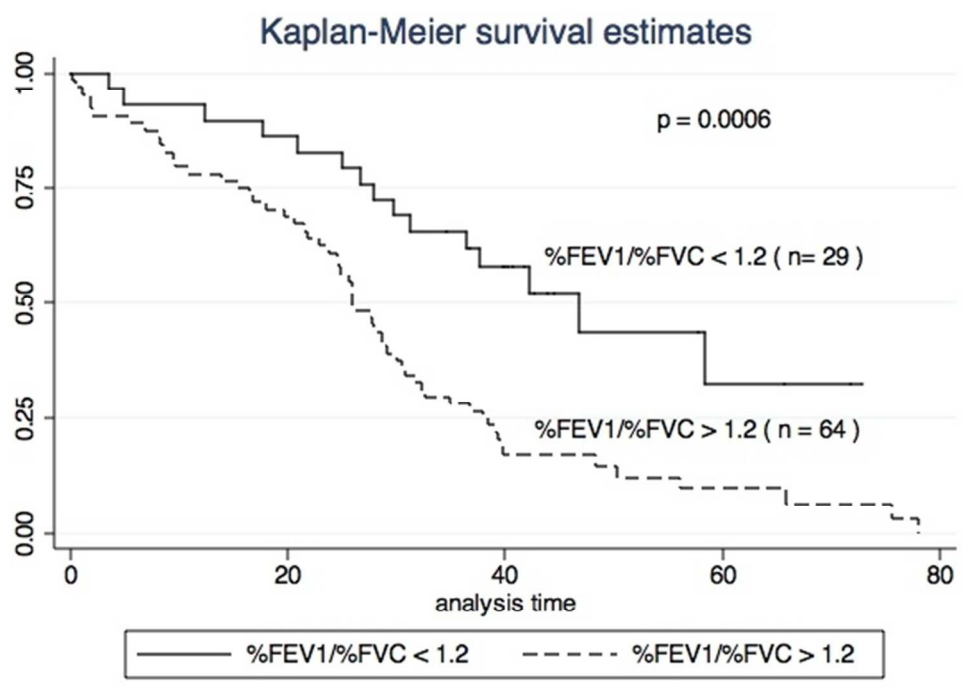

213x155mm (72 x 72 DPI)

view only

1  
2  
3  
4  
5  
6  
7  
8  
9  
10  
11  
12  
13  
14  
15  
16  
17  
18  
19  
20  
21  
22  
23  
24  
25  
26  
27  
28  
29  
30  
31  
32  
33  
34  
35  
36  
37  
38  
39  
40  
41  
42  
43  
44  
45  
46  
47  
48  
49  
50  
51  
52  
53  
54  
55  
56  
57  
58  
59  
60

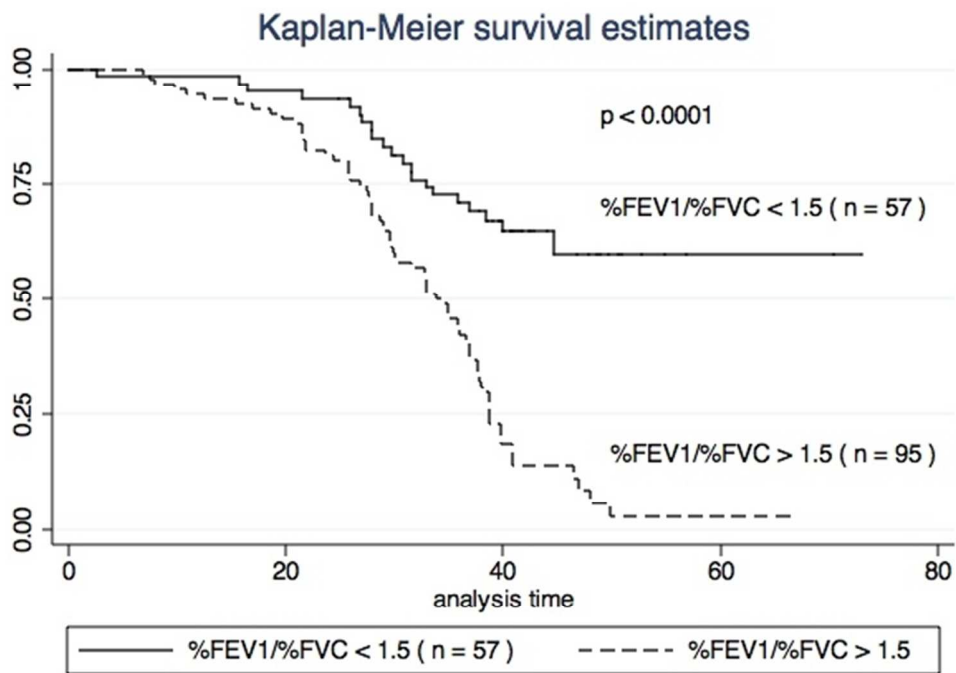

213x155mm (72 x 72 DPI)

view only

STROBE 2007 (v4) Statement—Checklist of items that should be included in reports of cohort studies

| Section/Topic             | Item # | Recommendation                                                                                                                                                                       | Reported on page # |
|---------------------------|--------|--------------------------------------------------------------------------------------------------------------------------------------------------------------------------------------|--------------------|
| Title and abstract        | 1      | (a) Indicate the study’s design with a commonly used term in the title or the abstract                                                                                               | 1                  |
|                           |        | (b) Provide in the abstract an informative and balanced summary of what was done and what was found                                                                                  | 2-3                |
| <b>Introduction</b>       |        |                                                                                                                                                                                      |                    |
| Background/rationale      | 2      | Explain the scientific background and rationale for the investigation being reported                                                                                                 | 2                  |
| Objectives                | 3      | State specific objectives, including any prespecified hypotheses                                                                                                                     | 2                  |
| <b>Methods</b>            |        |                                                                                                                                                                                      |                    |
| Study design              | 4      | Present key elements of study design early in the paper                                                                                                                              | 2                  |
| Setting                   | 5      | Describe the setting, locations, and relevant dates, including periods of recruitment, exposure, follow-up, and data collection                                                      | 2                  |
| Participants              | 6      | (a) Give the eligibility criteria, and the sources and methods of selection of participants. Describe methods of follow-up                                                           | 2                  |
|                           |        | (b) For matched studies, give matching criteria and number of exposed and unexposed                                                                                                  | 2                  |
| Variables                 | 7      | Clearly define all outcomes, exposures, predictors, potential confounders, and effect modifiers. Give diagnostic criteria, if applicable                                             | 3                  |
| Data sources/ measurement | 8*     | For each variable of interest, give sources of data and details of methods of assessment (measurement). Describe comparability of assessment methods if there is more than one group | 2-3                |
| Bias                      | 9      | Describe any efforts to address potential sources of bias                                                                                                                            | 2-3                |
| Study size                | 10     | Explain how the study size was arrived at                                                                                                                                            | 2                  |
| Quantitative variables    | 11     | Explain how quantitative variables were handled in the analyses. If applicable, describe which groupings were chosen and why                                                         | 2                  |
| Statistical methods       | 12     | (a) Describe all statistical methods, including those used to control for confounding                                                                                                | 5                  |
|                           |        | (b) Describe any methods used to examine subgroups and interactions                                                                                                                  | 5                  |
|                           |        | (c) Explain how missing data were addressed                                                                                                                                          | 5                  |
|                           |        | (d) If applicable, explain how loss to follow-up was addressed                                                                                                                       | 5                  |
|                           |        | (e) Describe any sensitivity analyses                                                                                                                                                | 5                  |
| <b>Results</b>            |        |                                                                                                                                                                                      |                    |



|                          |     |                                                                                                                                                                                                              |       |
|--------------------------|-----|--------------------------------------------------------------------------------------------------------------------------------------------------------------------------------------------------------------|-------|
| Participants             | 13* | (a) Report numbers of individuals at each stage of study—eg numbers potentially eligible, examined for eligibility, confirmed eligible, included in the study, completing follow-up, and analysed            | 2.3.6 |
|                          |     | (b) Give reasons for non-participation at each stage                                                                                                                                                         | 4     |
|                          |     | (c) Consider use of a flow diagram                                                                                                                                                                           |       |
| Descriptive data         | 14* | (a) Give characteristics of study participants (eg demographic, clinical, social) and information on exposures and potential confounders                                                                     | 6-7   |
|                          |     | (b) Indicate number of participants with missing data for each variable of interest                                                                                                                          |       |
|                          |     | (c) Summarise follow-up time (eg, average and total amount)                                                                                                                                                  | 6     |
| Outcome data             | 15* | Report numbers of outcome events or summary measures over time                                                                                                                                               | 6-7   |
| Main results             | 16  | (a) Give unadjusted estimates and, if applicable, confounder-adjusted estimates and their precision (eg, 95% confidence interval). Make clear which confounders were adjusted for and why they were included | 7     |
|                          |     | (b) Report category boundaries when continuous variables were categorized                                                                                                                                    | 6-7   |
|                          |     | (c) If relevant, consider translating estimates of relative risk into absolute risk for a meaningful time period                                                                                             |       |
| Other analyses           | 17  | Report other analyses done—eg analyses of subgroups and interactions, and sensitivity analyses                                                                                                               | 6-7   |
| <b>Discussion</b>        |     |                                                                                                                                                                                                              |       |
| Key results              | 18  | Summarise key results with reference to study objectives                                                                                                                                                     | 10    |
| <b>Limitations</b>       |     |                                                                                                                                                                                                              |       |
| Interpretation           | 20  | Give a cautious overall interpretation of results considering objectives, limitations, multiplicity of analyses, results from similar studies, and other relevant evidence                                   | 10-11 |
| Generalisability         | 21  | Discuss the generalisability (external validity) of the study results                                                                                                                                        | 10-11 |
| <b>Other information</b> |     |                                                                                                                                                                                                              |       |
| Funding                  | 22  | Give the source of funding and the role of the funders for the present study and, if applicable, for the original study on which the present article is based                                                |       |

\*Give information separately for cases and controls in case-control studies and, if applicable, for exposed and unexposed groups in cohort and cross-sectional studies.

**Note:** An Explanation and Elaboration article discusses each checklist item and gives methodological background and published examples of transparent reporting. The STROBE checklist is best used in conjunction with this article (freely available on the Web sites of PLoS Medicine at <http://www.plosmedicine.org/>, Annals of Internal Medicine at <http://www.annals.org/>, and Epidemiology at <http://www.epidem.com/>). Information on the STROBE Initiative is available at [www.strobe-statement.org](http://www.strobe-statement.org).



**A Cohort Study of mortality predictors and characteristics of patients with combined pulmonary fibrosis and emphysema**

|                                 |                                                                                                                                                                                                                                                                                                                                                                                                                                                     |
|---------------------------------|-----------------------------------------------------------------------------------------------------------------------------------------------------------------------------------------------------------------------------------------------------------------------------------------------------------------------------------------------------------------------------------------------------------------------------------------------------|
| Journal:                        | <i>BMJ Open</i>                                                                                                                                                                                                                                                                                                                                                                                                                                     |
| Manuscript ID:                  | bmjopen-2012-000988.R1                                                                                                                                                                                                                                                                                                                                                                                                                              |
| Article Type:                   | Research                                                                                                                                                                                                                                                                                                                                                                                                                                            |
| Date Submitted by the Author:   | 26-Mar-2012                                                                                                                                                                                                                                                                                                                                                                                                                                         |
| Complete List of Authors:       | Kishaba, Tomoo; Okinawa Chubu Hospital, Respiratory Medicine<br>Shimaoka, Yousuke; Okinawa Chubu Hospital, Respiratory medicine<br>Fukuyama, Hajime; Okinawa Chubu Hospital, Respiratory medicine<br>Yoshida, Kyoko; Nakamura Clinic, Home care<br>Tanaka, Maki; Kurashiki Central Hospital, Respiratory medicine<br>Yamashiro, Shin; Okinawa Chubu Hospital, Respiratory medicine<br>Tamaki, Hitoshi; Okinawa Chubu Hospital, Respiratory medicine |
| <b>Primary Subject Heading</b>: | Respiratory medicine                                                                                                                                                                                                                                                                                                                                                                                                                                |
| Secondary Subject Heading:      | Respiratory medicine                                                                                                                                                                                                                                                                                                                                                                                                                                |
| Keywords:                       | THORACIC MEDICINE, Interstitial lung disease < THORACIC MEDICINE,<br>Respiratory physiology < THORACIC MEDICINE                                                                                                                                                                                                                                                                                                                                     |
|                                 |                                                                                                                                                                                                                                                                                                                                                                                                                                                     |

SCHOLARONE™  
Manuscripts

Peer review only

**A Cohort Study of mortality predictors and characteristics of patients with combined pulmonary fibrosis and emphysema**

**Tomoo Kishaba<sup>1</sup>, Yousuke Shimaoka<sup>1</sup>, Hajime Fukuyama<sup>1</sup>, Kyoko Yoshida<sup>2</sup>, Maki Noyama<sup>3</sup>, Shin Yamashiro<sup>1</sup>, Hitoshi Tamaki<sup>1</sup>**

**<sup>1</sup>Department of Respiratory Medicine, Okinawa Chubu Hospital, Okinawa, Japan**

**<sup>2</sup> Department of home care, Nakamura Clinic**

**<sup>3</sup> Department of Respiratory Medicine, Kurashiki Central Hospital**

**Corresponding author and request for reprints:**

**Tomoo Kishaba**

**Department of Respiratory Medicine, Okinawa Chubu Hospital**

**Miyazato 281, Uruma City, Okinawa 904-2293, Japan**

**Telephone: +81 98 973 4111**

**Fax: +81 98 974 5165**

**E-mail: kishabatomoo@gmail.com**

**Total Word Count: 2477**

**Author Contributions:**

**T Kishaba, H Tamaki: Study concept and design, acquisition and interpretation of data, and drafting and finalization of the manuscript.**

**Y Shimaoka, H Fukuyama, K Yoshida, M Tanaka, S Yamashiro: Study design, and acquisition and interpretation of data.**

**Subject Heading: Mortality predictors in CPFE**

1  
2  
3  
4  
5  
6  
7  
8  
9  
10  
11  
12  
13  
14  
15  
16  
17  
18  
19  
20  
21  
22  
23  
24  
25  
26  
27  
28  
29  
30  
31  
32  
33  
34  
35  
36  
37  
38  
39  
40  
41  
42  
43  
44  
45  
46  
47  
48  
49  
50  
51  
52  
53  
54  
55  
56  
57  
58  
59  
60

**Article Focus:** Combined pulmonary fibrosis and emphysema (CPFE) has recently been recognized as a new entity. Prognosis is often poor, and pulmonary hypertension is common. There is little information on clinical parameters and predictors of mortality.

**What is the most useful clinical predictor of mortality in CPFE?**

**What is the most informative physiologic predictor of mortality in CPFE?**

**What is the most sensitive clinical predictor of acute exacerbation in CPFE?**

The aim of the study is to investigate predictor of mortality and acute exacerbation in CPFE using less invasive way.

**Key Messages:** Clinical point of view, finger clubbing is useful predictor of mortality in CPFE. In addition, ratio of percent predicted forced expiratory volume in 1 second (%FEV<sub>1</sub>) and percent predicted forced vital capacity (%FVC) more than 1.2% were independent predictors of mortality in patients with CPFE too. Prediction of prognosis of these patients by minimally invasive methods may be quite useful.

**Strengths and Limitations:** We evaluated clinical and physiological data using minimally invasive way. Therefore, most hospitals can refer our result easily. However, this is single center study. So, our result cannot be generalizable to other hospital's patients.

We will require multi-centre study for confirmation.

#### **Abstract**

**Objectives:** Our purpose was to assess the clinical data, predictors of mortality, acute exacerbation in CPFE patients.

**Design:** Single centre retrospective cohort study.

**Setting:** Teaching hospital in Japan.

**Participants:** Ninety-three patients had CPFE. We identified 93 CPFE patients with high-resolution computed tomographic (HRCT) through multidisciplinary discussion. Patients who had connective tissue disease (CTD), drug-associated ILD, and occupationally related ILD, such as asbestosis and silicosis were excluded.

**Interventions:** There were no interventions.

**Methods:** Medical records and HRCT scans from January 2002 through December 2007 were reviewed retrospectively at our hospital. Ninety-three

1  
2  
3  
4  
5  
6 patients had CPFE.

7 **Results:** The mean age of CPFE patients was 74 years. IPF and nonspecific  
8 interstitial pneumonia (NSIP) were observed as distinct HRCT patterns.

9  
10 **Fourty-two** patients showed finger clubbing. Mean serum Krebs von den  
11 Lungen-6 (KL-6) and percent predicted forced vital capacity (%FVC) were  
12 1089 IU/L, 63.86% respectively. Twenty-two patients developed acute  
13 exacerbation during observation period. Baseline KL-6 was a strong  
14 predictor of acute exacerbation. ( Odds Ratio = 1.0016, P = 0.009 ). Finger  
15 clubbing ( Hazards Ratio = 2.2620, P = 0.015 ) and percent predicted forced  
16 expiratory volume in 1 second (%FEV<sub>1</sub> ) / % FVC more than 1.2 ( Hazards  
17 Ratio = 1.9259, P = 0.048) were independent predictors of mortality in CPFE.  
18  
19

20  
21 **Conclusions:** Baseline serum KL-6 was a useful predictor of acute  
22 exacerbation (cutoff = 1050, ROC: 0.7720), which occurred in 24% (22/93) of  
23 the CPFE patients. Finger clubbing and %FEV<sub>1</sub> / %FVC more than 1.2 were  
24 independent predictors of mortality.  
25  
26

27  
28  
29 **Key words:** mortality; acute exacerbation; finger clubbing;  
30 KL-6 ; %FEV<sub>1</sub>/%FVC  
31

32 **There is no additional data available**

33  
34 **Key words:** mortality; acute exacerbation; finger clubbing;  
35 KL-6 ; %FEV<sub>1</sub>/%FVC  
36  
37

38  
39 **Total Abstract Count: 247**  
40  
41  
42  
43  
44  
45  
46  
47  
48  
49  
50  
51  
52  
53  
54  
55  
56  
57  
58  
59  
60

## Article summary

Article Focus: Combined pulmonary fibrosis and emphysema (CPFE) has recently been recognized as a new entity. Prognosis is often poor, and pulmonary hypertension is common. There is little information on clinical parameters and predictors of mortality.

What is the most useful clinical predictor of mortality in CPFE?

What is the most informative physiologic predictor of mortality in CPFE?

The aim of the study is to investigate predictor of mortality in CPFE with less invasive way.

Key Messages: Clinical point of view, finger clubbing is useful predictor of mortality in CPFE. In addition, ratio of percent predicted forced expiratory volume in 1 second (%FEV1 ) and percent forced vital capacity ( %FVC) more than 1.2% were independent predictors of mortality in patients with CPFE too. Prediction of prognosis of these patients by minimally invasive methods may be quite useful.

Strengths and Limitations: We investigated clinical and physiological data using minimally invasive way. Therefore, most hospitals can refer our result easily.

However, this is single center study. So, our result cannot be generalizable to other hospital's patients.

We will require multi-centre study for confirmation.

1  
2  
3  
4  
5  
6  
7  
8  
9  
10  
11  
12  
13  
14  
15  
16  
17  
18  
19  
20  
21  
22  
23  
24  
25  
26  
27  
28  
29  
30  
31  
32  
33  
34  
35  
36  
37  
38  
39  
40  
41  
42  
43  
44  
45  
46  
47  
48  
49  
50  
51  
52  
53  
54  
55  
56  
57  
58  
59  
60

Combined pulmonary fibrosis and emphysema (CPFE) has been recognized as a unique entity that is characterized by upper lobe emphysema and lower lobe fibrosis (1). Emphysema is sometimes associated with idiopathic pulmonary fibrosis (IPF)(2–3) and usually occurs with elevated lung volume. On the other hand, IPF is associated with a progressive decline in lung volume. In CPFE, lung volume is preserved in many patients, even in those at advanced stages, because supervening fibrosis offsets the effect of emphysema (3–5). CPFE patients also more often have pulmonary arterial hypertension (PAH) (6). PAH has been shown to be a significant prognostic indicator for both IPF (7,8) and chronic obstructive pulmonary disease (COPD) (9). In patients with lung cancer, CPFE is more prevalent than fibrosis (10). Recently, CPFE syndrome has been individualized, partly on the basis of distinct characteristics observed by high-resolution computed tomography (HRCT) of the chest (11).

There is very little information on predictors of mortality for CPFE (1,12). Patients with CPFE often have severe dyspnea and poor cardiopulmonary reserve (13,14), and many patients cannot tolerate invasive procedures such as video-assisted thoracic surgery (VATS).

Thus, the objective of the present study was to determine the predictors of acute exacerbation and mortality in CPFE patients using minimally invasive methods.

## Methods

### Study Population and HRCT Assessment

We retrospectively investigated our medical records and high-resolution computed tomographic (HRCT) scans from Okinawa Chubu Hospital, Okinawa, Japan from January 1, 2002 through December 31, 2007. During this period we had 319 interstitial lung disease(ILD) patients Eligible patients were men and women aged 18 years or older with a proven diagnosis of IPF or nonspecific interstitial pneumonia (NSIP) according to

1  
2  
3  
4  
5 the American Thoracic Society/ European Respiratory Society (ATS/ERS)  
6 statement (15). Among all ILD patients, we identified 93 CPFE patients  
7 through multidisciplinary discussion including our pulmonologists and  
8 radiologists. We excluded patients if; 1) they were without HRCT imaging,  
9 2) had connective tissue disease (CTD), 3) had drug-associated ILD, and 4)  
10 had occupationally related ILD, such as asbestosis and silicosis.

11  
12 Demographic and clinical data were obtained, including age, gender,  
13 smoking history, dyspnea duration, comorbidity, crackles, clubbing, Krebs  
14 von den Lungen-6 (KL-6) levels and Ultrasound  
15 Cardiography(UCG) findings. In terms of pulmonary arterial hypertension  
16 ( PAH ), we estimated with UCG .We also checked physiological data  
17 including forced expiratory volume in 1 second (FEV<sub>1</sub>), %FEV<sub>1</sub>, forced vital  
18 capacity (FVC), and %FVC. We only included pulmonary function data  
19 determined within six months of the date of HRCT.  
20  
21  
22  
23  
24  
25  
26  
27

28  
29 The HRCT scan imaging patterns were evaluated according to the  
30 ATS/ERS criteria (15). We diagnosed IPF patients using the new ATS/ERS  
31 and Japanese Respiratory Society /Latin America Thoracic Association  
32 criteria (16). Patients who met the following criteria, as described by Cottin  
33 et al. (1 ), were diagnosed as having CPFE: (1) the presence of emphysema  
34 on CT, defined as well-demarcated areas of decreased attenuation  
35 compared with contiguous normal lung, margined by a very thin (<1 mm)  
36 wall or no wall, and/or multiple bullae (>1 cm) with upper-zone  
37 predominance, and (2) the presence of significant pulmonary fibrosis on  
38 CT, defined as reticular opacities with peripheral and basal predominance,  
39 with or without traction bronchiectasis that occurs with or without  
40 honeycombing. Regarding acute exacerbation, we defined by the following  
41 criteria (18):(1) sudden deterioration of dyspnea within 30 days (2) new  
42 bilateral infiltration on chest radiograph (3)pulmonary infection or other  
43 known causes were excluded by bronchoalveolar lavage(BAL). Survival  
44 time was defined from the date of HRCT to death or last observation date.  
45 The Ethics Committee of Okinawa Chubu Hospital approved this study  
46 protocol.  
47  
48  
49  
50  
51  
52  
53  
54  
55  
56  
57  
58  
59  
60



## Statistical Methods

Clinical data are presented as means  $\pm$  SDs or medians (range), depending on distribution. Group comparisons were made using unpaired t-tests, the Wilcoxon rank sum test, Chi-squared statistics, and Fisher's exact test, as appropriate. Logistic regression analysis was performed to determine the relationship between clinical parameters and acute exacerbation. A Cox proportional hazards model analysis was performed to determine the relationships between clinical parameters, physiological indices, HRCT imaging patterns and survival. Clinical data analyses were performed using STATA software Version 11.0 (Stata Corp, College Station, TX, USA). Statistical significance was defined as a P value less than 0.05.

## Results

### Patient Characteristics, Acute Exacerbation ( AE ), and Clinical Parameters

The flow diagram in Figure 1 shows how the patients were identified. Ninety-three CPFE patients were (76 men , 17 women) were identified between 2002 and 2007. The mean age was 73 years, and 82 % of the patients were males. The mean time from symptoms to diagnosis was 12.68 months (0–96 months). The mean follow-up period was 30.7 months (0–74.6 months). All patients had histories of smoking ( mean: 62 pack-years ). The mean modified Medical Research Council (mMRC) breathlessness score was 2.5. Bibasilar fine crackles were auscultated in all patients and forty-two ( 45 % ) had finger clubbing. The baseline percent predicted forced expiratory volume in 1 second (FEV<sub>1</sub>) ( FEV<sub>1</sub>/average %FEV<sub>1</sub> for similar age, sex and body composition) was 70.95%, and the baseline percent predicted forced vital capacity (FVC) was 63.86%. During observation period, sixty-seven patients ( 72 % ) died. The clinical characteristics of both survivors and non-survivors are summarized in Table 1.

1  
2  
3  
4  
5  
6  
7  
8  
9  
10  
11  
12  
13  
14  
15  
16  
17  
18  
19  
20  
21  
22  
23  
24  
25  
26  
27  
28  
29  
30  
31  
32  
33  
34  
35  
36  
37  
38  
39  
40  
41  
42  
43  
44  
45  
46  
47  
48  
49  
50  
51  
52  
53  
54  
55  
56  
57  
58  
59  
60

The mean partial pressures of oxygen (PaO<sub>2</sub>) and carbon dioxide (PaCO<sub>2</sub>) were 63 mmHg and 43 mmHg, respectively. Thirty-two patients (34%) received home oxygen therapy and 36 ( 39% ) had pulmonary arterial hypertension. The mean systolic pulmonary arterial pressure was 62 mmHg. CPFE patients frequently have been reported to have lung cancer, especially squamous cell carcinoma (10,17). However, in our cohort, only twelve (13 %) patients developed lung cancer.

Among the 93 patients, twenty-two ( 24% ) developed AE, which met the ATS/ERS criteria (15). We performed univariate analysis to determine predictors of AE. Age, mMRC score, ctpattern, and baseline serum KL-6 were identified as possible predictors of AE. Logistic regression analysis was performed for these four factors, baseline serum KL-6 was found to be the strongest predictor of AE in the CPFE patients [Odds Ratio = 1.0016, P = 0.009] . ( Table 2 ) Using receiver operator characteristic curve (ROC) analysis, the useful KL-6 threshold was determined to be 1050 (ROC: 0.7720).

### HRCT Imaging and Predictors of Mortality

According to the ATS/ERS criteria (15,16 ), the patients were divided into those with UIP patterns and those with NSIP patterns. There were 68 patients in the IPF–pattern group and 25 patients in the NSIP–pattern group. The HRCT images also showed patterns indicating that 51 patients had para septal emphysema, 28 had centrilobular emphysema, and 14 had panlobular emphysema. Detailed results are presented in (Table 3).

The mean survival of CPFE patients was 30.7 months( 0.10–75.63 months). ( Figure 1 ). Patients with finger clubbing or increased ratio of %FEV<sub>1</sub> to %FVC showed poor survival in CPFE patients ( Figure 2) (Figure 3). Regarding ratio of %FEV<sub>1</sub> to %FVC, we chose 1.2 which was most useful threshold for predictor of mortality with using ROC analysis( ROC: 0.7671). Initially, we performed univariate analysis with a cutoff value of 0.1, which showed that baseline KL-6, finger clubbing, PaO<sub>2</sub>, and %FEV<sub>1</sub> / % FVC >

1  
2  
3  
4  
5  
6  
7  
8  
9  
10  
11  
12  
13  
14  
15  
16  
17  
18  
19  
20  
21  
22  
23  
24  
25  
26  
27  
28  
29  
30  
31  
32  
33  
34  
35  
36  
37  
38  
39  
40  
41  
42  
43  
44  
45  
46  
47  
48  
49  
50  
51  
52  
53  
54  
55  
56  
57  
58  
59  
60

1.2 were independent predictors of mortality. Cox proportional hazards regression analysis showed that finger clubbing ( HR = 2.2620, P = 0.015 ) and ratio of %FEV<sub>1</sub> to % FVC more than 1.2 ( HR = 1.9259, P = 0.048 ) were the strongest independent predictors of mortality in CPFE patients at our hospital (Table 4).

## Discussion

Previous studies have reported a high prevalence of PAH and lung cancer in CPFE patients (1,10). These comorbidities were associated with poor prognosis; the 1-year survival rate for CPFE patients with PAH was only 60% (6,11). Among these patients, high mean pulmonary arterial pressure, high pulmonary vascular resistance, high heart rate, and low diffusing capacity for carbon monoxide (DLco) were significantly associated with poor outcome. In one study, CPFE patients had a five fold higher mortality risk (adjusted HR: 5.10, 95%CI:1.75–14.9) in non-malignant situations (19). In the present study, only twelve of 93 patients had lung cancer in contrast to the number reported in a previous study (10). Our institution is a teaching and community hospital, and the patient population may be different from that of a university hospital.

The pulmonary function indices of the CPFE patients included in the present study were rather different from those in previous reports (1, 20). The CPFE patients in those studies had greater preserved lung volume despite reduced DLco, reduced transfer coefficient for carbon monoxide (Kco), and hypoxemia. Jankowich, et al. reported that CPFE altered physiology but had a mortality rate similar to that of IPF (21). In addition, Peng M, et al. reported similar physiology results for CPFE (22). In our study, the mean percent predicted FVC was 63.86% and that of FEV<sub>1</sub> was 70.95%, which showed more restrictive impairment compared with previous cases. This finding can be explained by the greater volume loss of the lower lung field due to severe fibrosis rather than by the offset effect of emphysema (23). This finding might also be because our cohort had

1  
2  
3  
4  
5  
6 less emphysema area compared with the previously reported cases.  
7 Another possibility is that the patients might have been in a different  
8 phase of CPFE. Recently, Rogliani, et al. reported the pathology of IPF and  
9 emphysema (24). They evaluated 17 biopsy-proven usual interstitial  
10 pneumonia (UIP) patients and found fibroblasts in areas of parenchymal  
11 destruction from emphysema/UIP-expressed matrix metalloproteinase  
12 (MMP)-2, MMP-9, MMP-7 and membrane type 1 (MT1)-MMP at  
13 significantly higher levels when compared with emphysema subjects. On  
14 the basis of this result, similar to the findings of the study by Rogliani et al.  
15 cited above, interstitial fibroblast activation could be stimulated to a  
16 greater degree in the areas of lung destruction in CPFE compared with  
17 emphysema alone, as in exaggerated tissue remodeling. Therefore, some  
18 of the CPFE patients may have had more intense fibrosis, which  
19 contributed to reduced FVC.  
20  
21  
22  
23  
24  
25  
26  
27

28  
29 In the analysis of the HRCT images, the patients were divided into two  
30 groups by UIP (usual interstitial pneumonia ) pattern and NSIP pattern  
31 according to the ATS/ERS criteria (15,16). All of the UIP-pattern patients  
32 had honeycombing, and the NSIP-pattern patients more often had  
33 consolidation ( 60% vs. 29% ) and ground-glass opacity ( 100% vs. 34% ).  
34 These findings were very similar to those from a recent report on HRCT for  
35 NSIP (25). In addition, Sumikawa et al. reported that traction  
36 bronchiectasis and fibrosis scores were associated with poor prognosis in  
37 pathological UIP patients (26). In the present study, HRCT pattern was not  
38 an independent prognostic predictor. CPFE patients usually have more  
39 severe PAH, low cardiac index (6) and are disabled (27), which we  
40 observed in our cohort. Thus, most CPFE patients cannot tolerate invasive  
41 procedures such as VATS. Therefore, we cannot compare biopsy-proven  
42 UIP with CPFE equally.  
43  
44  
45  
46  
47  
48  
49  
50  
51

52  
53 Acute exacerbation ( AE ) is a relentlessly progressive status and is  
54 associated with poor outcome (28). Thus, we evaluated AE of CPFE.  
55 During the observation period ( mean: 30.7 months ), twenty-two patients  
56  
57  
58  
59  
60

1  
2  
3  
4  
5 (24 %) developed AE. The annual incidence of AE is 9.4%. This finding is  
6 similar to that reported in IPF recently (29). Kondoh, et al. reported that  
7 high modified MRC score, high body mass index (BMI), and decline in FVC  
8 at six months were significant independent risk factors for AE-IPF (30).  
9 KL-6 levels in ILD patients reflect the overall extent of interstitial lesions.  
10 Among the many clinical parameters, baseline serum KL-6 was the most  
11 powerful predictor of AE in our CPFE patients. ROC analysis showed that  
12 the useful threshold was 1050 ( ROC = 0.7720 ).  
13  
14  
15  
16  
17  
18

19 Finally, we investigated the prognostic predictors of CPFE in our cohort.  
20 FVC has been reported robust powerful predictor of mortality in IPF  
21 patients (31). DLco often show variable value, so reproducibility is rather  
22 poor. In addition when FVC is reduced, DLco cannot be obtained with  
23 single breath method. Therefore, we chose %FEV<sub>1</sub> ,% FVC and ratio of  
24 these value as important indices out of pulmonary function parameters.  
25 Univariate analysis revealed that KL-6, finger clubbing, PaO<sub>2</sub>, and ratio  
26 of %FEV<sub>1</sub> to % FVC were independent predictors. Regression analysis  
27 using a Cox proportional hazards model showed that finger clubbing and  
28 ratio of %FEV<sub>1</sub> to % FVC more than 1.2 were the strongest independent  
29 predictors of mortality in CPFE at our hospital. In CPFE patients,lung  
30 volume is usually preserved. Therefore, absolute value of FVC or %FVC  
31 itself has been reported to be not robust predictor of critical event.  
32 However, ratio of %FEV<sub>1</sub> to % FVC may be useful parameter in subgroup of  
33 CPFE patients. In terms of different cut-off value of this ratio, CPFE  
34 patients tend to have more mild restrictive impairment compared with that  
35 of IPF patients. Another interesting finding was that finger clubbing which  
36 is associated with poor survival in CPFE patients. Finger clubbing usually  
37 shows chronicity in ILD patients. However, it predicted clinical course in  
38 CPFE patients at our cohort. So, we insisist on the importance of initial  
39 careful evaluation of physical findings in CPFE.  
40  
41  
42  
43  
44  
45  
46  
47  
48  
49  
50  
51  
52  
53

54 Regarding prognosis, CPFE patients showed poor survival similar to that  
55 of IPF patients in our cohort. Therefore, even if lung volume is seemingly  
56  
57  
58  
59  
60

1  
2  
3  
4  
5 preserved, we should follow-up these patients carefully with  
6 multi-dimensions.  
7  
8

9  
10 This time, we did not evaluate the treatment in CPFE patients. Currently,  
11 there is no consensus on treatment of CPFE with PAH (32,33). This is a  
12 vital topic for future study.  
13

14  
15 There were several limitations in our study. First, this was a single center,  
16 uncontrolled design, retrospective study, which means that it is possible  
17 that important data was not collected. In addition, the results cannot be  
18 generalized to all CPFE patients. Second, we did not measure the exact  
19 areas of emphysema and fibrosis. Therefore, our cohort may have been at  
20 a different stage compared with previous CPFE patients. Third, most of our  
21 patients could not undergo surgical biopsy because of disability and  
22 reduced lung function. Thus, we could not evaluate the detailed pathology  
23 of our CPFE patients. Fourth, we did not evaluate serial pulmonary  
24 function. Recently, Du Bois et al. reported that percent predicted FVC and  
25 the 24 week change in FVC were useful predictors of mortality in IPF (34).  
26 Therefore, it might be helpful to measure serial FVC as a prognostic  
27 predictor in CPFE. Lastly, in keeping with previous reports, our study  
28 patients were all heavy smokers. Therefore, we could not distinguish CPFE  
29 from smoking-related NSIP (35). However, even considering these  
30 limitations, prediction of prognosis using minimally invasive methods in  
31 these patients may be quite useful.  
32  
33  
34  
35  
36  
37  
38  
39  
40  
41  
42  
43

44 In conclusion, our CPFE patients showed poor survival compared to that  
45 of IPF patients. CPFE patients often develop AE, for which baseline serum  
46 KL-6 was a useful predictor. Finger clubbing and %FEV1 / % FVC more  
47 than 1.2 were independent prognostic predictors of mortality in patients  
48 with CPFE. A multicenter study of this new entity is warranted for further  
49 research.  
50  
51  
52  
53

#### 54 55 **ACKNOWLEDGEMENTS** 56 57 58 59 60

1  
2  
3  
4  
5  
6  
7  
8  
9  
10  
11  
12  
13  
14  
15  
16  
17  
18  
19  
20  
21  
22  
23  
24  
25  
26  
27  
28  
29  
30  
31  
32  
33  
34  
35  
36  
37  
38  
39  
40  
41  
42  
43  
44  
45  
46  
47  
48  
49  
50  
51  
52  
53  
54  
55  
56  
57  
58  
59  
60

We would like to thank all residents for their time and efforts with the collection of medical records at Okinawa Chubu Hospital. In addition, we thank Dr. Yasutani for interpretation for radiological findings.

## References

- 1 Cottin V, Nuns H, Billet PY, et al; Group d'Etude et de Recherche sur les maladies Orphelines Pulmonaries ( GERM O P ). Combined pulmonary fibrosis and emphysema: a distinct underrecognised entity. *Eur Respir J* 2005; 26: 586–593.
2. Wiggins J, Strickland B, Turner-Warwick M. Combined cryptogenic fibrosing alveolitis and emphysema: the value of high resolution computed tomography in assessment. *Respir Med* 1990; 84: 365–369.
3. Mura M, Zompatori M, Pacilli AMG, et al. The presence of emphysema further impairs physiologic function in patients with idiopathic pulmonary fibrosis. *Respir Care* 2006; 51: 257–265.
4. Strickland NH, Hughes JM, Hart DA, et al. Cause of regional ventilation-perfusion mismatching in patients with idiopathic pulmonary fibrosis: a combined CT and scintigraphic study. *AJR Am J Roentgenol*, 1993; 161: 719–725.
5. Doherty MJ, Pearson MG, O'Grady EA, et al. Cryptogenic fibrosing alveolitis with preserved lung volumes. *Thorax* 1997; 52: 998–1002.
6. Cottin, V., Le Pavec J., Prevot G, et al (GERM O P). Pulmonary hypertension in patients with combined pulmonary fibrosis and emphysema syndrome, *Eur. Respir J* 2010; 35 (1): 105–111.
7. Lettieri CJ, Nathan SD, Barnett SD, et al. Prevalence and outcomes of pulmonary arterial hypertension in advanced idiopathic pulmonary fibrosis. *Chest* 2006; 129: 746–752.
8. Hamada K, Nagai S, Tanaka S, et al. Significance of pulmonary arterial pressure and diffusion capacity of the lung as prognosticator in patients with idiopathic pulmonary fibrosis. *Chest* 2007; 131: 650–656.



- 1  
2  
3  
4  
5  
6  
7  
8  
9  
10  
11  
12  
13  
14  
15  
16  
17  
18  
19  
20  
21  
22  
23  
24  
25  
26  
27  
28  
29  
30  
31  
32  
33  
34  
35  
36  
37  
38  
39  
40  
41  
42  
43  
44  
45  
46  
47  
48  
49  
50  
51  
52  
53  
54  
55  
56  
57  
58  
59  
60
9. Oswald-Mammosser M, Weitzenblum E, Quoix E, et al. Prognostic factors in COPD patients receiving long-term oxygen therapy. Importance of pulmonary artery pressure. *Chest* 1995; 107: 1193–1198.
10. Usui K, Tanai C, Tanaka Y, et al. The prevalence of pulmonary fibrosis combined with emphysema in patients with lung cancer. *Respirology* 2011; 16:326–331.
11. Cottin V, Cordier JF. The syndrome of combined pulmonary fibrosis and emphysema. *Chest* 2009; 136: 1–2.
12. Mejia M, Carrillo G, Rojas-Serrano J, et al. Idiopathic pulmonary fibrosis and emphysema: decreased survival associated with severe pulmonary arterial hypertension. *Chest* 2009; 136: 10–15.
13. Thabut G, Dauriat G, Stern JB, et al. Pulmonary hemodynamics in advanced COPD candidates for lung volume reduction surgery or lung transplantation. *Chest* 2005; 127: 1531–1536.
14. Chaouat A, Naeije R, Weitzenblum E. Pulmonary hypertension in COPD. *Eur Respir J* 2008; 32: 1371–1385.
15. American Thoracic Society. American Thoracic Society/European Respiratory Society International Multidisciplinary Consensus Classification of the Idiopathic Interstitial Pneumonias. *Am J Respir Crit Care Med* 2002; 165: 277–304.
16. Raghu G, Collard H, Egan J, et al; ATS/ERS/JRS/ALAT Committee on Idiopathic Pulmonary Fibrosis. An Official ATS/ERS/JRS/ALAT Statement: Idiopathic Pulmonary Fibrosis: Evidence-based Guidelines for Diagnosis and Management. *Am J Respir Crit Care Med* 2011; 183: 788–824.
17. Kitaguchi Y, Fujimoto K, Hanaoka M, et al. Clinical characteristics of combined pulmonary fibrosis and emphysema. *Respirology* 2010; 156:265–271.
18. Collard HR, Moore BB, Flaherty KR, et al. Idiopathic Pulmonary Fibrosis Clinical Research Network Investigators. Acute exacerbations of idiopathic pulmonary fibrosis. *Am J Respir Crit Care Med* 2007; 176:636–643.



- 1  
2  
3  
4  
5  
6  
7  
8  
9  
10  
11  
12  
13  
14  
15  
16  
17  
18  
19  
20  
21  
22  
23  
24  
25  
26  
27  
28  
29  
30  
31  
32  
33  
34  
35  
36  
37  
38  
39  
40  
41  
42  
43  
44  
45  
46  
47  
48  
49  
50  
51  
52  
53  
54  
55  
56  
57  
58  
59  
60
19. Lee CH, Kim HJ, Park CM, et al. The impact of combined pulmonary fibrosis and emphysema on mortality *Int J Tuberc Lung Dis* 2011; 15(8):1111–1116.
20. Akagi T, Matsumoto T, Harada T, et al. Coexistent emphysema delays the decrease of vital capacity in idiopathic pulmonary fibrosis. *Respir Med*. 2009; 103(8):1209–1215.
21. Jankowich MD, Rounds S. Combined pulmonary fibrosis and emphysema alters physiology but has similar mortality to pulmonary fibrosis without emphysema. *Lung* 2010; 188(5): 365–373.
22. Peng M, Cai F, Tian XL, et al. Combined pulmonary fibrosis and emphysema syndrome. *Zhonghua Jie He He Hu Xi Za Zhi* 2010; 33(7): 515–518.
23. Wells A, Desai S, Rubens M, et al. Idiopathic Pulmonary Fibrosis: A Composite Physiologic Index Derived from Disease Extent Observed by Computed Tomography. *Am J Respir Crit Care Med* 2003; 167: 962–969.
24. Rogliani P, Mura M, Mattia P, et al. HRCT and histopathological evaluation of fibrosis and tissue destruction in IPF associated with pulmonary emphysema. *Respir Med* 2008;102(12):1753–1761.
25. Hozumi H, Nakamura Y, Johkoh T, et al. Nonspecific Interstitial Pneumonia: Prognostic Significance of High-Resolution Computed Tomography in 59 Patients. *J Comput Assist Tomogr* 2011; 35: 583–589.
26. Sumikawa H, Johkoh T, Colby T, et al. Computed Tomography Findings in Pathological Usual Interstitial Pneumonia Relationship to Survival. *Am J Respir Crit Care Med* 2008;177:433–439.
27. Nathan SD, Shlobin OA, Barnett SD, et al. Right ventricular systolic pressure by echocardiography as a predictor of pulmonary hypertension in idiopathic pulmonary fibrosis. *Respir Med* 2008; 102: 1305–1310.
28. Ley B, Collard H, King T. Clinical Course and Prediction of Survival in Idiopathic Pulmonary Fibrosis. *Am J Respir Crit Care Med* 2011;183:431–440.
29. Song JW, Hong SB, Lim CM, et al. Acute exacerbation of idiopathic pulmonary fibrosis: incidence, risk factors and outcome. *Eur Respir J* 2011; 37: 356–363.
30. Kondoh Y, Taniguchi H, Katsuta T, et al. Risk factors of acute exacerbation of idiopathic pulmonary fibrosis. *Sarcoidosis Vasc Diffuse Lung Dis* 2010 July; 27(2):103–110.

31. Roland M. du Bois, Derek Weycker, Carlo Albera, et al. Forced Vital Capacity in Patients with Idiopathic Pulmonary Fibrosis. Test Properties and Minimal Clinically Important Difference. *Am J Respir Crit Care Med* 2011;184:1382-1389.

32. Cushley MJ, Davison AG, du Bois RM, et al. The diagnosis, assessment and treatment of diffuse parenchymal lung disease in adults. *Thorax* 1999; 54: S1–S30.

33. Portillo Carroz K, Roldan Sanchez J, Morera Prat J. Combined pulmonary fibrosis and emphysema. *Arch Bronchoneumol* 2010; 46(12):646–51.

34. du Bois R, Weycker D, Albera C, et al. Ascertainment of Individual Risk of Mortality for Patients with Idiopathic Pulmonary Fibrosis. *Am J Respir Crit Care Med* 2011;184:459–466.

35. Marten K, Milne D, Antoniou K, et al. Non-specific interstitial pneumonia in cigarette smokers: a CT study. *Eur Radiol* 2009; 19: 1679–1685.

### Figure Legends:

Figure 1; Flow diagram in CPFE patients

Figure 2; Survival curve in CPFE patients

Figure 3; CPFE patients with clubbing show poor survival compared with that of without clubbing

Figure 4; Ratio of %FEV<sub>1</sub> and %FVC more than 1.2 show poor survival rather than that of less than 1.2 in CPFE patients

**TABLE 1. Patient clinical characteristics in CPFE**

|  | <b>Survivors</b> | <b>Non-survivors</b> |                |
|--|------------------|----------------------|----------------|
|  | <b>( n= 26 )</b> | <b>( n= 67 )</b>     | <b>p-value</b> |

|                                    |                                        |                                        |                    |
|------------------------------------|----------------------------------------|----------------------------------------|--------------------|
| <b>Age, year (mean)</b>            | <b>73.19 ± 1.18<br/>(57-84)</b>        | <b>73.83 ± 7.07<br/>(56-91)</b>        | <b>0.5815</b>      |
| <b>Male sex, %</b>                 | <b>85</b>                              | <b>81</b>                              | <b>0.6570</b>      |
| <b>Pack-year</b>                   | <b>60 ± 22.0 ( 5-110 )</b>             | <b>64 ± 31.4 ( 0-180 )</b>             | <b>0.5754</b>      |
| <b>mMRC scale</b>                  | <b>2.6 ± 0.88 ( 1-4 )</b>              | <b>2.5 ± 0.93 ( 1-4 )</b>              | <b>0.5091</b>      |
| <b>Dyspnea duration<br/>months</b> | <b>11.04 ± 5.73<br/>( 0-18 )</b>       | <b>13.07 ± 14.20<br/>( 0-96 )</b>      | <b>0.4821</b>      |
| <b>Clubbing, %</b>                 | <b>12</b>                              | <b>55</b>                              | <b>&lt; 0.0001</b> |
| <b>KL-6, IU/L</b>                  | <b>852 ± 278<br/>( 505-1200 )</b>      | <b>1174 ± 725<br/>( 201-4250 )</b>     | <b>0.0413</b>      |
| <b>Systolic PAP,<br/>mmHg</b>      | <b>28.53 ± 7.01</b>                    | <b>41.06 ± 11.57</b>                   | <b>&lt; 0.0001</b> |
| <b>Baseline FEV<sub>1</sub>,%</b>  | <b>71.14 ± 8.72<br/>( 59.6-103.9 )</b> | <b>70.88 ± 9.25<br/>( 31.4-106.3 )</b> | <b>0.9128</b>      |
| <b>Baseline FVC,%</b>              | <b>68.52 ± 9.09<br/>( 57-99.7 )</b>    | <b>61.89 ± 9.48<br/>( 24.9-82.3 )</b>  | <b>0.0058</b>      |
| <b>HOT , %</b>                     | <b>12</b>                              | <b>43</b>                              | <b>0.0035</b>      |
| <b>Paraseptal<br/>emphysema, %</b> | <b>19</b>                              | <b>69</b>                              | <b>&lt; 0.0001</b> |

|                                           |                                      |                                    |                    |
|-------------------------------------------|--------------------------------------|------------------------------------|--------------------|
| <b>Acute exacerbation, %</b>              | <b>0</b>                             | <b>31</b>                          | <b>0.0007</b>      |
| <b>%FEV<sub>1</sub> / %FVC &gt;1.2, %</b> | <b>19</b>                            | <b>79</b>                          | <b>&lt; 0.0001</b> |
| <b>Cancer, %</b>                          | <b>0</b>                             | <b>18</b>                          | <b>0.1068</b>      |
| <b>Cardiovascular, %</b>                  | <b>27</b>                            | <b>40</b>                          | <b>0.2339</b>      |
| <b>Ejection fraction. %</b>               | <b>58.2 ± 3.90</b>                   | <b>56.9 ± 5.19</b>                 | <b>0.2337</b>      |
| <b>Survival time , months</b>             | <b>50.16 ± 17.79<br/>( 26 – 96 )</b> | <b>25.68 ± 21.54<br/>(1 – 98 )</b> | <b>&lt; 0.0001</b> |

Data are presented as mean ± SD and mean %predicted ± SD

Definitions of abbreviations: IPF = Idiopathic Pulmonary Fibrosis; NSIP = Non Specific Interstitial Pneumonia; mMRC = modified Medical Research Council; FEV<sub>1</sub>= forced expired volume in one second; FVC = forced vital capacity.

Table 2. Predictor of acute exacerbation in CPFE patients

|                         | <b>Odds Ratio</b> | <b>95% CI</b>        | <b>p-value</b> |
|-------------------------|-------------------|----------------------|----------------|
| <b>Age</b>              | <b>0.9691</b>     | <b>0.8985-1.0453</b> | <b>0.417</b>   |
| <b>mMRC scale</b>       | <b>0.6681</b>     | <b>0.3538-1.2616</b> | <b>0.214</b>   |
| <b>Dyspnea duration</b> | <b>0.8967</b>     | <b>0.8169-0.9844</b> | <b>0.022</b>   |

|                      |               |                      |              |
|----------------------|---------------|----------------------|--------------|
| <b>Baseline KL-6</b> | <b>1.0016</b> | <b>1.0003-1.0027</b> | <b>0.009</b> |
| <b>CT pattern</b>    | <b>0.7612</b> | <b>0.2247-2.5779</b> | <b>0.661</b> |

**Definitions of abbreviations: CI= confidence interval, mMRC = modified Medical Research Council**

**Table 3. HRCT Imaging in CPFE patients**

|                                   | <b>UIP<br/>pattern<br/>( n=68 )</b> | <b>NSIP<br/>Pattern<br/>( n= 25 )</b> | <b>All<br/>( n= 93 )</b> |
|-----------------------------------|-------------------------------------|---------------------------------------|--------------------------|
| <b>Emphysema<br/>pattern</b>      |                                     |                                       |                          |
| <b>Paraseptal,%</b>               | <b>57</b>                           | <b>48</b>                             | <b>55</b>                |
| <b>Centrilobular,%</b>            | <b>29</b>                           | <b>32</b>                             | <b>30</b>                |
| <b>Panlobular,%</b>               | <b>14</b>                           | <b>20</b>                             | <b>15</b>                |
| <b>Fibrosis pattern</b>           |                                     |                                       |                          |
| <b>Traction bronchiectasis, %</b> | <b>96</b>                           | <b>88</b>                             | <b>94</b>                |
| <b>Reticulation, %</b>            | <b>91</b>                           | <b>88</b>                             | <b>90</b>                |
| <b>Honeycombing, %</b>            | <b>100</b>                          | <b>0</b>                              | <b>73</b>                |
| <b>Ground glass opacity , %</b>   | <b>34</b>                           | <b>100</b>                            | <b>52</b>                |
| <b>Consolidation, %</b>           | <b>29</b>                           | <b>60</b>                             | <b>38</b>                |

1  
2  
3  
4  
5  
6  
7  
8  
9  
10  
11  
12  
13  
14  
15  
16  
17  
18  
19  
20  
21  
22  
23  
24  
25  
26  
27  
28  
29  
30  
31  
32  
33  
34  
35  
36  
37  
38  
39  
40  
41  
42  
43  
44  
45  
46  
47  
48  
49  
50  
51  
52  
53  
54  
55  
56  
57  
58  
59  
60

**Definitions of abbreviations: HRCT = High resolution computed tomography ; IPF = Idiopathic pulmonary fibrosis ; NSIP = Non specific interstitial pneumonia.**

**Table 4. Results of the Cox proportional hazards regression analysis of mortality in CPFE patients**

|                                               | <b>Hazards ratio</b> | <b>95% CI</b>        | <b>P-value</b> |
|-----------------------------------------------|----------------------|----------------------|----------------|
| <b>Finger clubbing</b>                        | <b>2.2620</b>        | <b>1.1746-4.3560</b> | <b>0.015</b>   |
| <b>%FEV<sub>1</sub>/%FVC<br/>( &gt; 1.2 )</b> | <b>1.9259</b>        | <b>1.0057-3.6883</b> | <b>0.048</b>   |

**Definitions of abbreviations: CI = confidence interval ; FVC = forced vital capacity.**

For peer review only - <http://bmjopen.bmj.com/site/about/guidelines.xhtml>

1  
2  
3  
4  
5  
6  
7  
8  
9  
10  
11  
12  
13  
14  
15  
16  
17  
18  
19  
20  
21  
22  
23  
24  
25  
26  
27  
28  
29  
30  
31  
32  
33  
34  
35  
36  
37  
38  
39  
40  
41  
42  
43  
44  
45  
46  
47  
48  
49  
50  
51  
52  
53  
54  
55  
56  
57  
58  
59  
60

For peer review only

1  
2  
3  
4  
5  
6 **319 interstitial lung disease( ILD ) patients were identified**  
7 **from 2002 to 2007**  
8

9  
10  
11 **226 patients were excluded**

12  
13 → **due to ineligibility**

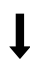

18  
19  
20  
21  
22  
23 **93 patients followed up**

24  
25  
26  
27  
28  
29  
30  
31  
32 ↙  
33  
34  
35 **UIP/CPFE**  
36 **( n = 68 )**

37  
38  
39  
40  
41  
42  
43  
44  
45  
46  
47  
48  
49  
50  
51  
52  
53  
54  
55  
56  
57  
58  
59  
60 ↘  
**NSIP/CPFE**  
**( n = 25 )**



1  
2  
3  
4  
5  
6  
7  
8  
9  
10  
11  
12  
13  
14  
15  
16  
17  
18  
19  
20  
21  
22  
23  
24  
25  
26  
27  
28  
29  
30  
31  
32  
33  
34  
35  
36  
37  
38  
39  
40  
41  
42  
43  
44  
45  
46  
47  
48  
49  
50  
51  
52  
53  
54  
55  
56  
57  
58  
59  
60

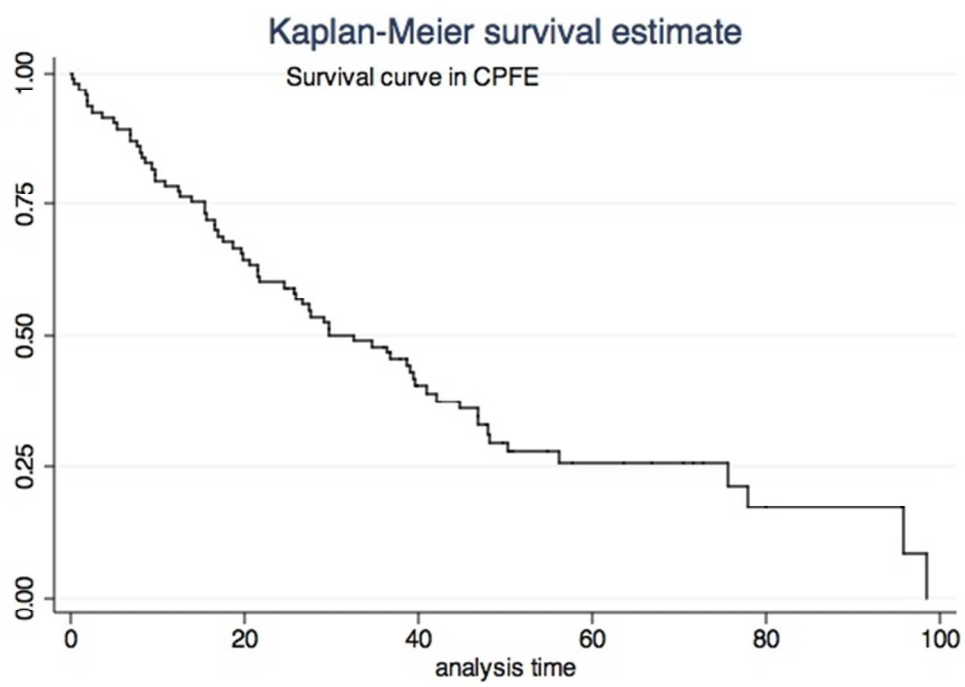

213x155mm (72 x 72 DPI)

view only

1  
2  
3  
4  
5  
6  
7  
8  
9  
10  
11  
12  
13  
14  
15  
16  
17  
18  
19  
20  
21  
22  
23  
24  
25  
26  
27  
28  
29  
30  
31  
32  
33  
34  
35  
36  
37  
38  
39  
40  
41  
42  
43  
44  
45  
46  
47  
48  
49  
50  
51  
52  
53  
54  
55  
56  
57  
58  
59  
60

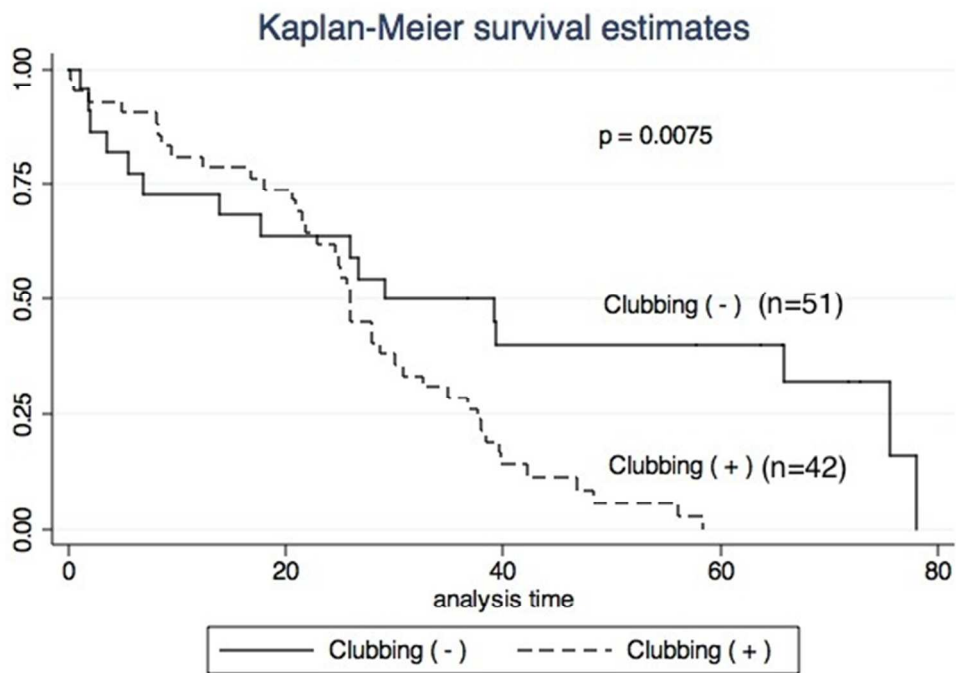

51x37mm (300 x 300 DPI)

view only

1  
2  
3  
4  
5  
6  
7  
8  
9  
10  
11  
12  
13  
14  
15  
16  
17  
18  
19  
20  
21  
22  
23  
24  
25  
26  
27  
28  
29  
30  
31  
32  
33  
34  
35  
36  
37  
38  
39  
40  
41  
42  
43  
44  
45  
46  
47  
48  
49  
50  
51  
52  
53  
54  
55  
56  
57  
58  
59  
60



213x155mm (72 x 72 DPI)

view only



**A Cohort Study of mortality predictors and characteristics of patients with combined pulmonary fibrosis and emphysema**

|                                    |                                                                                                                                                                                                                                                                                                                                                                                                                                                                      |
|------------------------------------|----------------------------------------------------------------------------------------------------------------------------------------------------------------------------------------------------------------------------------------------------------------------------------------------------------------------------------------------------------------------------------------------------------------------------------------------------------------------|
| Journal:                           | <i>BMJ Open</i>                                                                                                                                                                                                                                                                                                                                                                                                                                                      |
| Manuscript ID:                     | bmjopen-2012-000988.R2                                                                                                                                                                                                                                                                                                                                                                                                                                               |
| Article Type:                      | Research                                                                                                                                                                                                                                                                                                                                                                                                                                                             |
| Date Submitted by the Author:      | 04-Apr-2012                                                                                                                                                                                                                                                                                                                                                                                                                                                          |
| Complete List of Authors:          | Kishaba, Tomoo; Okinawa Chubu Hospital, Respiratory Medicine<br>Shimaoka, Yousuke; Okinawa Prefectural Miyako Hospital, Respiratory<br>medicine<br>Fukuyama, Hajime; Okinawa Chubu Hospital, Respiratory medicine<br>Yoshida, Kyoko; Nakamura Clinic, Home care<br>Tanaka, Maki; Kurashiki Central Hospital, Respiratory medicine<br>Yamashiro, Shin; Okinawa Chubu Hospital, Respiratory medicine<br>Tamaki, Hitoshi; Sunagawa Medical Clinic, Respiratory medicine |
| <b>Primary Subject<br>Heading</b>: | Respiratory medicine                                                                                                                                                                                                                                                                                                                                                                                                                                                 |
| Secondary Subject Heading:         |                                                                                                                                                                                                                                                                                                                                                                                                                                                                      |
| Keywords:                          | THORACIC MEDICINE, Interstitial lung disease < THORACIC MEDICINE,<br>Respiratory physiology < THORACIC MEDICINE                                                                                                                                                                                                                                                                                                                                                      |
|                                    |                                                                                                                                                                                                                                                                                                                                                                                                                                                                      |

SCHOLARONE™  
Manuscripts

**A Cohort Study of mortality predictors and characteristics of patients with combined pulmonary fibrosis and emphysema**

**Tomoo Kishaba<sup>1</sup>, Yousuke Shimaoka<sup>2</sup>, Hajime Fukuyama<sup>1</sup>,**

**Kyoko Yoshida<sup>3</sup>, Maki Noyama<sup>4</sup>, Shin Yamashiro<sup>1</sup>, Hitoshi Tamaki<sup>5</sup>**

**<sup>1</sup>Department of Respiratory Medicine, Okinawa Chubu Hospital, Okinawa, Japan**

**<sup>2</sup>Department of Respiratory Medicine, Okinawa Prefectural Miyako Hospital**

**<sup>3</sup> Department of home care, Nakamura Clinic**

**<sup>4</sup> Department of Respiratory Medicine, Kurashiki Central Hospital**

**<sup>5</sup>Department of Respiratory Medicine, Sunagawa Medical Clinic**

**Corresponding author and request for reprints:**

**Tomoo Kishaba**

**Department of Respiratory Medicine, Okinawa Chubu Hospital**

**Miyazato 281, Uruma City, Okinawa 904-2293, Japan**

**Telephone: +81 98 973 4111**

**Fax: +81 98 974 5165**

**E-mail: kishabatomoo@gmail.com**

**Total Word Count: 2448**

**Author Contributions:**

**T Kishaba, H Tamaki: Study concept and design, acquisition and**

1  
2  
3  
4  
5 interpretation of data, and drafting and finalization of the manuscript.

6  
7 Y Shimaoka, H Fukuyama, K Yoshida, M Tanaka, S Yamashiro: Study design,  
8 and acquisition and interpretation of data.

9  
10 **Subject Heading: Mortality predictors in CPFE**

11  
12  
13 **Article Focus:** Combined pulmonary fibrosis and emphysema (CPFE) has  
14 recently been recognized as a new entity. Prognosis is often poor, and  
15 pulmonary hypertension is common. There is little information on clinical  
16 parameters and predictors of mortality.

17  
18 **What is the most useful clinical predictor of mortality in CPFE?**

19  
20 **What is the most informative physiologic predictor of mortality in CPFE?**

21  
22 **What is the most sensitive clinical predictor of acute exacerbation in CPFE?**

23  
24 **The study aim was to investigate non-invasive predictors of mortality in**  
25 **CPFE.**

26  
27 **Key Messages:** From a clinical point of view, finger clubbing is useful  
28 predictor of mortality in CPFE. In addition, ratio of percent predicted forced  
29 expiratory volume in 1 second (%FEV<sub>1</sub>) and percent predicted forced vital  
30 capacity (%FVC) more than 1.2% were independent predictors of mortality in  
31 patients with CPFE too. Prediction of prognosis of these patients by minimally  
32 invasive methods may be quite useful.

33  
34 **Strengths and Limitations:** This study's strength was the definition of  
35 noninvasive, easily obtainable clinical and physiological measures of  
36 prognosis in CPFE. The major limitation of the study is the single-center  
37 retrospective design.

#### 38 39 **Abstract**

40  
41 **Objectives:** Our purpose was to assess the clinical data, predictors of  
42 mortality, acute exacerbation in CPFE patients.

43  
44 **Design:** Single centre retrospective cohort study.

45  
46 **Setting:** Teaching hospital in Japan.

47  
48 **Participants:** We identified 93 CPFE patients with high-resolution computed  
49 tomographic (HRCT) through multidisciplinary discussion. Patients who had  
50 connective tissue disease (CTD), drug-associated ILD, and occupationally  
51 related ILD, such as asbestosis and silicosis were excluded.

1  
2  
3  
4  
5  
6 **Interventions:** There were no interventions.

7 **Methods:** Medical records and HRCT scans from January 2002 through  
8  
9 December 2007 were reviewed retrospectively at our hospital. Ninety-three  
10 patients had CPFE.

11 **Results:** The mean age of CPFE patients was 74 years. IPF and nonspecific  
12 interstitial pneumonia (NSIP) were observed as distinct HRCT patterns.

13  
14 Forty two patients showed finger clubbing. Mean serum Krebs von den  
15 Lungen-6 (KL-6) and percent predicted forced vital capacity (%FVC) were  
16 1089 IU/L, 63.86% respectively. Twenty-two patients developed acute  
17 exacerbation during observation period. Baseline KL-6 was a strong  
18 predictor of acute exacerbation. ( Odds Ratio = 1.0016, P = 0.009 ). Finger  
19 clubbing ( Hazards Ratio = 2.2620, P = 0.015 ) and percent predicted forced  
20 expiratory volume in 1 second (%FEV<sub>1</sub>) / % FVC more than 1.2 ( Hazards  
21 Ratio = 1.9259, P = 0.048) were independent predictors of mortality in CPFE.

22  
23 **Conclusions:** Baseline serum KL-6 was a useful predictor of acute  
24 exacerbation (cutoff = 1050, ROC: 0.7720), which occurred in 24% (22/93) of  
25 the CPFE patients. Finger clubbing and %FEV<sub>1</sub> / %FVC more than 1.2 were  
26 independent predictors of mortality.  
27

28 **Key words:** mortality; acute exacerbation; finger clubbing;

29  
30 KL-6 ; %FEV<sub>1</sub>/%FVC

31  
32 There is no additional data available

33  
34 **Key words:** mortality; acute exacerbation; finger clubbing;

35  
36 KL-6 ; %FEV<sub>1</sub>/%FVC  
37

38  
39  
40  
41  
42  
43 **Total Abstract Count:** 243

44  
45  
46 **Combined pulmonary fibrosis and emphysema (CPFE)** has been  
47 recognized as a unique entity that is characterized by upper lobe  
48 emphysema and lower lobe fibrosis (1). Emphysema is sometimes  
49 associated with idiopathic pulmonary fibrosis (IPF) and usually occurs  
50 with elevated lung volume." should be "Emphysema is sometimes  
51 recognized in the setting of idiopathic pulmonary fibrosis (IPF), (2-3) and  
52 patients with both emphysema and fibrosis (CPFE) usually have elevated  
53  
54  
55  
56  
57  
58  
59  
60

1  
2  
3  
4  
5 lung volumes compared to patients with IPF alone. In CPFE, lung volume is  
6 preserved in many patients, even in those at advanced stages, because  
7 supervening fibrosis offsets the effect of emphysema (3–5). CPFE patients  
8 also more often have pulmonary arterial hypertension (PAH) (6). PAH has  
9 been shown to be a significant prognostic indicator for both IPF (7,8) and  
10 chronic obstructive pulmonary disease (COPD) (9). In patients with lung  
11 cancer , CPFE is more prevalent than fibrosis (10). Recently, CPFE  
12 syndrome has been individualized, partly on the basis of distinct  
13 characteristics observed by high-resolution computed tomography  
14 (HRCT) of the chest (11).

15  
16  
17  
18  
19  
20  
21  
22  
23  
24  
25  
26  
27  
28  
29  
30  
31  
32  
33  
34  
35  
36  
37  
38  
39  
40  
41  
42  
43  
44  
45  
46  
47  
48  
49  
50  
51  
52  
53  
54  
55  
56  
57  
58  
59  
60  
There is very little information on predictors of mortality for CPFE (1,12).  
Patients with CPFE often have severe dyspnea and poor cardiopulmonary  
reserve (13,14), and many patients cannot tolerate invasive procedures  
such as video-assisted thoracic surgery (VATS).

Thus, the objective of the present study was to determine the predictors of  
acute exacerbation and mortality in CPFE patients using noninvasive  
methods.

## Methods

### Study Population and HRCT Assessment

We retrospectively investigated our medical records and high-resolution  
computed tomographic (HRCT) scans from Okinawa Chubu Hospital,  
Okinawa, Japan from January 1, 2002 through December 31, 2007. During  
this period we had 319 interstitial lung disease(ILD) patients Eligible  
patients were men and women aged 18 years or older with a proven  
diagnosis of IPF or nonspecific interstitial pneumonia (NSIP) according to  
the American Thoracic Society/ European Respiratory Society (ATS/ERS)  
statement (15). Among all ILD patients, we identified 93 CPFE patients  
through multidisciplinary discussion including our pulmonologists and  
radiologists. We excluded patients if; 1) they were without HRCT imaging,  
2) had connective tissue disease (CTD), 3) had drug-associated ILD, and 4)



1  
2  
3  
4  
5 had occupationally related ILD, such as asbestosis and silicosis.  
6  
7 Demographic and clinical data were obtained, including age, gender,  
8 smoking history, dyspnea duration, comorbidity, crackles, clubbing, Krebs  
9 von den Lungen-6 (KL-6) levels and Ultrasound  
10  
11 Cardiography(UCG)findings. In terms of pulmonary arterial hypertension  
12 ( PAH ), we estimated with UCG .We also checked physiological data  
13 including forced expiratory volume in 1 second (FEV<sub>1</sub>), %FEV<sub>1</sub>, forced vital  
14 capacity (FVC), and %FVC. We only included pulmonary function data  
15 determined within six months of the date of HRCT.  
16  
17  
18  
19

20  
21 The HRCT scan imaging patterns were evaluated according to the  
22 ATS/ERS criteria (15). We diagnosed IPF patients using the new ATS/ERS  
23 and Japanese Respiratory Society /Latin America Thoracic Association  
24 criteria (16). Patients who met the following criteria, as described by Cottin  
25 et al. (1 ), were diagnosed as having CPFE: (1) the presence of emphysema  
26 on CT, defined as well-demarcated areas of decreased attenuation  
27 compared with contiguous normal lung, margined by a very thin (<1 mm)  
28 wall or no wall, and/or multiple bullae (>1 cm) with upper-zone  
29 predominance, and (2) the presence of significant pulmonary fibrosis on  
30 CT, defined as reticular opacities with peripheral and basal predominance,  
31 with or without traction bronchiectasis that occurs with or without  
32 honeycombing. Regarding acute exacerbation, we defined by the following  
33 criteria (18):(1) sudden deterioration of dyspnea within 30 days (2) new  
34 bilateral infiltration on chest radiograph (3)pulmonary infection or other  
35 known causes were excluded by bronchoalveolar lavage(BAL). Survival  
36 time was defined from the date of HRCT to death or last observation date.  
37  
38 The Ethics Committee of Okinawa Chubu Hospital approved this study  
39 protocol.  
40  
41  
42  
43  
44  
45  
46  
47  
48  
49

## 50 51 Statistical Methods

52  
53 Clinical data are presented as means  $\pm$  SDs or medians (range), depending  
54 on distribution. Group comparisons were made using unpaired t-tests, the  
55 Wilcoxon rank sum test, Chi-squared statistics, and Fisher's exact test, as  
56  
57  
58  
59  
60

1  
2  
3  
4  
5 appropriate. Logistic regression analysis was performed to determine the  
6 relationship between clinical parameters and acute exacerbation. A Cox  
7 proportional hazards model analysis was performed to determine the  
8 relationships between clinical parameters, physiological indices, HRCT  
9 imaging patterns and survival. Clinical data analyses were performed  
10 using STATA software Version 11.0 (Stata Corp, College Station, TX, USA).  
11 Statistical significance was defined as a P value less than 0.05.  
12  
13  
14  
15  
16

## 17 Results

### 18 Patient Characteristics, Acute Exacerbation ( AE ), and Clinical Parameters

19  
20 The flow diagram in Figure 1 shows how the patients were identified.  
21 Ninety-three CPFE patients (76 men , 17 women) were identified between  
22 2002 and 2007. The mean age was 73 years, and 82 % of the patients were  
23 males. The mean time from symptoms to diagnosis was 12.68 months (0–  
24 96 months). The mean follow-up period was 30.7 months (0–74.6 months).  
25 All patients had histories of smoking ( mean: 62 pack-years ). The mean  
26 modified Medical Research Council (mMRC) breathlessness score was 2.5.  
27 Bibasilar fine crackles were auscultated in all patients and forty-two  
28 ( 45 % ) had finger clubbing. The baseline percent predicted forced  
29 expiratory volume in 1 second (FEV<sub>1</sub>) ( FEV<sub>1</sub>/average %FEV<sub>1</sub> for similar  
30 age, sex and body composition) was 70.95%, and the baseline percent  
31 predicted forced vital capacity (FVC) was 63.86%. During observation  
32 period, sixty-seven patients ( 72 % ) died. The clinical characteristics of  
33 both survivors and non-survivors are summarized in Table 1.  
34  
35  
36  
37  
38  
39  
40  
41  
42  
43  
44  
45

46 The mean partial pressures of oxygen (PaO<sub>2</sub>) and carbon dioxide (PaCO<sub>2</sub>)  
47 were 63 mmHg and 43 mmHg, respectively. Thirty-two patients (34%)  
48 received home oxygen therapy and 36 ( 39% ) had pulmonary arterial  
49 hypertension. The mean systolic pulmonary arterial pressure was 62  
50 mmHg. CPFE patients frequently have been reported to have lung cancer,  
51 especially squamous cell carcinoma (10,17). However, in our cohort, only  
52 twelve (13 %) patients developed lung cancer.  
53  
54  
55  
56  
57  
58  
59  
60

1  
2  
3  
4  
5  
6  
7  
8  
9  
10  
11  
12  
13  
14  
15  
16  
17  
18  
19  
20  
21  
22  
23  
24  
25  
26  
27  
28  
29  
30  
31  
32  
33  
34  
35  
36  
37  
38  
39  
40  
41  
42  
43  
44  
45  
46  
47  
48  
49  
50  
51  
52  
53  
54  
55  
56  
57  
58  
59  
60

Among the 93 patients, twenty-two ( 24% ) developed AE, which met the ATS/ERS criteria (15). We performed univariate analysis to determine predictors of AE. Age, mMRC score, ctpattern, and baseline serum KL-6 were identified as possible predictors of AE. Logistic regression analysis was performed for these four factors, baseline serum KL-6 was found to be the strongest predictor of AE in the CPFE patients [Odds Ratio = 1.0016, P = 0.009] . ( Table 2 ) Using receiver operator characteristic curve (ROC) analysis, the useful KL-6 threshold was determined to be 1050 (ROC: 0.7720).

### HRCT Imaging and Predictors of Mortality

According to the ATS/ERS criteria (15,16 ), the patients were divided into those with UIP patterns and those with NSIP patterns. There were 68 patients in the IPF–pattern group and 25 patients in the NSIP–pattern group. The HRCT images also showed patterns indicating that 51 patients had para septal emphysema, 28 had centrilobular emphysema, and 14 had panlobular emphysema. Detailed results are presented in (Table 3).

The mean survival of CPFE patients was 30.7 months( 0.10–75.63 months). ( Figure 1 ). Patients with finger clubbing or increased ratio of %FEV<sub>1</sub> to %FVC showed poor survival in CPFE patients ( Figure 2) (Figure 3). Regarding ratio of %FEV<sub>1</sub> to %FVC, we chose 1.2 which was most useful threshold for predictor of mortality with using ROC analysis( ROC: 0.7671). Initially, we performed univariate analysis with a cutoff value of 0.1, which showed that baseline KL-6, finger clubbing, PaO<sub>2</sub>, and %FEV<sub>1</sub> / % FVC > 1.2 were independent predictors of mortality. Cox proportional hazards regression analysis showed that finger clubbing ( HR = 2.2620, P = 0.015 ) and ratio of %FEV<sub>1</sub> to % FVC more than 1.2 ( HR = 1.9259, P = 0.048 ) were the strongest independent predictors of mortality in CPFE patients at our hospital (Table 4).

### Discussion

1  
2  
3  
4  
5  
6  
7  
8  
9  
10  
11  
12  
13  
14  
15  
16  
17  
18  
19  
20  
21  
22  
23  
24  
25  
26  
27  
28  
29  
30  
31  
32  
33  
34  
35  
36  
37  
38  
39  
40  
41  
42  
43  
44  
45  
46  
47  
48  
49  
50  
51  
52  
53  
54  
55  
56  
57  
58  
59  
60

Previous studies have reported a high prevalence of PAH and lung cancer in CPFE patients (1,10). These comorbidities were associated with poor prognosis; the 1-year survival rate for CPFE patients with PAH was only 60% (6,11). Among these patients, high mean pulmonary arterial pressure, high pulmonary vascular resistance, high heart rate, and low diffusing capacity for carbon monoxide (DLco) were significantly associated with poor outcome. In one study, CPFE patients had a five fold higher mortality risk (adjusted HR: 5.10, 95%CI:1.75–14.9) in non-malignant situations (19). In the present study, only twelve of 93 patients had lung cancer in contrast to the number reported in a previous study (10). Our institution is a teaching and community hospital, and the patient population may be different from that of a university hospital.

The pulmonary function indices of the CPFE patients included in the present study were rather different from those in previous reports (1, 20). The CPFE patients in those studies had greater preserved lung volume despite reduced DLco, reduced transfer coefficient for carbon monoxide (Kco), and hypoxemia. Jankowich, et al. reported that CPFE altered physiology but had a mortality rate similar to that of IPF (21). In addition, Peng M, et al. reported similar physiology results for CPFE (22). In our study, the mean percent predicted FVC was 63.86% and that of FEV<sub>1</sub> was 70.95%, which showed more restrictive impairment compared with previous cases. This finding can be explained by the greater volume loss of the lower lung field due to severe fibrosis rather than by the offset effect of emphysema (23). This finding might also be because our cohort had less emphysema area compared with the previously reported cases. Another possibility is that the patients might have been in a different phase of CPFE. Recently, Rogliani, et al. reported the pathology of IPF and emphysema (24). They evaluated 17 biopsy-proven usual interstitial pneumonia (UIP) patients and found fibroblasts in areas of parenchymal destruction from emphysema/UIP-expressed matrix metalloproteinase (MMP)–2, MMP–9, MMP–7 and membrane type 1 (MT1)–MMP at significantly higher levels when compared with emphysema subjects. On

1  
2  
3  
4  
5  
6 the basis of this result, similar to the findings of the study by Rogliani et al.  
7 cited above, interstitial fibroblast activation could be stimulated to a  
8 greater degree in the areas of lung destruction in CPFE compared with  
9 emphysema alone, as in exaggerated tissue remodeling. Therefore, some  
10 of the CPFE patients may have had more intense fibrosis, which  
11 contributed to reduced FVC.  
12  
13  
14

15  
16 In the analysis of the HRCT images, the patients were divided into two  
17 groups by UIP (usual interstitial pneumonia ) pattern and NSIP pattern  
18 according to the ATS/ERS criteria (15,16). All of the UIP-pattern patients  
19 had honeycombing, and the NSIP-pattern patients more often had  
20 consolidation ( 60% vs. 29% ) and ground-glass opacity ( 100% vs. 34% ).  
21 These findings were very similar to those from a recent report on HRCT for  
22 NSIP (25). In addition, Sumikawa et al. reported that traction  
23 bronchiectasis and fibrosis scores were associated with poor prognosis in  
24 pathological UIP patients (26). In the present study, HRCT pattern was not  
25 an independent prognostic predictor. CPFE patients usually have more  
26 severe PAH, low cardiac index (6) and are disabled (27), which we  
27 observed in our cohort. Thus, most CPFE patients cannot tolerate invasive  
28 procedures such as VATS. Therefore, we cannot compare biopsy-proven  
29 UIP with CPFE equally.  
30  
31  
32  
33  
34  
35  
36  
37  
38  
39

40 Acute exacerbation ( AE ) is a relentlessly progressive status and is  
41 associated with poor outcome (28). Thus, we evaluated AE of CPFE.  
42 During the observation period ( mean: 30.7 months ), twenty-two patients  
43 (24 %) developed AE. The annual incidence of AE is 9.4%. This finding is  
44 similar to that reported in IPF recently (29). Kondoh, et al. reported that  
45 high modified MRC score, high body mass index (BMI), and decline in FVC  
46 at six months were significant independent risk factors for AE-IPF (30).  
47 KL-6 levels in ILD patients reflect the overall extent of interstitial lesions.  
48 Among the many clinical parameters, baseline serum KL-6 was the most  
49 powerful predictor of AE in our CPFE patients. ROC analysis showed that  
50 the useful threshold was 1050 ( ROC = 0.7720 ).  
51  
52  
53  
54  
55  
56  
57  
58  
59  
60

1  
2  
3  
4  
5  
6 Finally, we investigated the prognostic predictors of CPFE in our cohort.  
7 FVC has been reported robust powerful predictor of mortality in IPF  
8 patients (31). DLco often show variable value, so reproducibility is rather  
9 poor. In addition when FVC is reduced, DLco cannot be obtained with  
10 single breath method. Therefore, we chose %FEV<sub>1</sub>, % FVC and ratio of  
11 these value as important indices out of pulmonary function parameters.  
12 Univariate analysis revealed that KL-6, finger clubbing, PaO<sub>2</sub>, and ratio  
13 of %FEV<sub>1</sub> to % FVC were independent predictors. Regression analysis  
14 using a Cox proportional hazards model showed that finger clubbing and  
15 ratio of %FEV<sub>1</sub> to % FVC more than 1.2 were the strongest independent  
16 predictors of mortality in CPFE at our hospital. In CPFE patients, lung  
17 volume is usually preserved. Therefore, absolute value of FVC or %FVC  
18 itself has been reported to be not robust predictor of critical event.  
19 However, ratio of %FEV<sub>1</sub> to % FVC may be useful parameter in subgroup of  
20 CPFE patients. In terms of different cut-off value of this ratio, CPFE  
21 patients tend to have more mild restrictive impairment compared with that  
22 of IPF patients. Another interesting finding was that finger clubbing which  
23 is associated with poor survival in CPFE patients. Finger clubbing usually  
24 shows chronicity in ILD patients. However, it predicted clinical course in  
25 CPFE patients at our cohort. So, we insist on the importance of initial  
26 careful evaluation of physical findings in CPFE.  
27  
28  
29  
30  
31  
32  
33  
34  
35  
36  
37  
38  
39

40 This time, we did not evaluate the treatment in CPFE patients. Currently,  
41 there is no consensus on treatment of CPFE with PAH (32,33). This is a  
42 vital topic for future study.  
43  
44  
45

46 There were several limitations in our study. First, this was a single center,  
47 uncontrolled design, retrospective study, which means that it is possible  
48 that important data was not collected. Second, we did not measure the  
49 exact areas of emphysema and fibrosis. Therefore, our cohort may have  
50 been at a different stage compared with previous CPFE patients. Third,  
51 most of our patients could not undergo surgical biopsy because of  
52 disability and reduced lung function. Thus, we could not evaluate the  
53  
54  
55  
56  
57  
58  
59  
60

1  
2  
3  
4  
5  
6 detailed pathology of our CPFE patients. Fourth, we did not evaluate serial  
7 pulmonary function. Recently, Du Bois et al. reported that percent  
8 predicted FVC and the 24 week change in FVC were useful predictors of  
9 mortality in IPF (34). Therefore, it might be helpful to measure serial FVC  
10 as a prognostic predictor in CPFE. Lastly, in keeping with previous reports,  
11 our study patients were all heavy smokers. Therefore, we could not  
12 distinguish CPFE from smoking-related NSIP (35). However, even  
13 considering these limitations, prediction of prognosis using minimally  
14 invasive methods in these patients may be quite useful.  
15  
16  
17  
18  
19

20  
21 In conclusion, CPFE patients showed poor survival in our cohort. CPFE  
22 patients often develop AE, for which baseline serum KL-6 was a useful  
23 predictor. Finger clubbing and %FEV1 / % FVC more than 1.2 were  
24 independent prognostic predictors of mortality in patients with CPFE. A  
25 multicenter study of this new entity is warranted for further research.  
26  
27  
28  
29

### 30 ACKNOWLEDGEMENTS

31  
32  
33 We would like to thank all residents for their time and efforts with the  
34 collection of medical records at Okinawa Chubu Hospital. In addition, we  
35 thank Dr. Yasutani for interpretation for radiological findings.  
36  
37  
38

### 39 References

- 40  
41  
42 1 Cottin V, Nuns H, Billet PY, et al; Group d'Etude et de Recherche sur les maladies Orphelines  
43 Pulmonaries ( GERM O P ). Combined pulmonary fibrosis and emphysema: a distinct  
44 underrecognised entity. *Eur Respir J* 2005; 26: 586–593.  
45  
46  
47 2. Wiggins J, Strickland B, Turner-Warwick M. Combined cryptogenic fibrosing alveolitis and  
48 emphysema: the value of high resolution computed tomography in assessment. *Respir Med* 1990;  
49 84: 365–369.  
50  
51  
52  
53 3. Mura M, Zompatori M, Pacilli AMG, et al. The presence of emphysema further impairs physiologic  
54 function in patients with idiopathic pulmonary fibrosis. *Respir Care* 2006; 51: 257–265.  
55  
56  
57  
58  
59  
60



1  
2  
3  
4  
5  
6  
7  
8  
9  
10  
11  
12  
13  
14  
15  
16  
17  
18  
19  
20  
21  
22  
23  
24  
25  
26  
27  
28  
29  
30  
31  
32  
33  
34  
35  
36  
37  
38  
39  
40  
41  
42  
43  
44  
45  
46  
47  
48  
49  
50  
51  
52  
53  
54  
55  
56  
57  
58  
59  
60

4. Strickland NH, Hughes JM, Hart DA, et al. Cause of regional ventilation-perfusion mismatching in patients with idiopathic pulmonary fibrosis: a combined CT and scintigraphic study. *AJR Am J Roentgenol*, 1993; 161: 719–725.

5. Doherty MJ, Pearson MG, O'Grady EA, et al. Cryptogenic fibrosing alveolitis with preserved lung volumes. *Thorax* 1997; 52: 998–1002.

6. Cottin V, Le Pavec J, Prevot G, et al (GERM O P). Pulmonary hypertension in patients with combined pulmonary fibrosis and emphysema syndrome, *Eur. Respir J* 2010; 35 (1): 105–111.

7. Lettieri CJ, Nathan SD, Barnett SD, et al. Prevalence and outcomes of pulmonary arterial hypertension in advanced idiopathic pulmonary fibrosis. *Chest* 2006; 129: 746–752.

8. Hamada K, Nagai S, Tanaka S, et al. Significance of pulmonary arterial pressure and diffusion capacity of the lung as prognosticator in patients with idiopathic pulmonary fibrosis. *Chest* 2007; 131: 650–656.

9. Oswald-Mammosser M, Weitzenblum E, Quoix E, et al. Prognostic factors in COPD patients receiving long-term oxygen therapy. Importance of pulmonary artery pressure. *Chest* 1995; 107: 1193–1198.

10. Usui K, Tanai C, Tanaka Y, et al. The prevalence of pulmonary fibrosis combined with emphysema in patients with lung cancer. *Respirology* 2011; 16: 326–331.

11. Cottin V, Cordier JF. The syndrome of combined pulmonary fibrosis and emphysema. *Chest* 2009; 136: 1–2.

12. Mejia M, Carrillo G, Rojas-Serrano J, et al. Idiopathic pulmonary fibrosis and emphysema: decreased survival associated with severe pulmonary arterial hypertension. *Chest* 2009; 136: 10–15.

13. Thabut G, Dauriat G, Stern JB, et al. Pulmonary hemodynamics in advanced COPD candidates for lung volume reduction surgery or lung transplantation. *Chest* 2005; 127: 1531–1536.

14. Chaouat A, Naeije R, Weitzenblum E. Pulmonary hypertension in COPD. *Eur Respir J* 2008; 32: 1371–1385.



1  
2  
3  
4  
5  
6  
7  
8  
9  
10  
11  
12  
13  
14  
15  
16  
17  
18  
19  
20  
21  
22  
23  
24  
25  
26  
27  
28  
29  
30  
31  
32  
33  
34  
35  
36  
37  
38  
39  
40  
41  
42  
43  
44  
45  
46  
47  
48  
49  
50  
51  
52  
53  
54  
55  
56  
57  
58  
59  
60

15. American Thoracic Society. American Thoracic Society/European Respiratory Society International Multidisciplinary Consensus Classification of the Idiopathic Interstitial Pneumonias. *Am J Respir Crit Care Med* 2002; 165: 277–304.

16. Raghu G, Collard H, Egan J, et al; ATS/ERS/JRS/ALAT Committee on Idiopathic Pulmonary Fibrosis. An Official ATS/ERS/JRS/ALAT Statement: Idiopathic Pulmonary Fibrosis: Evidence-based Guidelines for Diagnosis and Management. *Am J Respir Crit Care Med* 2011;183: 788–824.

17. Kitaguchi Y, Fujimoto K, Hanaoka M, et al. Clinical characteristics of combined pulmonary fibrosis and emphysema. *Respirology* 2010;156:265–271.

18. Collard HR, Moore BB, Flaherty KR, et al. Idiopathic Pulmonary Fibrosis Clinical Research Network Investigators. Acute exacerbations of idiopathic pulmonary fibrosis. *Am J Respir Crit Care Med* 2007;176:636–643.

19. Lee CH, Kim HJ, Park CM, et al. The impact of combined pulmonary fibrosis and emphysema on mortality. *Int J Tuberc Lung Dis* 2011; 15(8):1111–1116.

20. Akagi T, Matsumoto T, Harada T, et al. Coexistent emphysema delays the decrease of vital capacity in idiopathic pulmonary fibrosis. *Respir Med*. 2009; 103(8):1209–1215.

21. Jankowich MD, Rounds S. Combined pulmonary fibrosis and emphysema alters physiology but has similar mortality to pulmonary fibrosis without emphysema. *Lung* 2010; 188(5): 365–373.

22. Peng M, Cai F, Tian XL, et al. Combined pulmonary fibrosis and emphysema syndrome. *Zhonghua Jie He He Hu Xi Za Zhi* 2010; 33(7): 515–518.

23. Wells A, Desai S, Rubens M, et al. Idiopathic Pulmonary Fibrosis: A Composite Physiologic Index Derived from Disease Extent Observed by Computed Tomography. *Am J Respir Crit Care Med* 2003; 167: 962–969.

24. Rogliani P, Mura M, Mattia P, et al. HRCT and histopathological evaluation of fibrosis and tissue destruction in IPF associated with pulmonary emphysema. *Respir Med* 2008;102(12):1753–1761.

25. Hozumi H, Nakamura Y, Johkoh T, et al. Nonspecific Interstitial Pneumonia: Prognostic Significance of High-Resolution Computed Tomography in 59 Patients. *J Comput Assist Tomogr* 2011; 35: 583–589.

- 1  
2  
3  
4  
5  
6  
7  
8  
9  
10  
11  
12  
13  
14  
15  
16  
17  
18  
19  
20  
21  
22  
23  
24  
25  
26  
27  
28  
29  
30  
31  
32  
33  
34  
35  
36  
37  
38  
39  
40  
41  
42  
43  
44  
45  
46  
47  
48  
49  
50  
51  
52  
53  
54  
55  
56  
57  
58  
59  
60
26. Sumikawa H, Johkoh T, Colby T, et al. Computed Tomography Findings in Pathological Usual Interstitial Pneumonia Relationship to Survival. *Am J Respir Crit Care Med* 2008;177:433–439.
27. Nathan SD, Shlobin OA, Barnett SD, et al. Right ventricular systolic pressure by echocardiography as a predictor of pulmonary hypertension in idiopathic pulmonary fibrosis. *Respir Med* 2008; 102: 1305–1310.
28. Ley B, Collard H, King T. Clinical Course and Prediction of Survival in Idiopathic Pulmonary Fibrosis. *Am J Respir Crit Care Med* 2011;183:431–440.
29. Song JW, Hong SB, Lim CM, et al. Acute exacerbation of idiopathic pulmonary fibrosis: incidence, risk factors and outcome. *Eur Respir J* 2011; 37: 356–363.
30. Kondoh Y, Taniguchi H, Katsuta T, et al. Risk factors of acute exacerbation of idiopathic pulmonary fibrosis. *Sarcoidosis Vasc Diffuse Lung Dis* 2010 July; 27(2):103–110.
31. Roland M, du Bois, Derek Weycker, Carlo Albera, et al. Forced Vital Capacity in Patients with Idiopathic Pulmonary Fibrosis. Test Properties and Minimal Clinically Important Difference. *Am J Respir Crit Care Med* 2011;184:1382-1389.
32. Cushley MJ, Davison AG, du Bois RM, et al. The diagnosis, assessment and treatment of diffuse parenchymal lung disease in adults. *Thorax* 1999; 54: S1–S30.
33. Portillo Carroz K, Roldan Sanchez J, Morera Prat J. Combined pulmonary fibrosis and emphysema. *Arch Bronchoneumol* 2010; 46(12):646–51.
34. du Bois R, Weycker D, Albera C, et al. Ascertainment of Individual Risk of Mortality for Patients with Idiopathic Pulmonary Fibrosis. *Am J Respir Crit Care Med* 2011;184:459–466.
35. Marten K, Milne D, Antoniou K, et al. Non-specific interstitial pneumonia in cigarette smokers: a CT study. *Eur Radiol* 2009; 19: 1679–1685.

## Figure Legends:

### Figure 1; Flow diagram in CPFE patients

Figure 2; Survival curve in CPFE patients

Figure 3; CPFE patients with clubbing show poor survival compared with that of without clubbing

Figure 4; Ratio of %FEV<sub>1</sub> and %FVC more than 1.2 show poor survival rather than that of less than 1.2 in CPFE patients

TABLE 1. Patient clinical characteristics in CPFE

|                            | Survivors<br>( n= 26 )    | Non-survivors<br>( n= 67 ) | p-value  |
|----------------------------|---------------------------|----------------------------|----------|
| Age, year (mean)           | 73.19 ± 1.18<br>(57-84)   | 73.83 ± 7.07<br>(56-91)    | 0.5815   |
| Male sex, %                | 85                        | 81                         | 0.6570   |
| Pack-year                  | 60 ±<br>22.0( 5-110 )     | 64 ± 31.4 ( 0-180 )        | 0.5754   |
| mMRC scale                 | 2.6 ± 0.88<br>( 1-4 )     | 2.5 ± 0.93 ( 1-4 )         | 0.5091   |
| Dyspnea duration<br>months | 11.04 ± 5.73<br>( 0-18 )  | 13.07 ± 14.20<br>( 0-96 )  | 0.4821   |
| Clubbing, %                | 12                        | 55                         | < 0.0001 |
| KL-6, IU/L                 | 852 ± 278<br>( 505-1200 ) | 1174 ± 725<br>( 201-4250 ) | 0.0413   |

|                                           |                                              |                                              |                    |
|-------------------------------------------|----------------------------------------------|----------------------------------------------|--------------------|
| <b>Systolic PAP, mmHg</b>                 | <b>45</b>                                    | <b>75</b>                                    | <b>&lt; 0.0001</b> |
| <b>Baseline FEV<sub>1</sub>,%</b>         | <b>71.14 ± 8.72</b><br><b>( 59.6-103.9 )</b> | <b>70.88 ± 9.25</b><br><b>( 31.4-106.3 )</b> | <b>0.9128</b>      |
| <b>Baseline FVC,%</b>                     | <b>68.52 ± 9.09</b><br><b>( 57-99.7 )</b>    | <b>61.89 ± 9.48</b><br><b>( 24.9-82.3 )</b>  | <b>0.0058</b>      |
| <b>HOT , %</b>                            | <b>12</b>                                    | <b>43</b>                                    | <b>0.0035</b>      |
| <b>Paraseptal emphysema, %</b>            | <b>19</b>                                    | <b>69</b>                                    | <b>&lt; 0.0001</b> |
| <b>Acute exacerbation, n(%)</b>           | <b>0 (0)</b>                                 | <b>22 (32)</b>                               | <b>0.0007</b>      |
| <b>%FEV<sub>1</sub> / %FVC &gt;1.2, %</b> | <b>19</b>                                    | <b>79</b>                                    | <b>&lt; 0.0001</b> |
| <b>Cancer, %</b>                          | <b>0</b>                                     | <b>18</b>                                    | <b>0.1068</b>      |
| <b>Cardiovascular, %</b>                  | <b>27</b>                                    | <b>40</b>                                    | <b>0.2339</b>      |
| <b>Ejection fraction. %</b>               | <b>58.2 ± 3.90</b>                           | <b>56.9 ± 5.19</b>                           | <b>0.2337</b>      |
| <b>Survival time , months</b>             | <b>50.16 ± 17.79</b><br><b>( 26 – 96 )</b>   | <b>25.68 ± 21.54</b><br><b>( 1 – 98 )</b>    | <b>&lt; 0.0001</b> |

Data are presented as mean ± SD and mean %predicted ± SD

Definitions of abbreviations: IPF = Idiopathic Pulmonary Fibrosis; NSIP = Non Specific Interstitial Pneumonia; mMRC = modified Medical Research Council; FEV<sub>1</sub>= forced expired volume in one second; FVC = forced vital capacity; HOT = Home Oxygen Therapy

Table 2. Predictor of acute exacerbation in CPFE patients

|                  | Odds Ratio | 95% CI        | p-value |
|------------------|------------|---------------|---------|
| Age              | 0.9691     | 0.8985-1.0453 | 0.417   |
| mMRC scale       | 0.6681     | 0.3538-1.2616 | 0.214   |
| Dyspnea duration | 0.8967     | 0.8169-0.9844 | 0.022   |
| Baseline KL-6    | 1.0016     | 1.0003-1.0027 | 0.009   |
| CT pattern       | 0.7612     | 0.2247-2.5779 | 0.661   |

Definitions of abbreviations: CI= confidence interval, mMRC = modified Medical Research Council

Table 3. HRCT Imaging in CPFE patients

|                      | UIP<br>pattern<br>( n=68 ) | NSIP<br>Pattern<br>( n= 25 ) | All<br>( n= 93 ) |
|----------------------|----------------------------|------------------------------|------------------|
| Emphysema<br>pattern |                            |                              |                  |
| Paraseptal,%         | 57                         | 48                           | 55               |

|                                   |            |            |           |
|-----------------------------------|------------|------------|-----------|
| <b>Centrilobular, %</b>           | <b>29</b>  | <b>32</b>  | <b>30</b> |
| <b>Panlobular, %</b>              | <b>14</b>  | <b>20</b>  | <b>15</b> |
| <b>Fibrosis pattern</b>           |            |            |           |
| <b>Traction bronchiectasis, %</b> | <b>96</b>  | <b>88</b>  | <b>94</b> |
| <b>Reticulation, %</b>            | <b>91</b>  | <b>88</b>  | <b>90</b> |
| <b>Honeycombing, %</b>            | <b>100</b> | <b>0</b>   | <b>73</b> |
| <b>Ground glass opacity, %</b>    | <b>34</b>  | <b>100</b> | <b>52</b> |
| <b>Consolidation, %</b>           | <b>29</b>  | <b>60</b>  | <b>38</b> |

**Definitions of abbreviations: HRCT = High resolution computed tomography ; IPF = Idiopathic pulmonary fibrosis ; NSIP = Non specific interstitial pneumonia.**

**Table 4. Results of the Cox proportional hazards regression analysis of mortality in CPFE patients**

|                                    | <b>Hazards ratio</b> | <b>95% CI</b>        | <b>P-value</b> |
|------------------------------------|----------------------|----------------------|----------------|
| <b>Finger clubbing</b>             | <b>2.2620</b>        | <b>1.1746-4.3560</b> | <b>0.015</b>   |
| <b>%FEV1/%FVC<br/>( &gt; 1.2 )</b> | <b>1.9259</b>        | <b>1.0057-3.6883</b> | <b>0.048</b>   |

**Definitions of abbreviations: CI = confidence interval ; FVC = forced vital capacity.**

1  
2  
3  
4  
5  
6  
7  
8  
9  
10  
11  
12  
13  
14  
15  
16  
17  
18  
19  
20  
21  
22  
23  
24  
25  
26  
27  
28  
29  
30  
31  
32  
33  
34  
35  
36  
37  
38  
39  
40  
41  
42  
43  
44  
45  
46  
47  
48  
49  
50  
51  
52  
53  
54  
55  
56  
57  
58  
59  
60

For peer review only

**A Cohort Study of mortality predictors and characteristics of patients with combined pulmonary fibrosis and emphysema**

**Tomoo Kishaba<sup>1</sup>, Yousuke Shimaoka<sup>1</sup>, Hajime Fukuyama<sup>1</sup>, Kyoko Yoshida<sup>2</sup>, Maki Noyama<sup>3</sup>, Shin Yamashiro<sup>1</sup>, Hitoshi Tamaki<sup>1</sup>**

**<sup>1</sup>Department of Respiratory Medicine, Okinawa Chubu Hospital, Okinawa, Japan**

**<sup>2</sup> Department of home care, Nakamura Clinic**

**<sup>3</sup> Department of Respiratory Medicine, Kurashiki Central Hospital**

**Corresponding author and request for reprints:**

**Tomoo Kishaba**

**Department of Respiratory Medicine, Okinawa Chubu Hospital**

**Miyazato 281, Uruma City, Okinawa 904-2293, Japan**

**Telephone: +81 98 973 4111**

**Fax: +81 98 974 5165**

**E-mail: kishabatomoo@gmail.com**

**Total Word Count: 2448**

**Author Contributions:**

**T Kishaba, H Tamaki: Study concept and design, acquisition and interpretation of data, and drafting and finalization of the manuscript.**

**Y Shimaoka, H Fukuyama, K Yoshida, M Tanaka, S Yamashiro: Study design, and acquisition and interpretation of data.**

**Subject Heading: Mortality predictors in CPFE**



1  
2  
3  
4  
5  
6  
7  
8  
9  
10  
11  
12  
13  
14  
15  
16  
17  
18  
19  
20  
21  
22  
23  
24  
25  
26  
27  
28  
29  
30  
31  
32  
33  
34  
35  
36  
37  
38  
39  
40  
41  
42  
43  
44  
45  
46  
47  
48  
49  
50  
51  
52  
53  
54  
55  
56  
57  
58  
59  
60

**Article Focus:** Combined pulmonary fibrosis and emphysema (CPFE) has recently been recognized as a new entity. Prognosis is often poor, and pulmonary hypertension is common. There is little information on clinical parameters and predictors of mortality.

**What is the most useful clinical predictor of mortality in CPFE?**

**What is the most informative physiologic predictor of mortality in CPFE?**

**What is the most sensitive clinical predictor of acute exacerbation in CPFE?**

**The study aim was to investigate non-invasive predictors of mortality in CPFE.**

**Key Messages:** From a clinical point of view, finger clubbing is useful predictor of mortality in CPFE. In addition, ratio of percent predicted forced expiratory volume in 1 second (%FEV<sub>1</sub>) and percent predicted forced vital capacity (%FVC) more than 1.2% were independent predictors of mortality in patients with CPFE too. Prediction of prognosis of these patients by minimally invasive methods may be quite useful.

**Strengths and Limitations:** This study's strength was the definition of noninvasive, easily obtainable clinical and physiological measures of prognosis in CPFE. The major limitation of the study is the single-center retrospective design.

#### **Abstract**

**Objectives:** Our purpose was to assess the clinical data, predictors of mortality, acute exacerbation in CPFE patients.

**Design:** Single centre retrospective cohort study.

**Setting:** Teaching hospital in Japan.

**Participants:** We identified 93 CPFE patients with high-resolution computed tomographic (HRCT) through multidisciplinary discussion. Patients who had connective tissue disease (CTD), drug-associated ILD, and occupationally related ILD, such as asbestosis and silicosis were excluded.

**Interventions:** There were no interventions.

**Methods:** Medical records and HRCT scans from January 2002 through December 2007 were reviewed retrospectively at our hospital. Ninety-three patients had CPFE.

**Results:** The mean age of CPFE patients was 74 years. IPF and nonspecific

1  
2  
3  
4  
5  
6 interstitial pneumonia (NSIP) were observed as distinct HRCT patterns.  
7 **Forty two** patients showed finger clubbing. Mean serum Krebs von den  
8 Lungen-6 (KL-6) and percent predicted forced vital capacity (%FVC) were  
9 1089 IU/L, 63.86% respectively. Twenty-two patients developed acute  
10 exacerbation during observation period. Baseline KL-6 was a strong  
11 predictor of acute exacerbation. ( Odds Ratio = 1.0016, P = 0.009 ). Finger  
12 clubbing ( Hazards Ratio = 2.2620, P = 0.015 ) and percent predicted forced  
13 expiratory volume in 1 second (%FEV<sub>1</sub>) / % FVC more than 1.2 ( Hazards  
14 Ratio = 1.9259, P = 0.048) were independent predictors of mortality in CPFE.  
15  
16  
17  
18  
19  
20  
21  
22  
23  
24  
25  
26  
27  
28  
29  
30  
31  
32  
33  
34  
35  
36  
37  
38  
39  
40  
41  
42  
43  
44  
45  
46  
47  
48  
49  
50  
51  
52  
53  
54  
55  
56  
57  
58  
59  
60

Key words: mortality; acute exacerbation; finger clubbing;

KL-6 ; %FEV<sub>1</sub>/%FVC

There is no additional data available

Key words: mortality; acute exacerbation; finger clubbing;

KL-6 ; %FEV<sub>1</sub>/%FVC

Total Abstract Count: 243

Combined pulmonary fibrosis and emphysema (CPFE) has been recognized as a unique entity that is characterized by upper lobe emphysema and lower lobe fibrosis (1). Emphysema is sometimes associated with idiopathic pulmonary fibrosis (IPF) and usually occurs with elevated lung volume." should be "**Emphysema is sometimes recognized in the setting of idiopathic pulmonary fibrosis (IPF), (2-3) and patients with both emphysema and fibrosis (CPFE) usually have elevated lung volumes compared to patients with IPF alone.** In CPFE, lung volume is preserved in many patients, even in those at advanced stages, because supervening fibrosis offsets the effect of emphysema (3–5). CPFE patients also more often have pulmonary arterial hypertension (PAH) (6). PAH has been shown to be a significant prognostic indicator for both IPF (7,8) and

1  
2  
3  
4  
5  
6  
7  
8  
9  
10  
11  
12  
13  
14  
15  
16  
17  
18  
19  
20  
21  
22  
23  
24  
25  
26  
27  
28  
29  
30  
31  
32  
33  
34  
35  
36  
37  
38  
39  
40  
41  
42  
43  
44  
45  
46  
47  
48  
49  
50  
51  
52  
53  
54  
55  
56  
57  
58  
59  
60

chronic obstructive pulmonary disease (COPD) (9). In patients with lung cancer , CPFE is more prevalent than fibrosis (10). Recently, CPFE syndrome has been individualized, partly on the basis of distinct characteristics observed by high-resolution computed tomography (HRCT) of the chest (11).

There is very little information on predictors of mortality for CPFE (1,12). Patients with CPFE often have severe dyspnea and poor cardiopulmonary reserve (13,14), and many patients cannot tolerate invasive procedures such as video-assisted thoracic surgery (VATS).

Thus, the objective of the present study was to determine the predictors of acute exacerbation and mortality in CPFE patients using **noninvasive methods**.

## Methods

### Study Population and HRCT Assessment

We retrospectively investigated our medical records and high-resolution computed tomographic (HRCT) scans from Okinawa Chubu Hospital, Okinawa, Japan from January 1, 2002 through December 31, 2007. During this period we had 319 interstitial lung disease( ILD ) patients Eligible patients were men and women aged 18 years or older with a proven diagnosis of IPF or nonspecific interstitial pneumonia (NSIP) according to the American Thoracic Society/ European Respiratory Society (ATS/ERS) statement (15). Among all ILD patients, we identified 93 CPFE patients through multidisciplinary discussion including our pulmonologists and radiologists. We excluded patients if; 1) they were without HRCT imaging, 2) had connective tissue disease (CTD), 3) had drug-associated ILD, and 4) had occupationally related ILD, such as asbestosis and silicosis.

Demographic and clinical data were obtained, including age, gender, smoking history, dyspnea duration, comorbidity, crackles,clubbing, Krebs von den Lungen-6 (KL-6) levels and Ultrasound Cardiography(UCG)findings. In terms of pulmonary arterial hypertension

1  
2  
3  
4  
5  
6 ( PAH ), we estimated with UCG .We also checked physiological data  
7 including forced expiratory volume in 1 second (FEV<sub>1</sub>), %FEV<sub>1</sub>, forced vital  
8 capacity (FVC), and %FVC. We only included pulmonary function data  
9 determined within six months of the date of HRCT.  
10

11  
12  
13 The HRCT scan imaging patterns were evaluated according to the  
14 ATS/ERS criteria (15). We diagnosed IPF patients using the new ATS/ERS  
15 and Japanese Respiratory Society /Latin America Thoracic Association  
16 criteria (16). Patients who met the following criteria, as described by Cottin  
17 et al. (1 ), were diagnosed as having CPFE: (1) the presence of emphysema  
18 on CT, defined as well-demarcated areas of decreased attenuation  
19 compared with contiguous normal lung, margined by a very thin (<1 mm)  
20 wall or no wall, and/or multiple bullae (>1 cm) with upper-zone  
21 predominance, and (2) the presence of significant pulmonary fibrosis on  
22 CT, defined as reticular opacities with peripheral and basal predominance,  
23 with or without traction bronchiectasis that occurs with or without  
24 honeycombing. Regarding acute exacerbation, we defined by the following  
25 criteria (18):(1) sudden deterioration of dyspnea within 30 days (2) new  
26 bilateral infiltration on chest radiograph (3)pulmonary infection or other  
27 known causes were excluded by bronchoalveolar lavage(BAL). Survival  
28 time was defined from the date of HRCT to death or last observation date.  
29 The Ethics Committee of Okinawa Chubu Hospital approved this study  
30 protocol.  
31  
32  
33  
34  
35  
36  
37  
38  
39  
40  
41  
42

### 43 Statistical Methods

44  
45 Clinical data are presented as means  $\pm$  SDs or medians (range), depending  
46 on distribution. Group comparisons were made using unpaired t-tests, the  
47 Wilcoxon rank sum test, Chi-squared statistics, and Fisher's exact test, as  
48 appropriate. Logistic regression analysis was performed to determine the  
49 relationship between clinical parameters and acute exacerbation. A Cox  
50 proportional hazards model analysis was performed to determine the  
51 relationships between clinical parameters, physiological indices, HRCT  
52 imaging patterns and survival. Clinical data analyses were performed  
53  
54  
55  
56  
57  
58  
59  
60

1  
2  
3  
4  
5 using STATA software Version 11.0 (Stata Corp, College Station, TX, USA).  
6 Statistical significance was defined as a P value less than 0.05.  
7  
8

## 9 Results

### 10 Patient Characteristics, Acute Exacerbation ( AE ), and Clinical Parameters

11  
12 The flow diagram in Figure 1 shows how the patients were identified.

13  
14 **Ninety-three CPFE patients (76 men , 17 women) were identified between**  
15 **2002 and 2007.** The mean age was 73 years, and 82 % of the patients were  
16 males. The mean time from symptoms to diagnosis was 12.68 months (0–  
17 96 months). The mean follow-up period was 30.7 months (0–74.6 months).  
18 All patients had histories of smoking ( mean: 62 pack-years ). The mean  
19 modified Medical Research Council (mMRC) breathlessness score was 2.5.  
20 Bibasilar fine crackles were auscultated in all patients and forty-two  
21 ( 45 % ) had finger clubbing. The baseline percent predicted forced  
22 expiratory volume in 1 second (FEV<sub>1</sub>) ( FEV<sub>1</sub>/average %FEV<sub>1</sub> for similar  
23 age, sex and body composition) was 70.95%, and the baseline percent  
24 predicted forced vital capacity (FVC) was 63.86%. During observation  
25 period, sixty-seven patients ( 72 % ) died. The clinical characteristics of  
26 both survivors and non-survivors are summarized in Table 1.  
27  
28  
29  
30  
31  
32  
33  
34  
35  
36

37  
38 The mean partial pressures of oxygen (PaO<sub>2</sub>) and carbon dioxide (PaCO<sub>2</sub>)  
39 were 63 mmHg and 43 mmHg, respectively. Thirty-two patients (34%)  
40 received home oxygen therapy and 36 ( 39% ) had pulmonary arterial  
41 hypertension. The mean systolic pulmonary arterial pressure was 62  
42 mmHg. CPFE patients frequently have been reported to have lung cancer,  
43 especially squamous cell carcinoma (10,17). However, in our cohort, only  
44 twelve (13 %) patients developed lung cancer.  
45  
46  
47  
48  
49

50  
51 Among the 93 patients, twenty-two ( 24% ) developed AE, which met the  
52 ATS/ERS criteria (15). We performed univariate analysis to determine  
53 predictors of AE. Age, mMRC score, ctpattern, and baseline serum KL-6  
54 were identified as possible predictors of AE. Logistic regression analysis  
55  
56  
57  
58  
59  
60

1  
2  
3  
4  
5 was performed for these four factors, baseline serum KL-6 was found to be  
6 the strongest predictor of AE in the CPFE patients [Odds Ratio = 1.0016, P  
7 = 0.009] . ( Table 2 ) Using receiver operator characteristic curve (ROC)  
8 analysis, the useful KL-6 threshold was determined to be 1050 (ROC:  
9 0.7720).

### 14 HRCT Imaging and Predictors of Mortality

15  
16  
17 According to the ATS/ERS criteria (15,16 ), the patients were divided into  
18 those with UIP patterns and those with NSIP patterns. There were 68  
19 patients in the IPF–pattern group and 25 patients in the NSIP–pattern  
20 group. The HRCT images also showed patterns indicating that 51 patients  
21 had para septal emphysema, 28 had centrilobular emphysema, and 14 had  
22 panlobular emphysema. Detailed results are presented in (Table 3).

23  
24  
25 The mean survival of CPFE patients was 30.7 months( 0.10–75.63 months).  
26 ( Figure 1 ). Patients with finger clubbing or increased ratio of %FEV<sub>1</sub>  
27 to %FVC showed poor survival in CPFE patients ( Figure 2) (Figure 3).  
28 Regarding ratio of %FEV<sub>1</sub> to %FVC, we chose 1.2 which was most useful  
29 threshold for predictor of mortality with using ROC analysis( ROC: 0.7671).  
30 Initially, we performed univariate analysis with a cutoff value of 0.1, which  
31 showed that baseline KL-6, finger clubbing, PaO<sub>2</sub>, and %FEV<sub>1</sub> / % FVC >  
32 1.2 were independent predictors of mortality. Cox proportional hazards  
33 regression analysis showed that finger clubbing ( HR = 2.2620, P = 0.015 )  
34 and ratio of %FEV<sub>1</sub> to % FVC more than 1.2 ( HR = 1.9259, P = 0.048 ) were  
35 the strongest independent predictors of mortality in CPFE patients at our  
36 hospital (Table 4).

### 47 Discussion

48  
49  
50 Previous studies have reported a high prevalence of PAH and lung cancer  
51 in CPFE patients (1,10). These comorbidities were associated with poor  
52 prognosis; the 1-year survival rate for CPFE patients with PAH was only  
53 60% (6,11). Among these patients, high mean pulmonary arterial pressure,  
54  
55  
56  
57  
58  
59  
60

1  
2  
3  
4  
5  
6 high pulmonary vascular resistance, high heart rate, and low diffusing  
7 capacity for carbon monoxide (DLco) were significantly associated with  
8 poor outcome. In one study, CPFE patients had a five fold higher mortality  
9 risk (adjusted HR: 5.10, 95%CI:1.75–14.9) in non-malignant situations (19).  
10 In the present study, only twelve of 93 patients had lung cancer in contrast  
11 to the number reported in a previous study (10). Our institution is a  
12 teaching and community hospital, and the patient population may be  
13 different from that of a university hospital.  
14  
15  
16  
17  
18

19  
20 The pulmonary function indices of the CPFE patients included in the  
21 present study were rather different from those in previous reports (1, 20).  
22 The CPFE patients in those studies had greater preserved lung volume  
23 despite reduced DLco, reduced transfer coefficient for carbon monoxide  
24 (Kco), and hypoxemia. Jankowich, et al. reported that CPFE altered  
25 physiology but had a mortality rate similar to that of IPF (21). In addition,  
26 Peng M, et al. reported similar physiology results for CPFE (22). In our  
27 study, the mean percent predicted FVC was 63.86% and that of FEV<sub>1</sub> was  
28 70.95%, which showed more restrictive impairment compared with  
29 previous cases. This finding can be explained by the greater volume loss  
30 of the lower lung field due to severe fibrosis rather than by the offset effect  
31 of emphysema (23). This finding might also be because our cohort had  
32 less emphysema area compared with the previously reported cases.  
33 Another possibility is that the patients might have been in a different  
34 phase of CPFE. Recently, Rogliani, et al. reported the pathology of IPF and  
35 emphysema (24). They evaluated 17 biopsy-proven usual interstitial  
36 pneumonia (UIP) patients and found fibroblasts in areas of parenchymal  
37 destruction from emphysema/UIP-expressed matrix metalloproteinase  
38 (MMP)–2, MMP–9, MMP–7 and membrane type 1 (MT1)–MMP at  
39 significantly higher levels when compared with emphysema subjects. On  
40 the basis of this result, similar to the findings of the study by Rogliani et al.  
41 cited above, interstitial fibroblast activation could be stimulated to a  
42 greater degree in the areas of lung destruction in CPFE compared with  
43 emphysema alone, as in exaggerated tissue remodeling. Therefore, some  
44  
45  
46  
47  
48  
49  
50  
51  
52  
53  
54  
55  
56  
57  
58  
59  
60



1  
2  
3  
4  
5 of the CPFE patients may have had more intense fibrosis, which  
6 contributed to reduced FVC.  
7  
8

9  
10 In the analysis of the HRCT images, the patients were divided into two  
11 groups by UIP (usual interstitial pneumonia ) pattern and NSIP pattern  
12 according to the ATS/ERS criteria (15,16). All of the UIP-pattern patients  
13 had honeycombing, and the NSIP-pattern patients more often had  
14 consolidation ( 60% vs. 29% ) and ground-glass opacity ( 100% vs. 34% ).  
15 These findings were very similar to those from a recent report on HRCT for  
16 NSIP (25). In addition, Sumikawa et al. reported that traction  
17 bronchiectasis and fibrosis scores were associated with poor prognosis in  
18 pathological UIP patients (26). In the present study, HRCT pattern was not  
19 an independent prognostic predictor. CPFE patients usually have more  
20 severe PAH, low cardiac index (6) and are disabled (27), which we  
21 observed in our cohort. Thus, most CPFE patients cannot tolerate invasive  
22 procedures such as VATS. Therefore, we cannot compare biopsy-proven  
23 UIP with CPFE equally.  
24  
25

26  
27 Acute exacerbation ( AE ) is a relentlessly progressive status and is  
28 associated with poor outcome (28). Thus, we evaluated AE of CPFE.  
29 During the observation period ( mean: 30.7 months ), twenty-two patients  
30 (24 %) developed AE. The annual incidence of AE is 9.4%. This finding is  
31 similar to that reported in IPF recently (29). Kondoh, et al. reported that  
32 high modified MRC score, high body mass index (BMI), and decline in FVC  
33 at six months were significant independent risk factors for AE-IPF (30).  
34 KL-6 levels in ILD patients reflect the overall extent of interstitial lesions.  
35 Among the many clinical parameters, baseline serum KL-6 was the most  
36 powerful predictor of AE in our CPFE patients. ROC analysis showed that  
37 the useful threshold was 1050 ( ROC = 0.7720 ).  
38  
39

40  
41 Finally, we investigated the prognostic predictors of CPFE in our cohort.  
42 FVC has been reported robust powerful predictor of mortality in IPF  
43 patients (31). DLco often show variable value, so reproducibility is rather  
44  
45  
46  
47  
48  
49  
50  
51  
52  
53  
54  
55  
56  
57  
58  
59  
60



1  
2  
3  
4  
5  
6 poor. In addition when FVC is reduced, DLco cannot be obtained with  
7 single breath method. Therefore, we chose %FEV<sub>1</sub>, % FVC and ratio of  
8 these value as important indices out of pulmonary function parameters.  
9 Univariate analysis revealed that KL-6, finger clubbing, PaO<sub>2</sub>, and ratio  
10 of %FEV<sub>1</sub> to % FVC were independent predictors. Regression analysis  
11 using a Cox proportional hazards model showed that finger clubbing and  
12 ratio of %FEV<sub>1</sub> to % FVC more than 1.2 were the strongest independent  
13 predictors of mortality in CPFE at our hospital. In CPFE patients, lung  
14 volume is usually preserved. Therefore, absolute value of FVC or %FVC  
15 itself has been reported to be not robust predictor of critical event.  
16 However, ratio of %FEV<sub>1</sub> to % FVC may be useful parameter in subgroup of  
17 CPFE patients. In terms of different cut-off value of this ratio, CPFE  
18 patients tend to have more mild restrictive impairment compared with that  
19 of IPF patients. Another interesting finding was that finger clubbing which  
20 is associated with poor survival in CPFE patients. Finger clubbing usually  
21 shows chronicity in ILD patients. However, it predicted clinical course in  
22 CPFE patients at our cohort. So, we insist on the importance of initial  
23 careful evaluation of physical findings in CPFE.  
24  
25  
26  
27  
28  
29  
30  
31  
32  
33  
34

35 This time, we did not evaluate the treatment in CPFE patients. Currently,  
36 there is no consensus on treatment of CPFE with PAH (32,33). This is a  
37 vital topic for future study.  
38  
39  
40

41 There were several limitations in our study. First, this was a single center,  
42 uncontrolled design, retrospective study, which means that it is possible  
43 that important data was not collected. Second, we did not measure the  
44 exact areas of emphysema and fibrosis. Therefore, our cohort may have  
45 been at a different stage compared with previous CPFE patients. Third,  
46 most of our patients could not undergo surgical biopsy because of  
47 disability and reduced lung function. Thus, we could not evaluate the  
48 detailed pathology of our CPFE patients. Fourth, we did not evaluate serial  
49 pulmonary function. Recently, Du Bois et al. reported that percent  
50 predicted FVC and the 24 week change in FVC were useful predictors of  
51  
52  
53  
54  
55  
56  
57  
58  
59  
60

1  
2  
3  
4  
5 mortality in IPF (34). Therefore, it might be helpful to measure serial FVC  
6 as a prognostic predictor in CPFE. Lastly, in keeping with previous reports,  
7 our study patients were all heavy smokers. Therefore, we could not  
8 distinguish CPFE from smoking-related NSIP (35). However, even  
9 considering these limitations, prediction of prognosis using minimally  
10 invasive methods in these patients may be quite useful.  
11  
12  
13  
14

15  
16 In conclusion, CPFE patients showed poor survival in our cohort. CPFE  
17 patients often develop AE, for which baseline serum KL-6 was a useful  
18 predictor. Finger clubbing and %FEV1 / % FVC more than 1.2 were  
19 independent prognostic predictors of mortality in patients with CPFE. A  
20 multicenter study of this new entity is warranted for further research.  
21  
22  
23  
24

## 25 ACKNOWLEDGEMENTS

26  
27  
28 We would like to thank all residents for their time and efforts with the  
29 collection of medical records at Okinawa Chubu Hospital. In addition, we  
30 thank Dr. Yasutani for interpretation for radiological findings.  
31  
32  
33

## 34 References

- 35  
36  
37 1 Cottin V, Nuns H, Billet PY, et al; Group d'Etude et de Recherche sur les maladies Orphelines  
38 Pulmonaries ( GERM O P ). Combined pulmonary fibrosis and emphysema: a distinct  
39 underrecognised entity. *Eur Respir J* 2005; 26: 586–593.  
40  
41  
42 2. Wiggins J, Strickland B, Turner-Warwick M. Combined cryptogenic fibrosing alveolitis and  
43 emphysema: the value of high resolution computed tomography in assessment. *Respir Med* 1990;  
44 84: 365–369.  
45  
46  
47 3. Mura M, Zompatori M, Pacilli AMG, et al. The presence of emphysema further impairs physiologic  
48 function in patients with idiopathic pulmonary fibrosis. *Respir Care* 2006; 51: 257–265.  
49  
50  
51 4. Strickland NH, Hughes JM, Hart DA, et al. Cause of regional ventilation-perfusion mismatching in  
52 patients with idiopathic pulmonary fibrosis: a combined CT and scintigraphic study. *AJR Am J*  
53 *Roentgenol*, 1993; 161: 719–725.  
54  
55  
56  
57  
58  
59  
60

- 1  
2  
3  
4  
5  
6  
7  
8  
9  
10  
11  
12  
13  
14  
15  
16  
17  
18  
19  
20  
21  
22  
23  
24  
25  
26  
27  
28  
29  
30  
31  
32  
33  
34  
35  
36  
37  
38  
39  
40  
41  
42  
43  
44  
45  
46  
47  
48  
49  
50  
51  
52  
53  
54  
55  
56  
57  
58  
59  
60
5. Doherty MJ, Pearson MG, O'Grady EA, et al. Cryptogenic fibrosing alveolitis with preserved lung volumes. *Thorax* 1997; 52: 998–1002.
6. Cottin V, Le Pavec J, Prevot G, et al (GERM O P). Pulmonary hypertension in patients with combined pulmonary fibrosis and emphysema syndrome, *Eur. Respir J* 2010; 35 (1): 105–111.
7. Lettieri CJ, Nathan SD, Barnett SD, et al. Prevalence and outcomes of pulmonary arterial hypertension in advanced idiopathic pulmonary fibrosis. *Chest* 2006; 129: 746–752.
8. Hamada K, Nagai S, Tanaka S, et al. Significance of pulmonary arterial pressure and diffusion capacity of the lung as prognosticator in patients with idiopathic pulmonary fibrosis. *Chest* 2007; 131: 650–656.
9. Oswald-Mammosser M, Weitzenblum E, Quoix E, et al. Prognostic factors in COPD patients receiving long-term oxygen therapy. Importance of pulmonary artery pressure. *Chest* 1995; 107: 1193–1198.
10. Usui K, Tanai C, Tanaka Y, et al. The prevalence of pulmonary fibrosis combined with emphysema in patients with lung cancer. *Respirology* 2011; 16: 326–331.
11. Cottin V, Cordier JF. The syndrome of combined pulmonary fibrosis and emphysema. *Chest* 2009; 136: 1–2.
12. Mejia M, Carrillo G, Rojas-Serrano J, et al. Idiopathic pulmonary fibrosis and emphysema: decreased survival associated with severe pulmonary arterial hypertension. *Chest* 2009; 136: 10–15.
13. Thabut G, Dauriat G, Stern JB, et al. Pulmonary hemodynamics in advanced COPD candidates for lung volume reduction surgery or lung transplantation. *Chest* 2005; 127: 1531–1536.
14. Chaouat A, Naeije R, Weitzenblum E. Pulmonary hypertension in COPD. *Eur Respir J* 2008; 32: 1371–1385.
15. American Thoracic Society. American Thoracic Society/European Respiratory Society International Multidisciplinary Consensus Classification of the Idiopathic Interstitial Pneumonias. *Am J Respir Crit Care Med* 2002; 165: 277–304.

- 1  
2  
3  
4  
5  
6  
7  
8  
9  
10  
11  
12  
13  
14  
15  
16  
17  
18  
19  
20  
21  
22  
23  
24  
25  
26  
27  
28  
29  
30  
31  
32  
33  
34  
35  
36  
37  
38  
39  
40  
41  
42  
43  
44  
45  
46  
47  
48  
49  
50  
51  
52  
53  
54  
55  
56  
57  
58  
59  
60
16. Raghu G, Collard H, Egan J, et al; ATS/ERS/JRS/ALAT Committee on Idiopathic Pulmonary Fibrosis. An Official ATS/ERS/JRS/ALAT Statement: Idiopathic Pulmonary Fibrosis: Evidence-based Guidelines for Diagnosis and Management . *Am J Respir Crit Care Med* 2011;183: 788–824.
17. Kitaguchi Y, Fujimoto K, Hanaoka M, et al. Clinical characteristics of combined pulmonary fibrosis and emphysema. *Respirology* 2010;156:265–271.
18. Collard HR, Moore BB, Flaherty KR, et al. Idiopathic Pulmonary Fibrosis Clinical Research Network Investigators. Acute exacerbations of idiopathic pulmonary fibrosis. *Am J Respir Crit Care Med* 2007;176:636–643.
19. Lee CH, Kim HJ, Park CM, et al. The impact of combined pulmonary fibrosis and emphysema on mortality *Int J Tuberc Lung Dis* 2011; 15(8):1111–1116.
20. Akagi T, Matsumoto T, Harada T, et al. Coexistent emphysema delays the decrease of vital capacity in idiopathic pulmonary fibrosis. *Respir Med.* 2009; 103(8):1209–1215.
21. Jankowich MD, Rounds S. Combined pulmonary fibrosis and emphysema alters physiology but has similar mortality to pulmonary fibrosis without emphysema. *Lung* 2010; 188(5): 365–373.
22. Peng M, Cai F, Tian XL, et al. Combined pulmonary fibrosis and emphysema syndrome. *Zhonghua Jie He He Hu Xi Za Zhi* 2010; 33(7): 515–518.
23. Wells A, Desai S, Rubens M, et al. Idiopathic Pulmonary Fibrosis: A Composite Physiologic Index Derived from Disease Extent Observed by Computed Tomography. *Am J Respir Crit Care Med* 2003; 167: 962–969.
24. Rogliani P, Mura M, Mattia P, et al. HRCT and histopathological evaluation of fibrosis and tissue destruction in IPF associated with pulmonary emphysema. *Respir Med* 2008;102(12):1753–1761.
25. Hozumi H, Nakamura Y, Johkoh T, et al. Nonspecific Interstitial Pneumonia: Prognostic Significance of High-Resolution Computed Tomography in 59 Patients. *J Comput Assist Tomogr* 2011; 35: 583–589.
26. Sumikawa H, Johkoh T, Colby T, et al. Computed Tomography Findings in Pathological Usual Interstitial Pneumonia □ Relationship to Survival. *Am J Respir Crit Care Med* 2008;177:433–439.

- 1  
2  
3  
4  
5  
6  
7  
8  
9  
10  
11  
12  
13  
14  
15  
16  
17  
18  
19  
20  
21  
22  
23  
24  
25  
26  
27  
28  
29  
30  
31  
32  
33  
34  
35  
36  
37  
38  
39  
40  
41  
42  
43  
44  
45  
46  
47  
48  
49  
50  
51  
52  
53  
54  
55  
56  
57  
58  
59  
60
27. Nathan SD, Shlobin OA, Barnett SD, et al. Right ventricular systolic pressure by echocardiography as a predictor of pulmonary hypertension in idiopathic pulmonary fibrosis. *Respir Med* 2008; 102: 1305–1310.
28. Ley B, Collard H, King T. Clinical Course and Prediction of Survival in Idiopathic Pulmonary Fibrosis. *Am J Respir Crit Care Med* 2011;183:431–440.
29. Song JW, Hong SB, Lim CM, et al. Acute exacerbation of idiopathic pulmonary fibrosis: incidence, risk factors and outcome. *Eur Respir J* 2011; 37: 356–363.
30. Kondoh Y, Taniguchi H, Katsuta T, et al. Risk factors of acute exacerbation of idiopathic pulmonary fibrosis. *Sarcoidosis Vasc Diffuse Lung Dis* 2010 July; 27(2):103–110.
31. Roland M. du Bois, Derek Weycker, Carlo Albera, et al. Forced Vital Capacity in Patients with Idiopathic Pulmonary Fibrosis. Test Properties and Minimal Clinically Important Difference. *Am J Respir Crit Care Med* 2011;184:1382-1389.
32. Cushley MJ, Davison AG, du Bois RM, et al. The diagnosis, assessment and treatment of diffuse parenchymal lung disease in adults. *Thorax* 1999; 54: S1–S30.
33. Portillo Carroz K, Roldan Sanchez J, Morera Prat J. Combined pulmonary fibrosis and emphysema. *Arch Bronchoneumol* 2010; 46(12):646–51.
34. du Bois R, Weycker D, Albera C, et al. Ascertainment of Individual Risk of Mortality for Patients with Idiopathic Pulmonary Fibrosis. *Am J Respir Crit Care Med* 2011;184:459–466.
35. Marten K, Milne D, Antoniou K, et al. Non-specific interstitial pneumonia in cigarette smokers: a CT study. *Eur Radiol* 2009; 19: 1679–1685.

### Figure Legends:

Figure 1; Flow diagram in CPFE patients

Figure 2; Survival curve in CPFE patients

Figure 3; CPFE patients with clubbing show poor survival compared with that of without clubbing

Figure 4; Ratio of %FEV1 and %FVC more than 1.2 show poor survival rather than that of less than 1.2 in CPFE patients

TABLE 1. Patient clinical characteristics in CPFE

|                            | Survivors<br>( n= 26 )    | Non-survivors<br>( n= 67 ) | p-value  |
|----------------------------|---------------------------|----------------------------|----------|
| Age, year (mean)           | 73.19 ± 1.18<br>(57-84)   | 73.83 ± 7.07<br>(56-91)    | 0.5815   |
| Male sex, %                | 85                        | 81                         | 0.6570   |
| Pack-year                  | 60 ±<br>22.0( 5-110 )     | 64 ± 31.4 ( 0-180 )        | 0.5754   |
| mMRC scale                 | 2.6 ± 0.88<br>( 1-4 )     | 2.5 ± 0.93 ( 1-4 )         | 0.5091   |
| Dyspnea duration<br>months | 11.04 ± 5.73<br>( 0-18 )  | 13.07 ± 14.20<br>( 0-96 )  | 0.4821   |
| Clubbing, %                | 12                        | 55                         | < 0.0001 |
| KL-6, IU/L                 | 852 ± 278<br>( 505-1200 ) | 1174 ± 725<br>( 201-4250 ) | 0.0413   |
| Systolic PAP,<br>mmHg      | 45                        | 75                         | < 0.0001 |

|                                  |                                |                                |          |
|----------------------------------|--------------------------------|--------------------------------|----------|
| Baseline FEV <sub>1</sub> ,%     | 71.14 ± 8.72<br>( 59.6-103.9 ) | 70.88 ± 9.25<br>( 31.4-106.3 ) | 0.9128   |
| Baseline FVC,%                   | 68.52 ± 9.09<br>( 57-99.7 )    | 61.89 ± 9.48<br>( 24.9-82.3 )  | 0.0058   |
| HOT , %                          | 12                             | 43                             | 0.0035   |
| Paraseptal emphysema, %          | 19                             | 69                             | < 0.0001 |
| Acute exacerbation, n(%)         | 0 (0)                          | 22 (32)                        | 0.0007   |
| %FEV <sub>1</sub> / %FVC >1.2, % | 19                             | 79                             | < 0.0001 |
| Cancer, %                        | 0                              | 18                             | 0.1068   |
| Cardiovascular, %                | 27                             | 40                             | 0.2339   |
| Ejection fraction. %             | 58.2 ± 3.90                    | 56.9 ± 5.19                    | 0.2337   |
| Survival time , months           | 50.16 ± 17.79<br>( 26 – 96 )   | 25.68 ± 21.54<br>( 1 – 98 )    | < 0.0001 |

Data are presented as mean ± SD and mean %predicted ± SD

Definitions of abbreviations: IPF = Idiopathic Pulmonary Fibrosis; NSIP = Non Specific Interstitial Pneumonia; mMRC = modified Medical Research Council; FEV<sub>1</sub>= forced expired volume in one second; FVC = forced vital capacity; **HOT = Home Oxygen Therapy**

**Table 2. Predictor of acute exacerbation in CPFE patients**

|                  | Odds Ratio | 95% CI        | p-value |
|------------------|------------|---------------|---------|
| Age              | 0.9691     | 0.8985-1.0453 | 0.417   |
| mMRC scale       | 0.6681     | 0.3538-1.2616 | 0.214   |
| Dyspnea duration | 0.8967     | 0.8169-0.9844 | 0.022   |
| Baseline KL-6    | 1.0016     | 1.0003-1.0027 | 0.009   |
| CT pattern       | 0.7612     | 0.2247-2.5779 | 0.661   |

Definitions of abbreviations: CI= confidence interval, mMRC = modified Medical Research Council

**Table 3. HRCT Imaging in CPFE patients**

|                              | UIP<br>pattern<br>( n=68 ) | NSIP<br>Pattern<br>( n= 25 ) | All<br>( n= 93 ) |
|------------------------------|----------------------------|------------------------------|------------------|
| <b>Emphysema<br/>pattern</b> |                            |                              |                  |
| Paraseptal,%                 | 57                         | 48                           | 55               |
| Centrilobular,%              | 29                         | 32                           | 30               |
| Panlobular,%                 | 14                         | 20                           | 15               |
| <b>Fibrosis pattern</b>      |                            |                              |                  |



|                                   |            |            |           |
|-----------------------------------|------------|------------|-----------|
| <b>Traction bronchiectasis, %</b> | <b>96</b>  | <b>88</b>  | <b>94</b> |
| <b>Reticulation, %</b>            | <b>91</b>  | <b>88</b>  | <b>90</b> |
| <b>Honeycombing, %</b>            | <b>100</b> | <b>0</b>   | <b>73</b> |
| <b>Ground glass opacity, %</b>    | <b>34</b>  | <b>100</b> | <b>52</b> |
| <b>Consolidation, %</b>           | <b>29</b>  | <b>60</b>  | <b>38</b> |

**Definitions of abbreviations: HRCT = High resolution computed tomography ; IPF = Idiopathic pulmonary fibrosis ; NSIP = Non specific interstitial pneumonia.**

**Table 4. Results of the Cox proportional hazards regression analysis of mortality in CPFE patients**

|                                               | <b>Hazards ratio</b> | <b>95% CI</b>        | <b>P-value</b> |
|-----------------------------------------------|----------------------|----------------------|----------------|
| <b>Finger clubbing</b>                        | <b>2.2620</b>        | <b>1.1746-4.3560</b> | <b>0.015</b>   |
| <b>%FEV<sub>1</sub>/%FVC<br/>( &gt; 1.2 )</b> | <b>1.9259</b>        | <b>1.0057-3.6883</b> | <b>0.048</b>   |

**Definitions of abbreviations: CI = confidence interval ; FVC = forced vital capacity.**

1  
2  
3  
4  
5  
6  
7  
8  
9  
10  
11  
12  
13  
14  
15  
16  
17  
18  
19  
20  
21  
22  
23  
24  
25  
26  
27  
28  
29  
30  
31  
32  
33  
34  
35  
36  
37  
38  
39  
40  
41  
42  
43  
44  
45  
46  
47  
48  
49  
50  
51  
52  
53  
54  
55  
56  
57  
58  
59  
60

For peer review only

1  
2  
3  
4  
5  
6  
7  
8  
9  
10  
11  
12  
13  
14  
15  
16  
17  
18  
19  
20  
21  
22  
23  
24  
25  
26  
27  
28  
29  
30  
31  
32  
33  
34  
35  
36  
37  
38  
39  
40  
41  
42  
43  
44  
45  
46  
47  
48  
49  
50  
51  
52  
53  
54  
55  
56  
57  
58  
59  
60

**319 interstitial lung disease( ILD ) patients were identified  
from 2002 to 2007**

**226 patients were excluded**

**→ due to ineligibility**

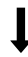

**93 patients followed up**

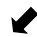

**UIP/CPFE  
( n = 68 )**

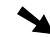

**NSIP/CPFE  
( n = 25 )**

*For peer review only*

1  
2  
3  
4  
5  
6  
7  
8  
9  
10  
11  
12  
13  
14  
15  
16  
17  
18  
19  
20  
21  
22  
23  
24  
25  
26  
27  
28  
29  
30  
31  
32  
33  
34  
35  
36  
37  
38  
39  
40  
41  
42  
43  
44  
45  
46  
47  
48  
49  
50  
51  
52  
53  
54  
55  
56  
57  
58  
59  
60

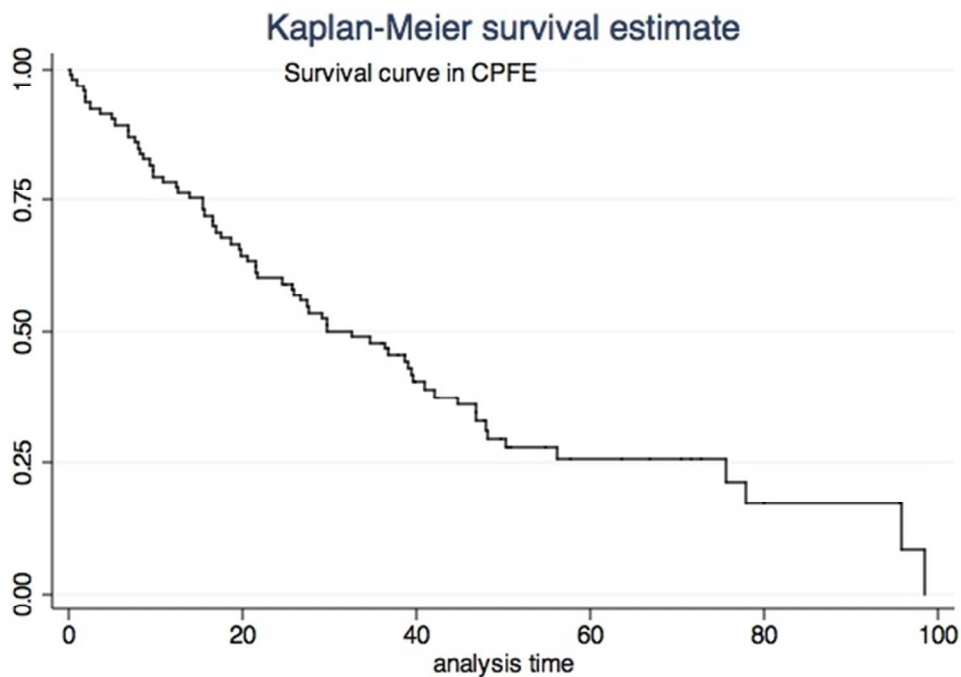

213x155mm (72 x 72 DPI)

view only

1  
2  
3  
4  
5  
6  
7  
8  
9  
10  
11  
12  
13  
14  
15  
16  
17  
18  
19  
20  
21  
22  
23  
24  
25  
26  
27  
28  
29  
30  
31  
32  
33  
34  
35  
36  
37  
38  
39  
40  
41  
42  
43  
44  
45  
46  
47  
48  
49  
50  
51  
52  
53  
54  
55  
56  
57  
58  
59  
60

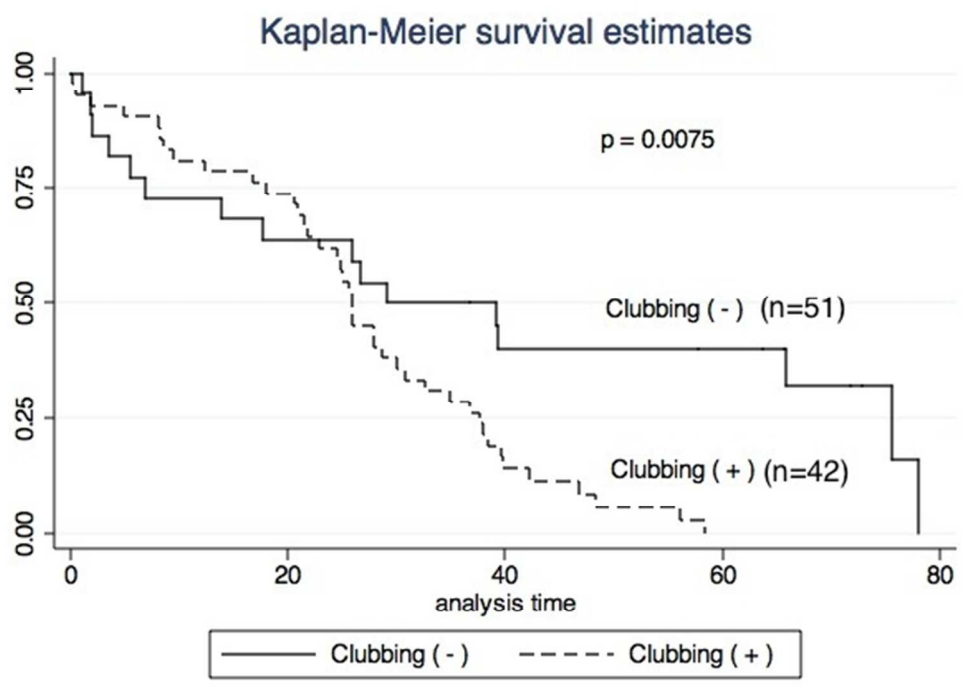

51x37mm (300 x 300 DPI)

view only

1  
2  
3  
4  
5  
6  
7  
8  
9  
10  
11  
12  
13  
14  
15  
16  
17  
18  
19  
20  
21  
22  
23  
24  
25  
26  
27  
28  
29  
30  
31  
32  
33  
34  
35  
36  
37  
38  
39  
40  
41  
42  
43  
44  
45  
46  
47  
48  
49  
50  
51  
52  
53  
54  
55  
56  
57  
58  
59  
60

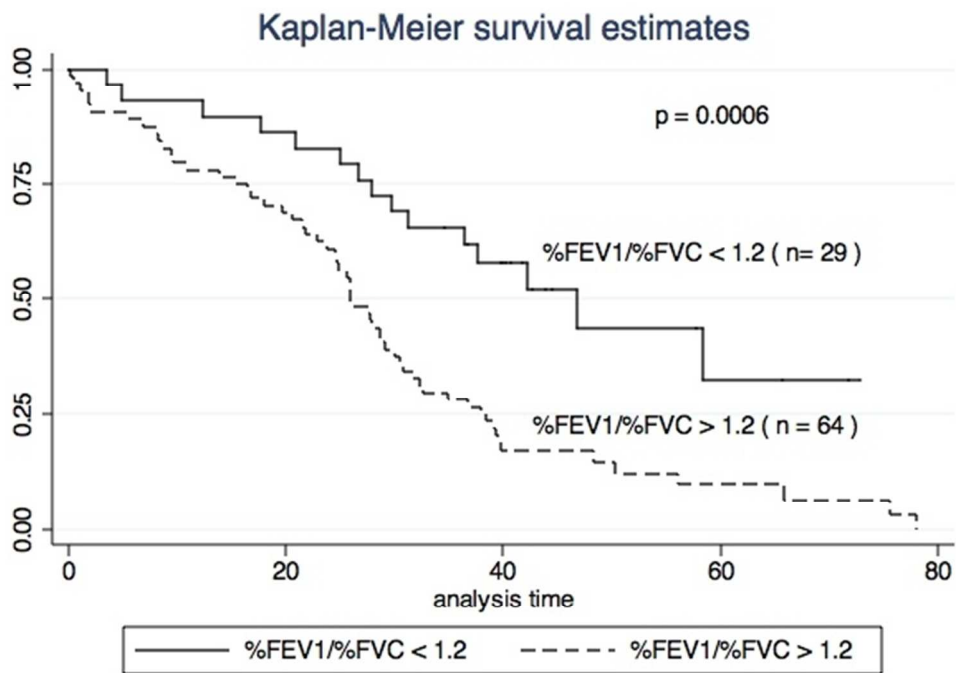

213x155mm (72 x 72 DPI)

view only
